# Supplementary material
Source: publisher figshare collection journal article supplement (https://acs.figshare.com/ndownloader/files/15303074)
Supplement: Supplementary file 1 [file 15303074]

Supporting Information for

**Catalytic Enantioselective Diels-Alder Reactions of Benzoquinones and  
Vinylindoles with Chiral Magnesium Phosphate Complexes**

Yujia Bai, Jinping Yuan, Xiaoyue Hu, and Jon C. Antilla\*

*Institute for Molecular Design and Synthesis, School of Pharmaceutical  
Science and Technology, Health Science Platform, Tianjin University, Tianjin  
300072 (China)*

\*Email: [jantilla@tju.edu.cn](mailto:jantilla@tju.edu.cn)

**Content**

|                                                                                           |    |
|-------------------------------------------------------------------------------------------|----|
| 1. General Considerations .....                                                           | 2  |
| 2. General procedure for preparation of the 3-vinylindoles substrates.....                | 2  |
| 3. General procedure for the organocatalytic, enantioselective Diels-Alder reaction ..... | 9  |
| 4. General procedure for the reduction reaction of 4d <sup>6</sup> .....                  | 20 |
| 5. A detailed synthetic method example at a minimum 1 mmol scale .....                    | 21 |
| 6. References.....                                                                        | 22 |
| 7. Copies of NMR spectra and HPLC Chromatograms .....                                     | 23 |

## 1. General Considerations

**General Methods.**  $^1\text{H}$ ,  $^{13}\text{C}$  NMR spectra were recorded on Bruker AVANCE IIITM HD NanoBAY (400 MHz) and Bruker AVANCE III (600 MHz) instruments with chemical shifts reported relative to tetramethylsilane (TMS). Chemical shifts ( $\delta$ ) are reported in ppm relative to residual solvent signals for  $^1\text{H}$  and  $^{13}\text{C}$  NMR ( $^1\text{H}$  NMR: 7.26 ppm for  $\text{CDCl}_3$ , 7.16 ppm for  $\text{C}_6\text{D}_6$ , 2.50 ppm for  $\text{DMSO-d}_6$ , 2.05 ppm for acetone- $\text{d}_6$ ;  $^{13}\text{C}$  NMR: 77.0 ppm for  $\text{CDCl}_3$ , 128.0 ppm for  $\text{C}_6\text{D}_6$ , 39.5 ppm for  $\text{DMSO-d}_6$ , 29.8 ppm for acetone- $\text{d}_6$ ). The HRMS data were measured on a Thermo Fisher Q Exactive HF LC-MS. Optical rotations were measured on a Rudolph Research Analytical Autopol IV polarimeter ( $\lambda$  589) using a 700- $\mu\text{L}$  cell with a path length of 1 dm. The enantiomeric excess (ee) of the products was determined by chiral stationary phase HPLC (Chiralpak AD-H or Chiralpak OD-H or Chiralpak IA-H columns), using a UV detector operating at 254 nm. Melting points were measured on a Büchi smp-20 apparatus.

**Materials.** All reactions were carried out in flame-dried or oven-dried screw-cap test tubes and were allowed to proceed under a dry argon atmosphere with magnetic stirring. Analytical grade solvents and commercially available reagents were used as received, unless otherwise stated. Solvents were purified by passing through the column of activated alumina before use. Chromatographic purifications were performed using 200-300 mesh silica. Molecular Sieves (4Å) were flame-dried under high vacuum before use. Catalysts were prepared in some steps from (*R*)-BINOL, respectively, following literature procedures.<sup>1</sup> 3-Vinylindoles **2a-2r** were prepared by a Wittig reaction from the corresponding aldehydes, following a literature procedure as outlined below, and were stored at  $-20\text{ }^\circ\text{C}$ . Racemic samples were prepared using Magnesium TRIP-Phosphoric Acid as a catalyst at room temperature.

## 2. General procedure for preparation of the 3-vinylindoles substrates

Synthesis of 3-vinylindoles substrates:

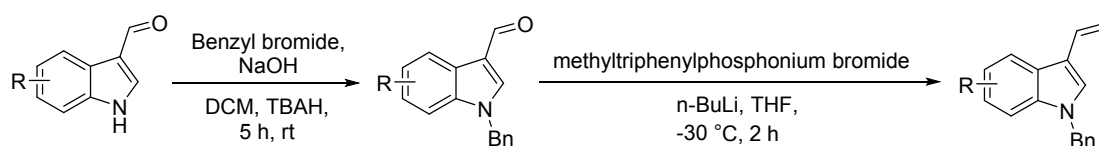

### A) General procedure for protection of 3-vinylindoles:<sup>2</sup>

To a flame – dried flask equipped with a stir bar was added the corresponding enone (1 equiv) and DCM. Sodium hydroxide (2.5 equiv) and tetrabutylammonium hydrogensulfate (TBAH) (0.2 equiv) were then added as single portions. The reaction mixture was stirred at room temperature under nitrogen atmosphere for 0.5 hour. Benzyl bromide (1.2 equiv) was then added dropwise and the reaction was allowed to stir for 5 hours. After completion, the reaction was quenched with saturated  $\text{NH}_4\text{Cl}$  solution and extracted with DCM. The combined organic layers were washed with brine solution and then dried

over Na<sub>2</sub>SO<sub>4</sub>. After solvent was removed by rotary evaporation, the crude product was purified via flash column chromatography with a gradient of an appropriate eluent on silica gel (petroleum ether – ethyl acetate, 4:1).

B) The preparation of 3-vinylindoles through a Wittig reaction:<sup>3</sup>

To a solution of methyltriphenylphosphonium bromide (1.5 equiv) in anhydrous THF under argon at -30 °C, n-BuLi (2.5 M in n-hexane; 1.5 equiv) was slowly added. The mixture was stirred at the indicated temperature for 1h. Then the solution of an indole-3-carboxaldehyde (1 equiv) in anhydrous THF was added dropwise to the ylide formed, the reaction was stirred at -30 °C for 1h. The resulting suspension was poured into Ether-H<sub>2</sub>O (300:1, 30mL). The precipitate was filtered through a funnel and the filtrate was dried over Na<sub>2</sub>SO<sub>4</sub>. The solvent was evaporated under vacuum, the crude product was purified by flash chromatography on neutral aluminium oxide (petroleum ether – ethyl acetate, 30:1) and recrystallization give product **2a-2r**.

### 1-benzyl-3-vinyl-1H-indole (2a)

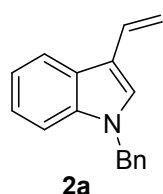

White solid, 249mg, yield: 85%; M.P.: 76 – 78 °C. <sup>1</sup>H NMR (600 MHz, CDCl<sub>3</sub>) δ 7.90 (dd, *J* = 6.9, 1.2 Hz, 1H), 7.30 – 7.28 (m, 4H), 7.23 – 7.15 (m, 3H), 7.13 (d, *J* = 7.2 Hz, 2H), 6.88 (dd, *J* = 17.8, 11.3 Hz, 1H), 5.69 (dd, *J* = 17.8, 1.3 Hz, 1H), 5.30 (s, 2H), 5.15 (dd, *J* = 11.3, 1.3 Hz, 1H). <sup>13</sup>C NMR (151 MHz, CDCl<sub>3</sub>) δ 137.20, 137.14, 129.34, 128.85, 127.77, 127.64, 126.88, 126.44, 122.32, 120.34, 120.21, 114.84, 110.39, 110.00, 50.06. HRMS (ESI) calcd for C<sub>17</sub>H<sub>15</sub>N [M+H]<sup>+</sup>: 234.1277, found: 234.1279.

### 1-benzyl-4-bromo-3-vinyl-1H-indole (2b)

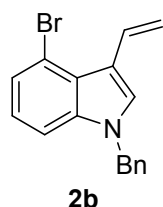

Yellow solid, 339mg, yield: 87%; M.P.: 52 – 54 °C. <sup>1</sup>H NMR (600 MHz, CDCl<sub>3</sub>) δ 7.58 (dd, *J* = 17.5, 10.9 Hz, 1H), 7.27 – 7.15 (m, 5H), 7.09 (d, *J* = 8.2 Hz, 1H), 7.00 (d, *J* = 7.1 Hz, 2H), 6.87 (t, *J* = 7.9 Hz, 1H), 5.36 (dd, *J* = 17.5, 1.7 Hz, 1H), 5.18 (s, 2H), 5.02 (dd, *J* = 10.9, 1.7 Hz, 1H). <sup>13</sup>C NMR (151 MHz, CDCl<sub>3</sub>) δ 136.70, 135.54, 128.42, 127.84, 126.84, 125.68, 125.22, 124.10, 123.42, 121.61, 115.39, 113.56, 109.84, 108.24, 49.26. HRMS (ESI) calcd for C<sub>17</sub>H<sub>14</sub>BrN [M+H]<sup>+</sup>: 312.0382, found: 312.0384.

### 1-benzyl-4-chloro-3-vinyl-1H-indole (2c)

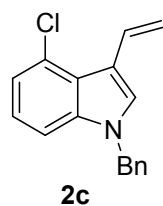

Yellow solid, 265mg, yield: 79%; M.P.: 48 – 50 °C. <sup>1</sup>H NMR (600 MHz, CDCl<sub>3</sub>) δ 7.55 (dd, *J* = 17.5, 10.9 Hz, 1H), 7.34 – 7.23 (m, 4H), 7.12 (d, *J* = 8.2 Hz, 1H), 7.09 (d, *J* = 7.5 Hz, 3H), 7.02 (t, *J* = 7.8 Hz, 1H), 5.45 (d, *J* = 17.5 Hz, 1H), 5.26 (s, 2H), 5.08 (d, *J* = 10.9 Hz, 1H). <sup>13</sup>C NMR (151 MHz, CDCl<sub>3</sub>) δ 137.95, 136.66, 129.59, 128.92, 127.92, 126.80, 126.77, 125.86, 122.39, 121.07, 115.94, 110.95, 108.75, 50.33. HRMS (ESI) calcd for C<sub>17</sub>H<sub>14</sub>ClN [M+H]<sup>+</sup>: 268.0888, found: 268.0890.

**1-benzyl-5-bromo-3-vinyl-1H-indole (2d)**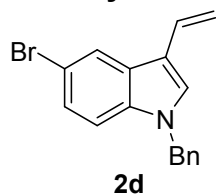

White solid, 328mg, yield: 84%; M.P.: 50 – 52 °C. <sup>1</sup>H NMR (400 MHz, CDCl<sub>3</sub>) δ 8.00 (d, *J* = 1.7 Hz, 1H), 7.32 – 7.24 (m, 4H), 7.17 (s, 1H), 7.14 – 7.03 (m, 3H), 6.80 (dd, *J* = 17.8, 11.4 Hz, 1H), 5.64 (dd, *J* = 17.8, 1.2 Hz, 1H), 5.24 (s, 2H), 5.17 (dd, *J* = 11.4, 1.2 Hz, 1H). <sup>13</sup>C NMR (101 MHz, CDCl<sub>3</sub>) δ 136.63, 135.77, 128.93, 128.60, 128.45, 127.95, 126.78, 125.12, 122.89, 114.46, 113.62, 111.45, 111.13, 50.28. HRMS (ESI) calcd for C<sub>17</sub>H<sub>14</sub>BrN [M+H]<sup>+</sup>: 312.0382, found: 312.0386.

**1-benzyl-5-chloro-3-vinyl-1H-indole (2e)**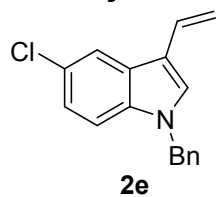

White solid, 278mg, yield: 83%; M.P.: 42 – 44 °C. <sup>1</sup>H NMR (600 MHz, CDCl<sub>3</sub>) δ 7.84 (s, 1H), 7.33 – 7.27 (m, 3H), 7.16 (s, 1H), 7.14 – 7.10 (m, 2H), 7.06 (d, *J* = 6.9 Hz, 2H), 6.79 (dd, *J* = 17.8, 11.3 Hz, 1H), 5.63 (d, *J* = 17.8 Hz, 1H), 5.21 (s, 2H), 5.16 (d, *J* = 11.3 Hz, 1H). <sup>13</sup>C NMR (151 MHz, CDCl<sub>3</sub>) δ 136.68, 135.53, 128.94, 128.68, 128.68, 127.95, 127.42, 126.80, 126.04, 122.58, 119.84, 114.53, 111.03, 111.02, 50.30. HRMS (ESI) calcd for C<sub>17</sub>H<sub>14</sub>ClN [M+H]<sup>+</sup>: 268.0888, found: 268.0891.

**1-benzyl-6-bromo-3-vinyl-1H-indole (2f)**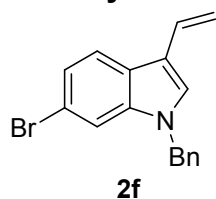

White solid, 328mg, yield: 84%; M.P.: 94 – 95 °C. <sup>1</sup>H NMR (600 MHz, CDCl<sub>3</sub>) δ 7.73 (d, *J* = 8.4 Hz, 1H), 7.42 (s, 1H), 7.34 – 7.25 (m, 4H), 7.17 – 7.04 (m, 3H), 6.82 (dd, *J* = 17.8, 11.3 Hz, 1H), 5.65 (d, *J* = 17.8 Hz, 1H), 5.22 (s, 2H), 5.17 (d, *J* = 11.3 Hz, 1H). <sup>13</sup>C NMR (151 MHz, CDCl<sub>3</sub>) δ 137.96, 136.53, 128.97, 128.74, 127.97, 126.80, 125.28, 123.42, 121.51, 115.96, 115.06, 112.91, 111.14, 50.09. HRMS (ESI) calcd for C<sub>17</sub>H<sub>14</sub>BrN [M+H]<sup>+</sup>: 312.1382, found: 312.0390.

**1-benzyl-6-fluoro-3-vinyl-1H-indole (2g)**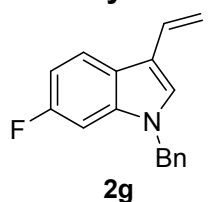

White solid, 274mg, yield: 87%; M.P.: 93 – 95 °C. <sup>1</sup>H NMR (600 MHz, CDCl<sub>3</sub>) δ 7.79 (dd, *J* = 9.4, 5.3 Hz, 1H), 7.35 – 7.27 (m, 3H), 7.17 (s, 1H), 7.12 (d, *J* = 7.1 Hz, 2H), 6.93 (ddd, *J* = 9.4, 6.2, 2.4 Hz, 2H), 6.83 (dd, *J* = 17.8, 11.3 Hz, 1H), 5.66 (dd, *J* = 17.8, 1.0 Hz, 1H), 5.22 (s, 2H), 5.16 (dd, *J* = 11.3, 1.0 Hz, 1H). <sup>13</sup>C NMR (151 MHz, CDCl<sub>3</sub>) δ 160.76, 159.18, 137.27, 136.60, 128.97, 128.92, 127.98, 127.88, 127.86, 126.83, 122.95, 121.14, 121.07, 115.01, 110.79, 108.88, 108.71, 96.56, 96.39, 50.26. HRMS (ESI) calcd for C<sub>17</sub>H<sub>14</sub>FN [M+H]<sup>+</sup>: 252.1183, found: 252.1184.



### 1-benzyl-5-methyl-3-vinyl-1H-indole (2h)

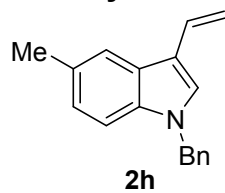

2h

White solid, 270mg, yield: 87%; M.P.: 47 – 49 °C. <sup>1</sup>H NMR (600 MHz, CDCl<sub>3</sub>) δ 7.72 (s, 1H), 7.33 – 7.26 (m, 3H), 7.17 (t, *J* = 4.1 Hz, 2H), 7.13 (d, *J* = 7.0 Hz, 2H), 7.05 (dd, *J* = 8.3, 1.1 Hz, 1H), 6.89 (dd, *J* = 17.8, 11.3 Hz, 1H), 5.71 (dd, *J* = 17.8, 1.4 Hz, 1H), 5.27 (s, 2H), 5.17 (dd, *J* = 11.3, 1.4 Hz, 1H), 2.50 (s, 3H). <sup>13</sup>C NMR (151 MHz, CDCl<sub>3</sub>) δ 136.19, 134.50, 128.41, 128.38, 127.72, 126.69, 126.59, 125.71, 125.56, 122.75, 118.99, 113.22, 108.93, 108.58, 48.99, 20.56, 20.53. HRMS (ESI) calcd for C<sub>18</sub>H<sub>17</sub>N [M+H]<sup>+</sup>: 248.1434, found: 248.1436.

### 1-benzyl-5-methoxy-3-vinyl-1H-indole (2i)

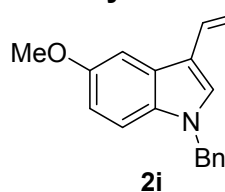

2i

White solid, 254mg, yield: 77%; M.P.: 57 – 59 °C. <sup>1</sup>H NMR (600 MHz, CDCl<sub>3</sub>) δ 7.33 – 7.25 (m, 4H), 7.20 – 7.04 (m, 4H), 6.91 – 6.81 (m, 2H), 5.62 (dd, *J* = 17.8, 1.1 Hz, 1H), 5.25 (s, 2H), 5.13 (dd, *J* = 11.3, 1.1 Hz, 1H), 3.87 (s, 3H). <sup>13</sup>C NMR (151 MHz, CDCl<sub>3</sub>) δ 154.61, 137.17, 132.42, 129.35, 128.83, 128.11, 127.73, 126.80, 114.34, 112.23, 110.72, 109.80, 102.34, 100.00, 55.94, 50.28. HRMS (ESI) calcd for C<sub>18</sub>H<sub>17</sub>NO [M+H]<sup>+</sup>: 264.1383, found: 264.1386.

### 1-benzyl-6-methoxy-3-vinyl-1H-indole (2j)

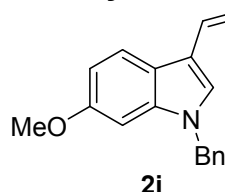

2j

White solid, 267mg, yield: 81%; M.P.: 59 – 61 °C. <sup>1</sup>H NMR (600 MHz, CDCl<sub>3</sub>) δ 7.77 (d, *J* = 8.7 Hz, 1H), 7.28 – 7.23 (m, 3H), 7.11 (d, *J* = 7.0 Hz, 2H), 7.06 (s, 1H), 6.83 (ddd, *J* = 15.4, 10.2, 8.2 Hz, 2H), 6.71 (d, *J* = 2.2 Hz, 1H), 5.66 (dd, *J* = 17.8, 1.3 Hz, 1H), 5.21 (s, 2H), 5.12 (dd, *J* = 11.3, 1.3 Hz, 1H), 3.79 (s, 3H). <sup>13</sup>C NMR (151 MHz, CDCl<sub>3</sub>) δ 156.55, 138.11, 137.07, 129.45, 128.85, 127.74, 126.86, 121.03, 120.75, 114.88, 110.15, 109.63, 108.24, 93.75, 55.67, 50.01. HRMS (ESI) calcd for C<sub>18</sub>H<sub>17</sub>NO [M+H]<sup>+</sup>: 264.1383, found: 264.1385.

### 1-benzyl-7-methyl-3-vinyl-1H-indole (2k)

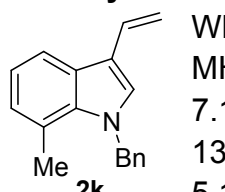

2k

White solid, 267mg, yield: 86%; M.P.: 64 – 66 °C. <sup>1</sup>H NMR (600 MHz, CDCl<sub>3</sub>) δ 7.74 (dd, *J* = 7.6, 4.8 Hz, 1H), 7.30 – 7.19 (m, 3H), 7.11 (s, 1H), 7.05 (td, *J* = 7.6, 4.4 Hz, 1H), 6.87 (ddd, *J* = 15.3, 13.4, 5.7 Hz, 4H), 5.66 (dd, *J* = 17.8, 3.6 Hz, 1H), 5.50 (s, 2H), 5.14 (dd, *J* = 11.3, 3.6 Hz, 1H), 2.49 (s, 3H). <sup>13</sup>C NMR (151 MHz, CDCl<sub>3</sub>) δ 139.29, 135.85, 129.25, 129.09, 128.92, 127.62, 127.45, 125.51, 125.25, 121.34, 120.44, 118.14, 114.73, 110.46, 52.29, 19.62. HRMS (ESI) calcd for C<sub>18</sub>H<sub>17</sub>N [M+H]<sup>+</sup>: 248.1434, found: 248.1436.

#### 1-benzyl-3-(prop-1-en-2-yl)-1H-indole (2l)<sup>4</sup>

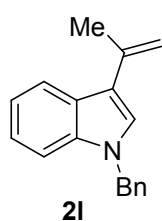

To a flame – dried flask equipped with a stir bar was added the 1-(1H-indol-3-yl)ethan-1-one (1 equiv) and DCM. Sodium hydroxide (2.5 equiv) and tetrabutylammonium hydrogensulfate (TBAH) (0.2 equiv) were then added as single portions. The reaction mixture was stirred at room temperature under nitrogen atmosphere for 0.5 hour. Benzyl bromide (1.2 equiv) was then added dropwise and the reaction was allowed to stir for 5 hours. After completion, the reaction was quenched with saturated  $\text{NH}_4\text{Cl}$  solution and extracted with DCM. The combined organic layers were washed with brine solution and then dried over  $\text{Na}_2\text{SO}_4$ . After solvent was removed by rotary evaporation, the crude product was purified via flash column chromatography with a gradient of an appropriate eluent on silica gel (petroleum ether – ethyl acetate, 4:1).

To a stirred suspension of methyltriphenylphosphonium bromide (1.5 equiv) in THF, cooled to 0 °C, *n*-BuLi (1.5 equiv, 2.5 M in hexanes) was slowly added. The resulting yellow suspension was stirred for 2 h at the same temperature, then 1-(1-benzyl-1H-indol-3-yl) ethan-1-one (1.0 equiv) was added in one portion. The mixture was stirred overnight at room temperature, and then it poured into Ether- $\text{H}_2\text{O}$  (300:1, 30 mL). The precipitate was filtered through a funnel and the filtrate was dried over  $\text{Na}_2\text{SO}_4$ . The solvent was evaporated under vacuum; the crude product was purified by flash chromatography on neutral aluminium oxide (petroleum ether-ethyl acetate, 30:1) to give the title compound in 67% yield as a white solid. 208mg. M.P.: 88 – 90 °C.  $^1\text{H}$  NMR (600 MHz,  $\text{CDCl}_3$ )  $\delta$  8.06 (d,  $J$  = 8.1 Hz, 1H), 7.40 – 7.26 (m, 7H), 7.21 (d,  $J$  = 7.4 Hz, 2H), 5.62 (s, 1H), 5.38 (s, 2H), 5.17 (s, 1H), 2.28 (s, 3H).  $^{13}\text{C}$  NMR (151 MHz,  $\text{CDCl}_3$ )  $\delta$  136.64, 136.18, 127.71, 127.58, 126.58, 125.76, 125.64, 125.06, 120.99, 120.08, 119.07, 116.45, 108.86, 108.54, 48.91, 22.26. HRMS (ESI) calcd for  $\text{C}_{18}\text{H}_{17}\text{N}$   $[\text{M}+\text{H}]^+$ : 248.1434, found: 248.1437.

#### (E/Z)-1-benzyl-3-(prop-1-en-1-yl)-1H-indole (2m)<sup>5</sup>

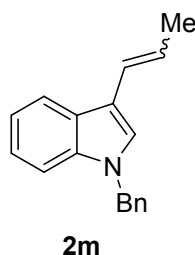

To a suspension of ethyltriphenylphosphonium bromide (1.5 equiv) in THF (20 mL) was added phenyllithium in 2.5 M *n*-BuLi solution (1.5 equiv) at room temperature and the mixture was stirred for 10 min. The solution was cooled to -78 °C and an indole-3-carboxaldehyde (1 equiv) in THF (10 mL) was added dropwise. After stirring for 5 min at -78 °C and then the mixture was stirred for overnight at room temperature. After cooling to 0 °C, the reaction mixture was quenched by saturated aqueous  $\text{NH}_4\text{Cl}$  solution and extracted with  $\text{Et}_2\text{O}$  ( $\times 3$ ). The combined organic layers were washed with brine, dried over  $\text{Na}_2\text{SO}_4$ , and evaporated in vacuo. The residue was purified by flash chromatography on neutral aluminium oxide (elution with hexane) to give **2m** as a 4:1 *E/Z* mixture in 57% yield. 212mg. M.P.: 66 – 68 °C.  $^1\text{H}$  NMR (600 MHz,  $\text{CDCl}_3$ )  $\delta$  7.85 (d,  $J$  = 7.7 Hz, 0.2H), 7.69 (d,  $J$  = 7.8 Hz, 0.8H), 7.27

(dt,  $J = 18.5, 5.3$  Hz, 4H), 7.22 – 7.09 (m, 5H), 6.67 (dd,  $J = 11.3, 0.9$  Hz, 0.8H), 6.56 (dd,  $J = 15.9, 1.5$  Hz, 0.2H), 6.19 (dq,  $J = 15.9, 6.6$  Hz, 0.2H), 5.75 (dq,  $J = 11.3, 7.0$  Hz, 0.8H), 5.34 (s, 1.6H), 5.27 (s, 0.4H), 1.91 (dt,  $J = 8.2, 2.5$  Hz, 3H).  $^{13}\text{C}$  NMR (151 MHz,  $\text{CDCl}_3$ )  $\delta$  137.42, 135.94, 128.80, 128.78, 128.22, 127.64, 126.82, 126.71, 126.02, 123.15, 122.45, 122.17, 122.07, 120.47, 120.17, 119.76, 119.58, 119.22, 113.08, 109.80, 109.61, 50.15, 49.97, 18.99, 15.69. HRMS (ESI) calcd for  $\text{C}_{18}\text{H}_{17}\text{N}$   $[\text{M}+\text{H}]^+$ : 248.1434, found: 248.1440.

### 3-vinyl-1H-indole (2n)

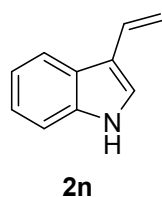

White solid, 319mg, yield: 89%; M.P.: 80 – 81 °C.  $^1\text{H}$  NMR (400 MHz,  $\text{CDCl}_3$ )  $\delta$  8.23 – 7.69 (m, 2H), 7.32 (d,  $J = 7.7$  Hz, 1H), 7.26 – 7.12 (m, 3H), 6.89 (dd,  $J = 17.8, 11.3$  Hz, 1H), 5.70 (d,  $J = 17.8$  Hz, 1H), 5.17 (d,  $J = 11.3$  Hz, 1H).  $^{13}\text{C}$  NMR (101 MHz,  $\text{CDCl}_3$ )  $\delta$  136.78, 129.45, 125.67, 123.47, 122.53, 120.38, 120.13, 115.88, 111.33, 110.79. HRMS (ESI) calcd for  $\text{C}_{10}\text{H}_9\text{N}$   $[\text{M}+\text{H}]^+$ : 143.1890, found: 143.1883.

### 1-(4-methoxyphenyl)-3-vinyl-1H-indole (2o)<sup>3</sup>

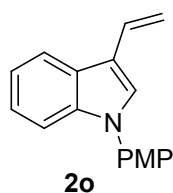

1H-indole-3-carbaldehyde (1.5 equiv), CuOAc (1.1 equiv) and the 4-iodoanisole (1.0 equiv) were placed in a reaction vessel under a stream of argon. The reaction vessel was evacuated and backfilled with argon. Anhydrous DMA (10 mL) was then added by syringe at room temperature under a stream of argon and the mixture was stirred under argon at 160 °C for 48 h. After this period, the reaction was then allowed to cool to room temperature and had been treated with a saturated aqueous  $\text{NH}_4\text{Cl}$  solution and extracted with EtOAc. The organic extract was washed with brine, dried, filtered and concentrated under reduced pressure, and the residue was purified by flash chromatography on silica gel with a mixture of hexane and ethyl acetate (5:1) as eluent to give the product for the next step.

And then to a solution of methyltriphenylphosphonium bromide (1.5 equiv) in anhydrous THF under argon at -30 °C,  $n\text{-BuLi}$  (2.5 M in  $n\text{-hexane}$ ; 1.5 equiv) was slowly added. The mixture was stirred at the indicated temperature for 1h. Then the solution of the product of the last step (1 equiv) in anhydrous THF was added dropwise to the ylide formed, the reaction was stirred at -30 °C for 1h. The resulting suspension was poured into Ether- $\text{H}_2\text{O}$  (300:1, 30 mL). The precipitate was filtered through a funnel and the filtrate was dried over  $\text{Na}_2\text{SO}_4$ . The solvent was evaporated under vacuum; the crude product was purified by flash chromatography on neutral aluminium oxide (petroleum ether-ethyl acetate, 30:1) and recrystallization give **2o** as a white solid in 62% yield. 233mg. M.P.: 56 – 58 °C.  $^1\text{H}$  NMR (600 MHz,  $\text{CDCl}_3$ )  $\delta$  7.85 (dd,  $J = 7.2, 1.7$  Hz, 1H), 7.37 – 7.33 (m, 1H), 7.32 – 7.26 (m, 3H), 7.15 (dq,  $J = 5.6, 1.9$  Hz, 2H), 6.97 – 6.92 (m, 2H), 6.86 (dd,  $J = 17.8, 11.3$  Hz, 1H), 5.68 (dd,  $J = 17.8, 1.2$  Hz, 1H), 5.14 (dd,  $J = 11.3, 1.2$  Hz, 1H), 3.79 (s, 3H).  $^{13}\text{C}$  NMR (151 MHz,

CDCl<sub>3</sub>)  $\delta$  158.42, 137.25, 132.32, 129.08, 127.45, 126.68, 126.07, 122.71, 120.68, 120.26, 115.83, 114.78, 111.08, 110.68, 55.63. HRMS (ESI) calcd for C<sub>17</sub>H<sub>15</sub>NO [M+H]<sup>+</sup>: 250.1226, found: 250.1224.

#### 1-(4-methoxybenzyl)-3-vinyl-1H-indole (2p)

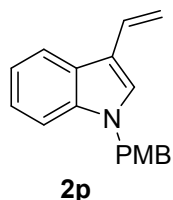

Following the general procedure, the title compound was obtained from 1H-indole-3-carbaldehyde and 4-methoxybenzyl bromide as a white solid in 85% yield. 281mg. M.P.: 66 – 68 °C. <sup>1</sup>H NMR (600 MHz, CDCl<sub>3</sub>)  $\delta$  7.88 (d, *J* = 7.0 Hz, 1H), 7.27 (d, *J* = 7.9 Hz, 1H), 7.21 – 7.12 (m, 3H), 7.05 (d, *J* = 8.4 Hz, 2H), 6.90 – 6.77 (m, 3H), 5.67 (d, *J* = 17.8 Hz, 1H), 5.17 (s, 2H), 5.13 (d, *J* = 11.2 Hz, 1H), 3.74 (s, 3H). <sup>13</sup>C NMR (151 MHz, CDCl<sub>3</sub>)  $\delta$  159.19, 137.15, 129.38, 129.07, 128.36, 127.49, 126.48, 122.23, 120.31, 120.15, 114.70, 114.20, 110.25, 110.01, 109.94, 55.33, 55.31, 49.56. HRMS (ESI) calcd for C<sub>18</sub>H<sub>17</sub>NO [M+H]<sup>+</sup>: 264.1383, found: 264.1385.

#### 1-(4-(tert-butyl)benzyl)-3-vinyl-1H-indole (2q)

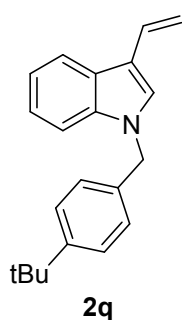

Following the general procedure, the title compound was obtained between 1H-indole-3-carbaldehyde and 4-tert-butylbenzyl bromide as a white solid in 85% yield. 308mg. M.P.: 51 – 53 °C. <sup>1</sup>H NMR (600 MHz, CDCl<sub>3</sub>)  $\delta$  7.88 (dd, *J* = 7.1, 1.0 Hz, 1H), 7.32 – 7.27 (m, 3H), 7.21 – 7.14 (m, 3H), 7.05 (d, *J* = 8.4 Hz, 2H), 6.87 (dd, *J* = 17.8, 11.3 Hz, 1H), 5.68 (dd, *J* = 17.8, 1.4 Hz, 1H), 5.22 (s, 2H), 5.13 (dd, *J* = 11.3, 1.4 Hz, 1H), 1.27 (s, 9H). <sup>13</sup>C NMR (151 MHz, CDCl<sub>3</sub>)  $\delta$  150.76, 137.27, 134.14, 129.38, 127.56, 126.68, 126.46, 125.74, 122.23, 120.29, 120.13, 114.81, 110.26, 109.99, 49.71, 34.55, 31.35. HRMS (ESI) calcd for C<sub>21</sub>H<sub>23</sub>N [M+H]<sup>+</sup>: 290.1903, found: 290.1904.

#### 1-(4-chlorobenzyl)-3-vinyl-1H-indole (2r)

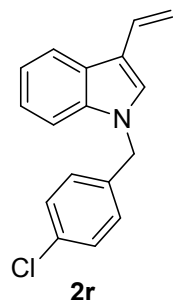

Following the general procedure, the title compound was obtained from 1H-indole-3-carbaldehyde and 4-chlorobenzyl chloride as a white solid in 76% yield. 255mg. M.P.: 59 – 61 °C. <sup>1</sup>H NMR (600 MHz, CDCl<sub>3</sub>)  $\delta$  7.90 (dd, *J* = 6.5, 1.7 Hz, 1H), 7.27 (d, *J* = 1.7 Hz, 2H), 7.23 – 7.17 (m, 4H), 7.04 (d, *J* = 8.4 Hz, 2H), 6.88 (dd, *J* = 17.8, 11.3 Hz, 1H), 5.70 (dd, *J* = 17.8, 1.3 Hz, 1H), 5.26 (s, 2H), 5.17 (dd, *J* = 11.3, 1.3 Hz, 1H). <sup>13</sup>C NMR (151 MHz, CDCl<sub>3</sub>)  $\delta$  137.03, 135.62, 133.59, 129.12, 129.01, 128.14, 127.30, 126.50, 122.43, 120.39, 120.32, 115.13, 110.66, 109.82, 49.45. HRMS (ESI) calcd for C<sub>17</sub>H<sub>14</sub>ClN [M+H]<sup>+</sup>: 268.0888, found: 268.0891.

### 3. General procedure for the organocatalytic, enantioselective Diels-Alder reaction

4 Å MS (30 mg) were added to a reaction tube and flame dried in situ. Then substrate **1a-1i** (1 equiv, 0.05 mmol), catalyst Mg[**P4**]<sub>2</sub> (3.6 mg, 5 mol%) and **2a-2r** (1.5 equiv, 0.075 mmol) were added, and then the tube was removed under argon. The resulting mixture was stirred at -25 °C for 10 min. Then anhydrous methylcyclohexane (1 mL) was added via a syringe. The mixture was then stirred overnight at the same temperature to give the crude product. The crude product was purified by washing with hexane and MeOH to give the pure D-A corresponding product **3a-3i** and **4b-4r**. Then the product **3a-3i** and **4b-4r** was analyzed by HPLC.

#### (5a*S*,12a*S*,12b*S*)-12-benzyl-6,12,12a,12b-tetrahydro-5*H*-naphtho[2,3-*a*]carbazole-5,13(5a*H*)-dione (**3a**)

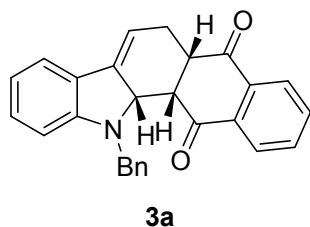

Yellow solid, 18mg, yield: 91%; M.P.: 141 – 143 °C.  $[\alpha]_D^{20} = +281.7^\circ$  (c 0.43, CHCl<sub>3</sub>). <sup>1</sup>H NMR (600 MHz, CDCl<sub>3</sub>)  $\delta$  7.31 – 7.25 (m, 8H), 7.13 (t, *J* = 7.4 Hz, 1H), 6.72 (t, *J* = 7.4 Hz, 1H), 6.63 (d, *J* = 8.0 Hz, 1H), 6.58 – 6.46 (m, 2H), 5.75 (dd, *J* = 8.0, 3.9 Hz, 1H), 4.42 (dd, *J* = 50.2, 15.7 Hz, 2H), 4.12 – 4.06 (m, 1H), 3.34 (t, *J* = 5.2 Hz, 1H), 3.17 (dd, *J* = 13.8, 8.3 Hz, 1H), 2.55 – 2.39 (m, 2H). <sup>13</sup>C NMR (151 MHz, CDCl<sub>3</sub>)  $\delta$  200.25, 196.57, 154.00, 140.59, 138.75, 137.99, 137.65, 129.88, 128.64, 127.73, 127.44, 125.90, 120.50, 118.38, 109.88, 109.07, 64.68, 52.37, 47.51, 46.30, 26.94. HRMS (ESI) calcd for C<sub>27</sub>H<sub>21</sub>NO<sub>2</sub> [M+H]<sup>+</sup>: 392.1645, found: 392.1647. The enantiomeric excess was determined to be 96% by HPLC analysis on Chiralpak AD column (20% isopropanol/hexane, 1 mL/min), UV 254 nm, *t*<sub>1</sub> (minor) = 12.4 min, *t*<sub>2</sub> (major) = 14.9 min.

#### (4a*S*,11a*S*,11b*S*)-11-benzyl-5,11,11a,11b-tetrahydro-1*H*-benzo[*a*]carbazole-1,4(4a*H*)-dione (**3b**)

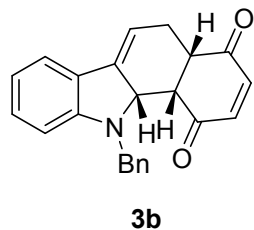

Red solid, 17mg, yield: 98%; M.P.: 128-130 °C.  $[\alpha]_D^{20} = +280^\circ$  (c 0.25, CHCl<sub>3</sub>). <sup>1</sup>H NMR (600 MHz, CDCl<sub>3</sub>)  $\delta$  7.37 – 7.26 (m, 6H), 7.12 (t, *J* = 7.5 Hz, 1H), 6.72 (t, *J* = 7.5 Hz, 1H), 6.63 (d, *J* = 7.9 Hz, 1H), 6.50 (d, *J* = 50.2 Hz, 2H), 5.74 (d, *J* = 2.8 Hz, 1H), 4.42 (dd, *J* = 50.2, 15.7 Hz, 2H), 4.13 – 4.02 (m, 1H), 3.34 (t, *J* = 4.6 Hz, 1H), 3.16 (dd, *J* = 13.3, 7.6 Hz, 1H), 2.55 – 2.40 (m, 2H). <sup>13</sup>C NMR (151 MHz, CDCl<sub>3</sub>)  $\delta$  200.22, 196.54, 154.01, 140.59, 138.79, 138.00, 137.66, 129.88, 128.64, 127.74, 127.43, 125.90, 120.49, 118.37, 109.86, 109.05, 64.69, 52.36, 47.52, 46.27, 26.95. HRMS (ESI) calcd for C<sub>23</sub>H<sub>19</sub>NO<sub>2</sub> [M+H]<sup>+</sup>: 342.1489, found: 342.1496. The enantiomeric excess was determined to be 97% by HPLC analysis on Chiralpak OD column (30% isopropanol/hexane, 1 mL/min), UV 254 nm, *t*<sub>1</sub> (minor) = 22.1 min, *t*<sub>2</sub> (major) = 33.3 min.

**(4a*S*,11a*S*,11b*S*)-11-benzyl-2,3-dimethyl-5,11,11a,11b-tetrahydro-1*H*-benzo[*a*]carbazole-1,4(4a*H*)-dione (3c)**

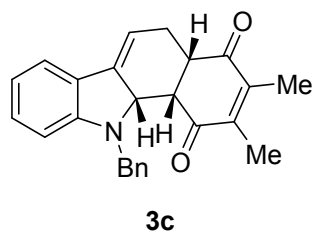

Yellow solid, 18mg, yield: 95%; M.P.: 150 – 152 °C.  $[\alpha]_D^{20} = +174.3^\circ$  (c 0.54, CHCl<sub>3</sub>). <sup>1</sup>H NMR (600 MHz, CDCl<sub>3</sub>)  $\delta$  7.34 – 7.26 (m, 5H), 7.25 – 7.22 (m, 1H), 7.13 (t, *J* = 7.4 Hz, 1H), 6.69 (dt, *J* = 24.8, 6.1 Hz, 2H), 5.71 (dd, *J* = 7.9, 3.8 Hz, 1H), 4.44 (q, *J* = 15.8 Hz, 2H), 4.10 – 4.03 (m, 1H), 3.32 (t, *J* = 5.2 Hz, 1H), 3.20 – 3.15 (m, 1H), 2.48 (ddt, *J* = 18.5, 7.4, 3.6 Hz, 1H), 2.34 (dtd, *J* = 13.3, 8.7, 4.2 Hz, 1H), 1.87 (d, *J* = 9.0 Hz, 6H). <sup>13</sup>C NMR (151 MHz, CDCl<sub>3</sub>)  $\delta$  199.98, 197.18, 153.84, 146.13, 141.89, 138.81, 138.03, 129.80, 128.57, 127.79, 127.38, 125.93, 120.47, 118.17, 109.77, 108.70, 64.50, 51.87, 47.51, 45.73, 27.42, 13.15, 12.61. HRMS (ESI) calcd for C<sub>25</sub>H<sub>23</sub>NO<sub>2</sub> [M+H]<sup>+</sup>: 370.1802, found: 370.1810. The enantiomeric excess was determined to be 98% by HPLC analysis on Chiralpak OD column (20% isopropanol/hexane, 1 mL/min), UV 254 nm *t*<sub>1</sub> (minor) = 11.5 min, *t*<sub>2</sub> (major) = 13.4 min.

**(4a*S*,11a*S*,11b*S*)-11-benzyl-3-methyl-5,11,11a,11b-tetrahydro-1*H*-benzo[*a*]carbazole-1,4(4a*H*)-dione and (4a*S*,11a*S*,11b*S*)-11-benzyl-2-methyl-5,11,11a,11b-tetrahydro-1*H*-benzo[*a*]carbazole-1,4 (4a*H*)-dione (3d and 3d')**

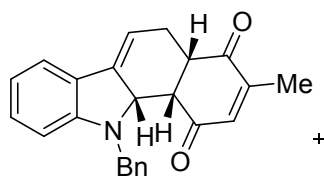

**3d and 3d'**

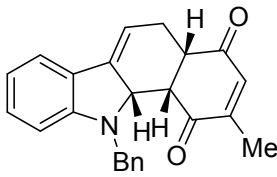

Orange solid, 17mg, yield: 93%; M.P.: 174 – 176 °C.  $[\alpha]_D^{20} = +180.0^\circ$  (c 0.5, CHCl<sub>3</sub>). <sup>1</sup>H NMR (600 MHz, CDCl<sub>3</sub>)  $\delta$  7.32 – 7.27 (m, 6H), 7.18 – 7.08 (m, 1H), 6.74–6.61 (m, 2H), 6.36 (d, *J* = 39.3 Hz, 1H), 5.77 – 5.68 (m, 1H), 4.53 – 4.34 (m, 2H), 4.11 – 4.04 (m, 1H), 3.32 (dt, *J* = 34.8, 5.2 Hz, 1H), 3.20 – 3.10 (m, 1H), 2.50 (ddd, *J* = 14.8, 7.5, 3.7 Hz, 1H), 2.40 (dtd, *J* = 13.5, 8.9, 4.3 Hz, 1H), 1.89 (t, *J* = 13.5 Hz, 3H). <sup>13</sup>C NMR (101 MHz, CDCl<sub>3</sub>)  $\delta$  200.00, 197.51, 153.85, 151.12, 138.65, 137.98, 137.42, 134.53, 129.81, 128.79, 128.57, 127.87, 127.74, 125.96, 120.49, 118.34, 118.12, 109.91, 108.87, 76.70, 64.57, 52.14, 47.81, 46.34, 27.12, 16.10. HRMS (ESI) calcd for C<sub>24</sub>H<sub>21</sub>NO<sub>2</sub> [M+H]<sup>+</sup>: 356.1645, found: 356.1653. The enantiomeric excess was determined to be 82% and 96% by HPLC analysis on Chiralpak IA column (15% isopropanol/hexane, 1 mL/min), UV 254 nm, 3d: *t*<sub>1</sub> (minor) = 7.8 min, *t*<sub>2</sub> (major) = 8.5 min; 3d': *t*<sub>1</sub> (minor) = 9.9 min, *t*<sub>2</sub> (major) = 10.6 min.

**(5a*S*,12a*S*,12b*S*)-12-benzyl-4-hydroxy-6,12,12a,12b-tetrahydro-5*H*-naphth**

**o[2,3-*a*]carbazole-5,13(5*aH*)-dione and  
(5*aS*,12*aS*,12*bS*)-12-benzyl-1-hydroxy-6,12,12*a*,12*b*-tetrahydro-5*H*-naphth  
o[2,3-*a*]carbazole-5,13(5*aH*)-dione (3*e* and 3*e'*)**

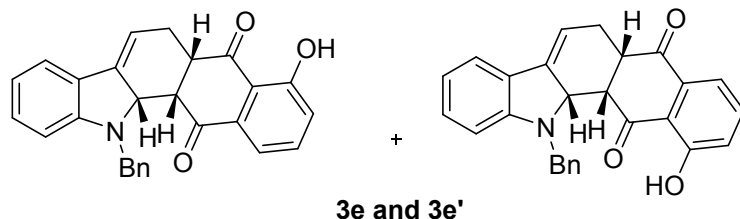

Orange solid, 17mg, yield: 85%; M.P.: 179 – 181 °C.  $[\alpha]^{20}_D = +172.0^\circ$  (c 0.42, CHCl<sub>3</sub>). <sup>1</sup>H NMR (600 MHz, CDCl<sub>3</sub>)  $\delta$  11.89 (s,

0.87H), 11.81 (s, 0.05H), 7.59 (t, *J* = 7.9 Hz, 1H), 7.36 – 7.28 (m, 4H), 7.26 – 7.11 (m, 5H), 6.78 – 6.62 (m, 2H), 5.68 (d, *J* = 3.6 Hz, 1H), 4.53 – 4.37 (m, 2H), 4.24 – 4.22 (m, 0.07H), 4.20 – 4.13 (m, 0.93H), 3.49 (t, *J* = 4.3 Hz, 0.07H), 3.46 (t, *J* = 4.4 Hz, 0.93H), 3.36 – 3.27 (m, 1H), 2.77 – 2.69 (m, 1H), 2.41 – 2.30 (m, 1H). <sup>13</sup>C NMR (151 MHz, CDCl<sub>3</sub>)  $\delta$  202.10, 197.71, 160.88, 153.82, 138.96, 137.96, 136.64, 132.58, 130.19, 128.69, 127.66, 127.53, 125.86, 124.50, 120.51, 118.67, 118.30, 109.71, 108.69, 65.29, 52.28, 47.21, 46.37, 26.66. HRMS (ESI) calcd for C<sub>27</sub>H<sub>21</sub>NO<sub>3</sub> [M+H]<sup>+</sup>: 408.1594, found: 408.1605. The enantiomeric excess was determined to be 97% and 97% by HPLC analysis on Chiralpak AD column (20% isopropanol/hexane, 1 mL/min), UV 365 nm, 3*e*: *t*<sub>1</sub> (minor) = 9.07 min, *t*<sub>2</sub> (major) = 11.48 min; 3*e'*: *t*<sub>1</sub> (minor) = 10.13 min, *t*<sub>2</sub> (major) = 13.23 min.

**(5*aS*,12*aS*,12*bS*)-12-benzyl-1,4-dihydroxy-6,12,12*a*,12*b*-tetrahydro-5*H*-na  
phtho[2,3-*a*]carbazole-5,13(5*aH*)-dione (3*f*)**

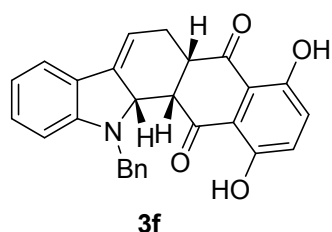

Purple solid, 20mg, yield: 96%; M.P.: 182 – 184 °C.  $[\alpha]^{20}_D = +251.3^\circ$  (c 0.19, CHCl<sub>3</sub>). <sup>1</sup>H NMR (600 MHz, CDCl<sub>3</sub>)  $\delta$  12.39 (s, 1H), 11.60 (s, 1H), 7.34 (d, *J* = 7.0 Hz, 2H), 7.28 (d, *J* = 7.0 Hz, 2H), 7.23 – 7.14 (m, 5H), 6.73 (t, *J* = 7.4 Hz, 1H), 6.68 (d, *J* = 8.0 Hz, 1H), 5.70 (s, 1H), 4.47 (dd, *J* = 46.4, 15.8 Hz, 2H), 4.26 – 4.17 (m, 1H), 3.44 (t, *J* = 5.2 Hz, 1H), 3.28 – 3.19 (m, 1H), 2.77 – 2.68 (m, 1H), 2.42 – 2.35 (m, 1H). <sup>13</sup>C NMR (151 MHz, CDCl<sub>3</sub>)  $\delta$  204.01, 200.62, 172.84, 155.90, 154.36, 153.88, 138.83, 137.96, 134.62, 130.17, 128.98, 128.66, 128.01, 127.62, 127.51, 125.81, 120.50, 118.35, 114.09, 111.99, 111.87, 109.54, 108.73, 65.04, 52.32, 46.44, 45.86, 27.51. HRMS (ESI) calcd for C<sub>27</sub>H<sub>21</sub>NO<sub>4</sub> [M+H]<sup>+</sup>: 424.1543, found: 424.1548. The enantiomeric excess was determined to be 85% by HPLC analysis on Chiralpak IA column (15% isopropanol/hexane, 1 mL/min), UV 254 nm, *t*<sub>1</sub> (minor) = 8.92 min, *t*<sub>2</sub> (major) = 11.21 min.

**(4*aS*,11*aS*,11*bS*)-11-benzyl-2,3-dichloro-5,11,11*a*,11*b*-tetrahydro-1*H*-benz**

**o[a]carbazole-1,4(4aH)-dione (3h)**

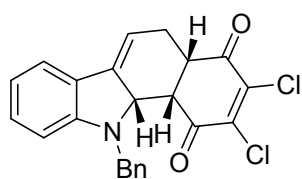

**3h**

Red brown solid, 15mg, yield: 75%; M.P.: 134 – 136 °C.  $[\alpha]^{20}_D = +146.3^\circ$  (c 0.35, CHCl<sub>3</sub>). <sup>1</sup>H NMR (600 MHz, CDCl<sub>3</sub>)  $\delta$  7.34 – 7.26 (m, 6H), 7.16 (t, *J* = 7.4 Hz, 1H), 6.74 (t, *J* = 7.4 Hz, 1H), 6.69 (d, *J* = 8.0 Hz, 1H), 5.76 – 5.68 (m, 1H), 4.51 (d, *J* = 15.6 Hz, 1H), 4.34 (d, *J* = 15.6 Hz, 1H), 4.16 – 4.08 (m, 1H), 3.35 (td, *J* = 8.3, 5.4 Hz, 1H), 3.29 (t, *J* = 5.0 Hz, 1H), 2.61 – 2.56 (m, 1H), 2.45 – 2.37 (m, 1H). <sup>13</sup>C NMR (151 MHz, CDCl<sub>3</sub>)  $\delta$  189.57, 185.91, 153.88, 144.91, 142.50, 138.97, 137.72, 130.21, 128.73, 127.82, 127.68, 125.58, 120.61, 118.68, 109.32, 109.15, 64.63, 52.52, 47.42, 45.21, 26.92. HRMS (ESI) calcd for C<sub>23</sub>H<sub>17</sub>Cl<sub>2</sub>NO<sub>2</sub> [M+H]<sup>+</sup>: 410.0709, found: 410.0709. The enantiomeric excess was determined to be 29% by HPLC analysis on Chiralpak IA column (20% isopropanol/hexane, 1 mL/min), UV 254 nm, *t*<sub>1</sub> (minor) = 7.88 min, *t*<sub>2</sub> (major) = 8.82 min.

**(5aS,12aS,12bS)-12-benzyl-8-bromo-6,12,12a,12b-tetrahydro-5H-naphtho[2,3-a]carbazole-5,13(5aH)-dione (4b)**

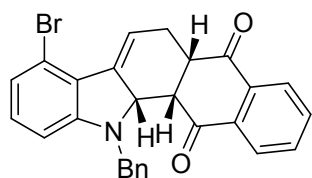

**4b**

Yellow solid, 22mg, yield: 92%; M.P.: 152 – 154 °C.  $[\alpha]^{20}_D = +120.4^\circ$  (c 0.51, CHCl<sub>3</sub>). <sup>1</sup>H NMR (600 MHz, CDCl<sub>3</sub>)  $\delta$  8.07 – 8.01 (m, 1H), 7.91 – 7.85 (m, 1H), 7.72 (dd, *J* = 5.3, 3.4 Hz, 2H), 7.29 (d, *J* = 7.9 Hz, 4H), 7.21 (t, *J* = 6.5 Hz, 1H), 6.93 (t, *J* = 8.0 Hz, 1H), 6.83 (d, *J* = 7.9 Hz, 1H), 6.55 (d, *J* = 7.9 Hz, 1H), 6.49 (d, *J* = 3.5 Hz, 1H), 4.51 – 4.40 (m, 2H), 4.31 – 4.27 (m, 1H), 3.59 (t, *J* = 4.2 Hz, 1H), 3.36 (dd, *J* = 15.0, 8.0 Hz, 1H), 2.78 – 2.71 (m, 1H), 2.39 – 2.30 (m, 1H). <sup>13</sup>C NMR (151 MHz, CDCl<sub>3</sub>)  $\delta$  198.05, 194.80, 155.76, 137.44, 137.08, 135.16, 134.63, 134.08, 132.42, 130.25, 128.71, 127.48, 127.25, 126.37, 122.40, 117.97, 114.70, 106.92, 64.78, 51.38, 47.15, 46.86, 27.12. HRMS (ESI) calcd for C<sub>27</sub>H<sub>20</sub>BrNO<sub>2</sub> [M+H]<sup>+</sup>: 470.0750, found: 470.0752. The enantiomeric excess was determined to be 91% by HPLC analysis on Chiralpak IA column (15% isopropanol/hexane, 1 mL/min), UV 254 nm, *t*<sub>1</sub> (minor) = 9.67 min, *t*<sub>2</sub> (major) = 10.53 min.

**(5aS,12aS,12bS)-12-benzyl-8-chloro-6,12,12a,12b-tetrahydro-5H-naphtho[2,3-a]carbazole-5,13(5aH)-dione (4c)**

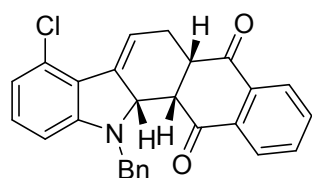

**4c**

Yellow solid, 20mg, yield: 96%; M.P.: 182 – 184 °C.  $[\alpha]^{20}_D = +208.9^\circ$  (c 0.37, CHCl<sub>3</sub>). <sup>1</sup>H NMR (600 MHz, CDCl<sub>3</sub>)  $\delta$  8.15 – 7.94 (m, 1H), 7.93 – 7.81 (m, 1H), 7.79 – 7.61 (m, 2H), 7.24 (d, *J* = 33.5 Hz, 5H), 7.01 (t, *J* = 7.2 Hz, 1H), 6.65 (d, *J* = 7.4 Hz, 1H), 6.51 (d, *J* = 7.4 Hz, 1H), 6.34 (d, *J* = 3.7 Hz, 1H), 4.46 (dd, *J* = 42.2, 15.9 Hz, 2H), 4.34 – 4.19 (m, 1H), 3.73 – 3.47 (m, 1H), 3.45 – 3.25 (m, 1H), 2.86 – 2.56 (m, 1H), 2.45 – 2.13 (m, 1H). <sup>13</sup>C NMR (151 MHz, CDCl<sub>3</sub>)  $\delta$  198.13, 194.92, 155.48, 137.47, 136.47, 135.14, 134.68, 134.13, 132.38,



130.08, 129.70, 128.72, 127.50, 127.26, 126.38, 122.87, 119.19, 114.94, 106.43, 64.74, 51.43, 47.16, 46.84, 27.27. HRMS (ESI) calcd for  $C_{27}H_{20}ClNO_2$   $[M+H]^+$ : 426.1255, found: 426.1256. The enantiomeric excess was determined to be 93% by HPLC analysis on Chiralpak IA column (15% isopropanol/hexane, 1 mL/min), UV 254 nm,  $t_1$  (minor) = 9.23 min,  $t_2$  (major) = 10.00 min.

**(5a*S*,12a*S*,12b*S*)-12-benzyl-9-bromo-6,12,12a,12b-tetrahydro-5*H*-naphtho[2,3-*a*]carbazole-5,13(5a*H*)-dione (4d)**

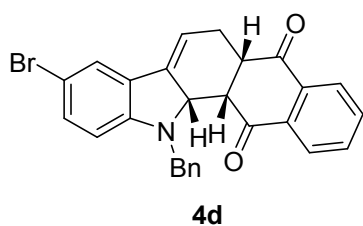

Yellow solid, 23mg, yield: 96%; M.P.: 150 – 152 °C.  $[\alpha]_D^{20} = +116.7^\circ$  (c 0.6,  $CHCl_3$ ).  $^1H$  NMR (600 MHz,  $CDCl_3$ )  $\delta$  8.06 – 7.99 (m, 1H), 7.89 – 7.83 (m, 1H), 7.74 – 7.68 (m, 2H), 7.34 (d,  $J = 1.7$  Hz, 1H), 7.27 (dt,  $J = 15.0, 7.3$  Hz, 4H), 7.23 – 7.17 (m, 2H), 6.51 (d,  $J = 8.5$  Hz, 1H), 5.68 (q,  $J = 3.7$  Hz, 1H), 4.43 (s, 2H), 4.21 (p,  $J = 4.0$  Hz, 1H), 3.53 (t,  $J = 4.4$  Hz, 1H), 3.35 (ddd,  $J = 10.8, 7.9, 4.7$  Hz, 1H), 2.70 – 2.67 (m, 1H), 2.35 – 2.26 (m, 1H).  $^{13}C$  NMR (151 MHz,  $CDCl_3$ )  $\delta$  197.92, 194.84, 152.76, 137.52, 135.18, 134.65, 134.06, 132.25, 128.69, 128.19, 127.58, 127.52, 127.24, 126.35, 123.38, 111.13, 109.96, 109.93, 65.04, 51.77, 47.41, 47.09, 26.88. HRMS (ESI) calcd for  $C_{27}H_{20}BrNO_2$   $[M+H]^+$ : 470.0750, found: 470.0753. The enantiomeric excess was determined to be 95% by HPLC analysis on Chiralpak IA column (15% isopropanol/hexane, 1 mL/min), UV 254 nm,  $t_1$  (minor) = 11.01 min,  $t_2$  (major) = 15.31 min.

The relative configuration of the title compound was tentatively assigned by means of NMR NOESY experiments. Irradiation at 3.35 ppm ( $H_{5a}$ ) gives a signal at 4.21 ppm ( $H_{12b}$ ). Irradiation at 4.21 ppm ( $H_{12b}$ ) gives signals at 3.35 ppm ( $H_{5a}$ ) and 3.53 ppm ( $H_{12a}$ ). Therefore, a 5a,12b-*cis* and 12a,12b-*cis* configuration can be assumed.

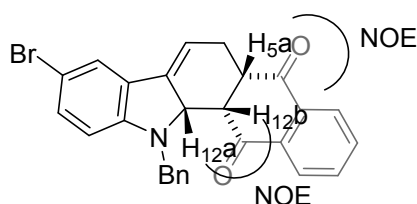

**(5a*S*,12a*S*,12b*S*)-12-benzyl-9-chloro-6,12,12a,12b-tetrahydro-5*H*-naphtho[2,3-*a*]carbazole-5,13(5a*H*)-dione (4e)**

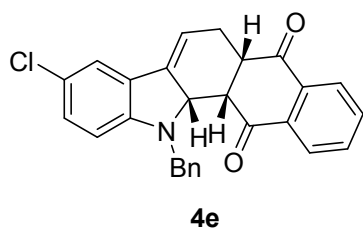

Yellow solid, 21mg, yield: 98%; M.P.: 161 – 163 °C.  $[\alpha]_D^{20} = +140.0^\circ$  (c 0.5,  $CHCl_3$ );  $^1H$  NMR (400 MHz,  $CDCl_3$ )  $\delta$  8.02 (dt,  $J = 7.4, 3.3$  Hz, 1H), 7.92 – 7.81 (m, 1H), 7.77 – 7.66 (m, 2H), 7.33 – 7.18 (m, 6H), 7.07 (dd,  $J = 8.5, 2.1$  Hz, 1H), 6.55 (d,  $J = 8.5$  Hz, 1H), 5.69 (q,  $J = 3.8$  Hz, 1H), 4.44 (s, 2H), 4.22 (p,  $J = 4.1$  Hz, 1H), 3.52 (t,  $J = 4.5$  Hz, 1H), 3.36 (ddd,  $J = 10.7, 7.8, 4.7$  Hz,

1H), 2.67 (ddt,  $J = 19.5, 7.8, 3.8$  Hz, 1H), 2.30 (ddt,  $J = 19.5, 10.7, 4.4$  Hz, 1H).  $^{13}\text{C}$  NMR (101 MHz,  $\text{CDCl}_3$ )  $\delta$  196.88, 193.81, 151.39, 136.64, 136.61, 134.21, 133.61, 133.02, 131.35, 128.41, 127.66, 126.58, 126.48, 126.21, 125.32, 121.98, 119.49, 110.05, 108.41, 64.20, 50.98, 46.41, 46.15, 25.87. HRMS (ESI) calcd for  $\text{C}_{27}\text{H}_{20}\text{ClNO}_2$   $[\text{M}+\text{H}]^+$ : 426.1255, found: 426.1259. The enantiomeric excess was determined to be 96% by HPLC analysis on Chiralpak IA column (15% isopropanol/hexane, 1 mL/min), UV 254 nm,  $t_1$  (minor) = 11.61 min,  $t_2$  (major) = 15.70 min.

**(5a*S*,12a*S*,12b*S*)-12-benzyl-10-bromo-6,12,12a,12b-tetrahydro-5*H*-naphtho[2,3-*a*]carbazole-5,13(5a*H*)-dione (4f)**

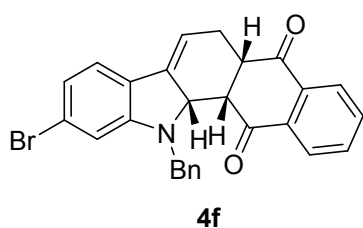

Yellow solid, 22mg, yield: 95%; M.P.: 152 – 154 °C.  $[\alpha]_{\text{D}}^{20} = +232.2^\circ$  (c 0.31,  $\text{CHCl}_3$ ).  $^1\text{H}$  NMR (600 MHz,  $\text{CDCl}_3$ )  $\delta$  8.05 – 7.99 (m, 1H), 7.89 – 7.83 (m, 1H), 7.74 – 7.68 (m, 2H), 7.29 – 7.27 (m, 4H), 7.21 (t,  $J = 6.5$  Hz, 1H), 7.10 (d,  $J = 7.8$  Hz, 1H), 6.86 – 6.77 (m, 2H), 5.67 (d,  $J = 3.4$  Hz, 1H), 4.44 (s, 2H), 4.27 – 4.19 (m, 1H), 3.51 (t,  $J = 4.2$  Hz, 1H), 3.39 – 3.28 (m, 1H), 2.67 – 2.62 (m, 1H), 2.33 – 2.20 (m, 1H).  $^{13}\text{C}$  NMR (151 MHz,  $\text{CDCl}_3$ )  $\delta$  198.01, 194.90, 154.82, 137.61, 137.33, 135.15, 134.69, 134.10, 132.34, 128.75, 127.58, 127.26, 126.36, 125.19, 123.73, 121.43, 120.86, 111.43, 110.46, 64.90, 51.44, 47.34, 47.01, 26.87. HRMS (ESI) calcd for  $\text{C}_{27}\text{H}_{20}\text{BrNO}_2$   $[\text{M}+\text{H}]^+$ : 470.0750, found: 470.0767. The enantiomeric excess was determined to be 90% by HPLC analysis on Chiralpak OD column (15% isopropanol/hexane, 1 mL/min), UV 254 nm,  $t_1$  (major) = 14.57 min,  $t_2$  (minor) = 21.78 min.

**(5a*S*,12a*S*,12b*S*)-12-benzyl-10-fluoro-6,12,12a,12b-tetrahydro-5*H*-naphtho[2,3-*a*]carbazole-5,13(5a*H*)-dione (4g)**

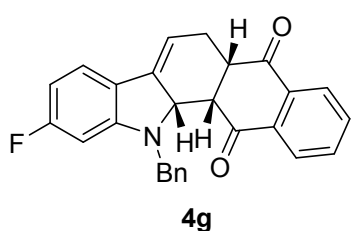

Yellow solid, 20mg, yield: 96%; M.P.: 152 – 154 °C.  $[\alpha]_{\text{D}}^{20} = +280.0^\circ$  (c 0.1,  $\text{CHCl}_3$ ).  $^1\text{H}$  NMR (600 MHz,  $\text{CDCl}_3$ )  $\delta$  8.06 – 7.99 (m, 1H), 7.90 – 7.85 (m, 1H), 7.74 – 7.70 (m, 2H), 7.29 (dd,  $J = 12.8, 7.2$  Hz, 4H), 7.24 – 7.14 (m, 2H), 6.43 – 6.32 (m, 2H), 5.61 (q,  $J = 3.6$  Hz, 1H), 4.48 – 4.41 (m, 2H), 4.25 (p,  $J = 3.9$  Hz, 1H), 3.54 (t,  $J = 4.7$  Hz, 1H), 3.35 (ddd,  $J = 10.8, 8.0, 4.7$  Hz, 1H), 2.66 (ddt,  $J = 15.1, 7.5, 3.6$  Hz, 1H), 2.33 – 2.24 (m, 1H).  $^{13}\text{C}$  NMR (151 MHz,  $\text{CDCl}_3$ )  $\delta$  198.10, 194.95, 137.55, 137.36, 135.17, 134.65, 134.09, 132.39, 128.74, 127.59, 127.57, 127.25, 126.37, 122.11, 121.24, 121.17, 109.02, 104.61, 104.46, 96.30, 96.12, 65.25, 51.49, 47.40, 47.01, 26.82. HRMS (ESI) calcd for  $\text{C}_{27}\text{H}_{20}\text{FNO}_2$   $[\text{M}+\text{H}]^+$ : 410.1551, found: 410.1554. The enantiomeric excess was determined to be 85% by HPLC analysis on Chiralpak OD column (20% isopropanol/hexane, 1 mL/min), UV 254 nm,  $t_1$  (major) = 12.74 min,  $t_2$  (minor) = 19.19 min.

**(5a*S*,12a*S*,12b*S*)-12-benzyl-9-methyl-6,12,12a,12b-tetrahydro-5*H*-naphtho[2,3-*a*]carbazole-5,13(5a*H*)-dione (4h)**

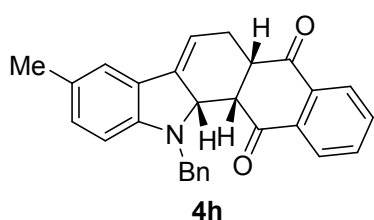

Orange solid, 19mg, yield: 95%; M.P.: 162 – 164 °C.  $[\alpha]^{20}_D = +181.4^\circ$  (c 0.47, CHCl<sub>3</sub>). <sup>1</sup>H NMR (600 MHz, CDCl<sub>3</sub>)  $\delta$  8.12 – 8.07 (m, 1H), 8.01 (d, *J* = 4.7 Hz, 1H), 7.86 (d, *J* = 4.7 Hz, 1H), 7.77 (d, *J* = 3.5 Hz, 1H), 7.72 – 7.68 (m, 2H), 7.33 (d, *J* = 7.3 Hz, 1H), 7.24 (d, *J* = 7.3 Hz, 1H), 7.18 (d, *J* = 7.5 Hz, 1H), 7.00 – 6.94 (m, 2H), 6.60 (d, *J* = 8.0 Hz, 1H), 5.65 (d, *J* = 3.1 Hz, 1H), 4.48 (d, *J* = 15.6 Hz, 1H), 4.37 (d, *J* = 15.5 Hz, 1H), 4.13 (s, 1H), 3.46 (d, *J* = 3.7 Hz, 1H), 3.37 (d, *J* = 11.2 Hz, 1H), 2.65 (d, *J* = 19.0 Hz, 1H), 2.35 – 2.23 (m, 4H). <sup>13</sup>C NMR (151 MHz, CDCl<sub>3</sub>)  $\delta$  198.35, 194.99, 152.04, 138.85, 138.35, 135.42, 134.57, 133.87, 132.37, 130.46, 128.56, 127.76, 127.58, 127.31, 127.15, 126.34, 120.99, 109.16, 108.93, 65.55, 52.95, 47.70, 47.51, 26.92, 20.78. HRMS (ESI) calcd for C<sub>28</sub>H<sub>23</sub>NO<sub>2</sub> [M+H]<sup>+</sup>: 406.1802, found: 406.1812. The enantiomeric excess was determined to be 92% by HPLC analysis on Chiralpak IA column (10% isopropanol/hexane, 1 mL/min), UV 254 nm, *t*<sub>1</sub> (minor) = 10.59 min, *t*<sub>2</sub> (major) = 15.50 min.

**(5a*S*,12a*S*,12b*S*)-12-benzyl-9-methoxy-6,12,12a,12b-tetrahydro-5*H*-naphtho[2,3-*a*]carbazole-5,13(5a*H*)-dione (4i)**

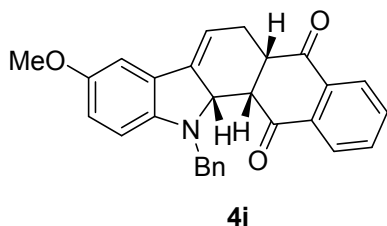

Orange solid, 19mg, yield: 92%; M.P.: 144 – 146 °C.  $[\alpha]^{20}_D = +176.7^\circ$  (c 0.43, CHCl<sub>3</sub>, 85% ee). <sup>1</sup>H NMR (600 MHz, CDCl<sub>3</sub>)  $\delta$  8.06 – 7.95 (m, 1H), 7.91 – 7.81 (m, 1H), 7.75 – 7.63 (m, 2H), 7.34 (d, *J* = 7.4 Hz, 2H), 7.23 (d, *J* = 7.4 Hz, 2H), 7.18 (t, *J* = 7.2 Hz, 1H), 6.87 (d, *J* = 1.5 Hz, 1H), 6.79 – 6.73 (m, 1H), 6.61 (d, *J* = 8.6 Hz, 1H), 5.66 (d, *J* = 3.4 Hz, 1H), 4.48 (d, *J* = 15.4 Hz, 1H), 4.29 (d, *J* = 15.4 Hz, 1H), 4.14 – 4.07 (m, 1H), 3.76 (s, 3H), 3.44 – 3.31 (m, 2H), 2.71 – 2.59 (m, 1H), 2.31 (ddd, *J* = 15.0, 9.9, 4.6 Hz, 1H). <sup>13</sup>C NMR (151 MHz, CDCl<sub>3</sub>)  $\delta$  198.20, 195.03, 153.27, 148.80, 138.86, 138.44, 135.49, 134.57, 133.85, 132.35, 128.55, 127.84, 127.34, 127.14, 126.32, 116.23, 110.13, 109.69, 106.04, 66.23, 66.18, 56.10, 56.05, 54.00, 47.73, 26.92. HRMS (ESI) calcd for C<sub>28</sub>H<sub>23</sub>NO<sub>3</sub> [M+H]<sup>+</sup>: 422.1751, found: 422.1760. The enantiomeric excess was determined to be 85% by HPLC analysis on Chiralpak IA column (15% isopropanol/hexane, 1 mL/min), UV 254 nm, *t*<sub>1</sub> (minor) = 13.42 min, *t*<sub>2</sub> (major) = 18.99 min.

**(5a*S*,12a*S*,12b*S*)-12-benzyl-10-methoxy-6,12,12a,12b-tetrahydro-5*H*-naphtho[2,3-*a*]carbazole-5,13(5a*H*)-dione (4j)**

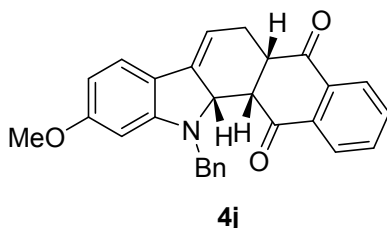

Orange solid, 20mg, yield: 93%; M.P.: 140 – 142 °C.  $[\alpha]^{20}_D = +210.0^\circ$  (c 0.29, CHCl<sub>3</sub>). <sup>1</sup>H NMR (600 MHz, CDCl<sub>3</sub>)  $\delta$  8.04 – 7.99 (m, 1H), 7.89 – 7.84 (m, 1H), 7.72 – 7.64 (m, 2H), 7.31 (d, *J* = 7.2 Hz,

2H), 7.26 (s, 1H), 7.25 – 7.15 (m, 3H), 6.33 – 6.18 (m, 2H), 5.51 (d,  $J = 2.6$  Hz, 1H), 4.51 – 4.40 (m, 2H), 4.25 – 4.13 (m, 1H), 3.76 (s, 3H), 3.55 – 3.44 (m, 1H), 3.33 (dd,  $J = 14.9, 7.8$  Hz, 1H), 2.72 – 2.56 (m, 1H), 2.32 – 2.24 (m, 1H).  $^{13}\text{C}$  NMR (151 MHz,  $\text{CDCl}_3$ )  $\delta$  198.42, 195.08, 162.04, 155.34, 138.14, 137.91, 135.29, 134.57, 133.96, 132.44, 128.65, 127.67, 127.41, 127.19, 126.36, 121.15, 119.41, 107.08, 103.72, 94.91, 65.37, 55.38, 51.79, 47.56, 47.19, 26.85. HRMS (ESI) calcd for  $\text{C}_{28}\text{H}_{23}\text{NO}_3$   $[\text{M}+\text{H}]^+$ : 422.1751, found: 422.1748. The enantiomeric excess was determined to be 96% by HPLC analysis on Chiralpak AD column (15% isopropanol/hexane, 1 mL/min), UV 254 nm,  $t_1$  (major) = 22.08 min,  $t_2$  (minor) = 30.04 min.

**(5a*S*,12a*S*,12b*S*)-12-benzyl-11-methyl-6,12,12a,12b-tetrahydro-5*H*-naphtho[2,3-*a*]carbazole-5,13(5a*H*)-dione (4k)**

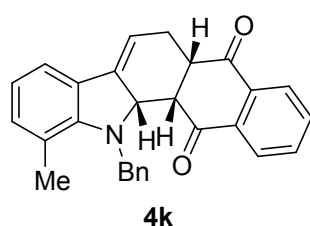

Yellow solid, 20mg, yield: 98%; M.P.: 163 – 165 °C.  $[\alpha]_{\text{D}}^{20} = +140.0^\circ$  (c 0.5,  $\text{CHCl}_3$ ).  $^1\text{H}$  NMR (600 MHz,  $\text{CDCl}_3$ )  $\delta$  8.01 – 7.96 (m, 1H), 7.89 – 7.84 (m, 1H), 7.69 (q,  $J = 8.2$  Hz, 2H), 7.36 (d,  $J = 7.4$  Hz, 2H), 7.24 (t,  $J = 7.5$  Hz, 2H), 7.17 (t,  $J = 7.5$  Hz, 2H), 6.98 (d,  $J = 7.4$  Hz, 1H), 6.73 (t,  $J = 7.4$  Hz, 1H), 5.62 (d,  $J = 3.5$  Hz, 1H), 4.92 (d,  $J = 16.5$  Hz, 1H), 4.34 (d,  $J = 16.5$  Hz, 1H), 4.11 – 4.04 (m, 1H), 3.34 (dd,  $J = 15.5, 7.2$  Hz, 2H), 2.70 – 2.58 (m, 1H), 2.41 (s, 3H), 2.30 – 2.24 (m, 1H).  $^{13}\text{C}$  NMR (151 MHz,  $\text{CDCl}_3$ )  $\delta$  198.40, 195.12, 152.66, 139.69, 139.28, 135.39, 134.55, 133.87, 133.23, 132.45, 128.57, 127.26, 126.24, 126.23, 120.97, 119.53, 118.34, 108.78, 67.42, 55.55, 48.14, 47.70, 26.89, 19.51. HRMS (ESI) calcd for  $\text{C}_{28}\text{H}_{23}\text{NO}_2$   $[\text{M}+\text{H}]^+$ : 406.1802, found: 406.1804. The enantiomeric excess was determined to be 97% by HPLC analysis on Chiralpak IA column (10% isopropanol/hexane, 1 mL/min), UV 254 nm,  $t_1$  (minor) = 8.73 min,  $t_2$  (major) = 9.45 min.

**(5a*S*,12a*S*,12b*S*)-12-benzyl-7-methyl-6,12,12a,12b-tetrahydro-5*H*-naphtho[2,3-*a*]carbazole-5,13(5a*H*)-dione (4l)**

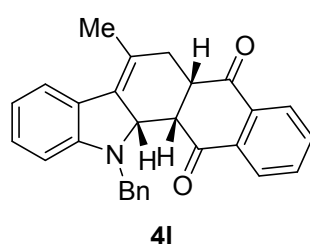

Yellow solid, 19mg, yield: 93%; M.P.: 139 – 141 °C.  $[\alpha]_{\text{D}}^{20} = +157.5^\circ$  (c 0.57,  $\text{CHCl}_3$ ).  $^1\text{H}$  NMR (600 MHz,  $\text{CDCl}_3$ )  $\delta$  8.05 – 7.99 (m, 1H), 7.87 – 7.82 (m, 1H), 7.70 (dd,  $J = 5.4, 3.5$  Hz, 2H), 7.39 (d,  $J = 7.4$  Hz, 1H), 7.32 (d,  $J = 7.4$  Hz, 2H), 7.26 (d,  $J = 14.9$  Hz, 3H), 7.19 (t,  $J = 7.2$  Hz, 1H), 7.10 (t,  $J = 7.7$  Hz, 1H), 6.72 (t,  $J = 7.5$  Hz, 1H), 6.62 (d,  $J = 8.0$  Hz, 1H), 4.44 (q,  $J = 16.1$  Hz, 2H), 4.26 – 4.14 (m, 1H), 3.55 (t,  $J = 4.4$  Hz, 1H), 3.37 – 3.31 (m, 1H), 2.69 – 2.52 (m, 1H), 2.25 – 2.17 (m, 1H), 1.88 (s, 3H).  $^{13}\text{C}$  NMR (151 MHz,  $\text{CDCl}_3$ )  $\delta$  198.26, 195.02, 154.33, 138.17, 135.52, 134.58, 133.90, 132.45, 131.07, 128.84, 128.59, 127.58, 127.23, 127.11, 126.98, 126.37, 123.81, 120.69, 117.90, 108.25, 65.88, 52.07, 47.55, 47.02, 33.91, 18.99. HRMS (ESI) calcd for  $\text{C}_{28}\text{H}_{23}\text{NO}_2$   $[\text{M}+\text{H}]^+$ : 406.1802, found: 406.1805. The enantiomeric excess

was determined to be >99% by HPLC analysis on Chiralpak IA column (10% isopropanol/hexane, 1 mL/min), UV 254 nm,  $t_1$  (minor) = 10.65 min,  $t_2$  (major) = 16.05 min.

**(5a*S*,6*S*,12a*S*,12b*S*)-12-benzyl-6-methyl-6,12,12a,12b-tetrahydro-5*H*-naphtho[2,3-*a*]carbazole-5,13(5a*H*)-dione (4m)**

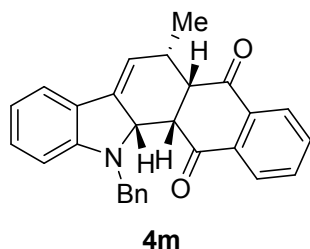

Orange solid, 14mg, yield: 70%; M.P.: 136 – 138 °C.  $[\alpha]_D^{20} = +135.6^\circ$  (c 0.64, CHCl<sub>3</sub>). <sup>1</sup>H NMR (600 MHz, CDCl<sub>3</sub>)  $\delta$  8.02 (dd,  $J = 5.0, 3.4$  Hz, 1H), 7.88 (dd,  $J = 5.0, 3.4$  Hz, 1H), 7.70 (dd,  $J = 5.0, 3.4$  Hz, 2H), 7.30 (dd,  $J = 23.7, 7.3$  Hz, 3H), 7.24 (d,  $J = 7.3$  Hz, 2H), 7.20 – 7.13 (m, 2H), 6.74 – 6.66 (m, 2H), 5.61 – 5.55 (m, 1H), 4.45 (d,  $J = 33.3$  Hz, 2H), 4.17 (d,  $J = 3.7$  Hz, 1H), 3.49 (t,  $J = 3.7$  Hz, 1H), 2.93 (dd,  $J = 10.0, 4.2$  Hz, 1H), 2.56 – 2.47 (m, 1H), 1.18 (d,  $J = 6.8$  Hz, 3H). <sup>13</sup>C NMR (151 MHz, CDCl<sub>3</sub>)  $\delta$  197.56, 194.71, 154.05, 138.15, 137.72, 135.38, 134.45, 133.88, 132.89, 129.92, 128.60, 127.71, 127.36, 127.15, 126.32, 126.02, 120.53, 118.22, 115.84, 108.81, 65.05, 56.17, 52.36, 48.80, 32.94, 20.04. HRMS (ESI) calcd for C<sub>28</sub>H<sub>23</sub>NO<sub>2</sub> [M+H]<sup>+</sup>: 406.1802, found: 406.1806. The enantiomeric excess was determined to be 83% by HPLC analysis on Chiralpak OD column (20% isopropanol/hexane, 1 mL/min), UV 365 nm,  $t_1$  (minor) = 11.82 min,  $t_2$  (major) = 17.83 min.

The relative configuration of the title compound was tentatively assigned by means of NMR NOESY experiments. Irradiation at 2.5 ppm (H<sub>5a</sub>) gives a signal at 2.93 ppm (H<sub>12b</sub>), 3.49 ppm (H<sub>12b</sub>) and 4.17 ppm (H<sub>12a</sub>). Therefore, a 5a,6,12a,12b-*cis* configuration can be assumed.

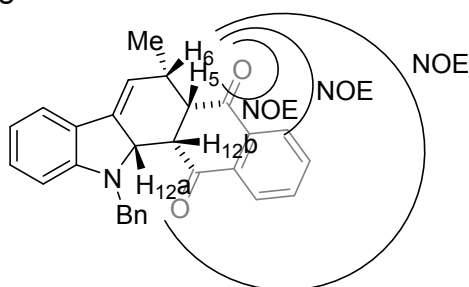

**(5a*S*,12a*S*,12b*S*)-6,12,12a,12b-tetrahydro-5*H*-naphtho[2,3-*a*]carbazole-5,13(5a*H*)-dione (4n)**

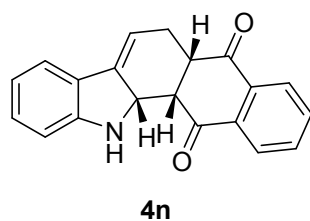

Orange solid, 12mg, yield: 77%; M.P.: 137 – 139 °C.  $[\alpha]_D^{20} = +233.1^\circ$  (c 0.36, CHCl<sub>3</sub>). <sup>1</sup>H NMR (600 MHz, CDCl<sub>3</sub>)  $\delta$  8.09 – 8.01 (m, 1H), 7.96 – 7.87 (m, 1H), 7.77 – 7.69 (m, 2H), 7.30 (d,  $J = 7.4$  Hz, 1H), 7.12 (t,  $J = 7.5$  Hz, 1H), 6.81 (dd,  $J = 16.8, 7.9$  Hz, 2H), 5.80 (d,  $J = 3.2$  Hz, 1H), 4.55 (s, 1H), 4.33 (s, 1H), 3.90 (t,  $J = 5.0$  Hz, 1H), 3.48 (dd,  $J = 14.3, 7.3$  Hz, 1H), 2.66 – 2.59 (m, 1H), 2.52 – 2.46 (m, 1H). <sup>13</sup>C NMR (151 MHz, CDCl<sub>3</sub>)  $\delta$  196.79, 195.21, 133.56, 133.11, 131.96,

128.55, 126.16, 125.52, 119.67, 118.96, 111.14, 109.90, 58.61, 47.93, 46.23, 25.55. HRMS (ESI) calcd for  $C_{20}H_{15}NO_2$   $[M+H]^+$ : 302.1176, found: 302.1172. The enantiomeric excess was determined to be 48% by HPLC analysis on Chiralpak IA column (20% isopropanol/hexane, 1 mL/min), UV 254 nm,  $t_1$  (minor) = 4.69 min,  $t_2$  (major) = 6.30 min.

**(5a*S*,12a*S*,12b*S*)-12-(4-methoxyphenyl)-6,12,12a,12b-tetrahydro-5*H*-naphtho[2,3-*a*]carbazole-5,13(5a*H*)-dione (4o)**

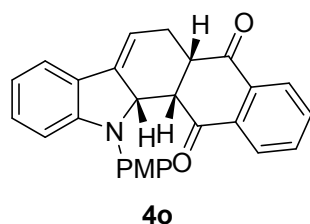

Yellow solid, 18mg, yield: 85%; M.P.: 132 – 134 °C.  $[\alpha]_D^{20} = +221.3^\circ$  (c 0.47,  $CHCl_3$ ).  $^1H$  NMR (600 MHz,  $CDCl_3$ )  $\delta$  8.04 (dd,  $J = 6.2, 2.7$  Hz, 1H), 7.91 – 7.87 (m, 1H), 7.75 – 7.69 (m, 2H), 7.32 (d,  $J = 7.3$  Hz, 1H), 7.24 (d,  $J = 8.8$  Hz, 2H), 7.09 (t,  $J = 7.5$  Hz, 1H), 6.90 (d,  $J = 8.8$  Hz, 2H), 6.81 – 6.66 (m, 2H), 5.72 (d,  $J = 3.6$  Hz, 1H), 4.79 – 4.73 (m, 1H), 3.95 – 3.84 (m, 2H), 3.79 (s, 2H), 3.48 (ddd,  $J = 12.2, 7.9, 4.7$  Hz, 1H), 2.75 (ddt,  $J = 14.9, 7.3, 3.5$  Hz, 1H), 2.43 – 2.33 (m, 1H).  $^{13}C$  NMR (151 MHz,  $CDCl_3$ )  $\delta$  198.28, 195.04, 151.78, 138.43, 135.46, 134.59, 134.09, 132.44, 129.74, 127.27, 126.53, 125.43, 120.58, 118.33, 114.86, 109.62, 108.52, 65.36, 55.49, 47.50, 46.65, 27.12. HRMS (ESI) calcd for  $C_{27}H_{21}NO_3$   $[M+Na]^+$ : 430.1414, found: 430.1413. The enantiomeric excess was determined to be 5% by HPLC analysis on Chiralpak IA column (20% isopropanol/hexane, 1 mL/min), UV 254 nm,  $t_1$  (minor) = 12.41 min,  $t_2$  (major) = 13.49 min.

**(5a*S*,12a*S*,12b*S*)-12-(4-methoxybenzyl)-6,12,12a,12b-tetrahydro-5*H*-naphtho[2,3-*a*]carbazole-5,13(5a*H*)-dione (4p)**

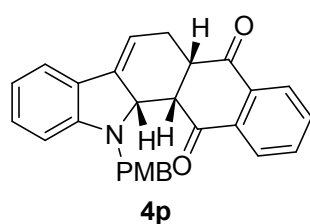

Orange solid, 20mg, yield: 93%; M.P.: 133 – 135 °C.  $[\alpha]_D^{20} = +121.7^\circ$  (c 0.86,  $CHCl_3$ ).  $^1H$  NMR (600 MHz,  $CDCl_3$ )  $\delta$  8.02 (dd,  $J = 5.9, 3.1$  Hz, 1H), 7.87 (dd,  $J = 5.9, 3.1$  Hz, 1H), 7.70 (dd,  $J = 5.1, 3.8$  Hz, 2H), 7.25 (dd,  $J = 21.8, 7.9$  Hz, 3H), 7.14 (t,  $J = 7.7$  Hz, 1H), 6.78 (d,  $J = 8.5$  Hz, 2H), 6.71 (t,  $J = 8.1$  Hz, 2H), 5.67 (dd,  $J = 6.9, 3.3$  Hz, 1H), 4.40 (dd,  $J = 45.4, 15.5$  Hz, 2H), 4.18 – 4.11 (m, 1H), 3.72 (s, 3H), 3.49 (t,  $J = 4.5$  Hz, 1H), 3.36 (ddd,  $J = 12.2, 7.8, 4.7$  Hz, 1H), 2.68 – 2.63 (m, 1H), 2.34 – 2.26 (m, 1H).  $^{13}C$  NMR (151 MHz,  $CDCl_3$ )  $\delta$  198.36, 195.07, 158.87, 153.96, 138.73, 135.35, 134.60, 133.94, 132.38, 129.98, 129.83, 128.95, 127.18, 126.35, 126.21, 120.47, 118.18, 113.96, 109.43, 108.94, 64.96, 55.24, 51.72, 47.68, 47.32, 26.92. HRMS (ESI) calcd for  $C_{28}H_{23}NO_3$   $[M+H]^+$ : 422.1751, found: 422.1752. The enantiomeric excess was determined to be 91% by HPLC analysis on Chiralpak IA column (10% isopropanol/hexane, 1 mL/min), UV 254 nm,  $t_1$  (minor) = 19.13 min,  $t_2$  (major) = 24.57 min.

**(5a*S*,12a*S*,12b*S*)-12-(4-(tert-butyl)benzyl)-6,12,12a,12b-tetrahydro-5*H*-naphtho[2,3-*a*]carbazole-5,13(5a*H*)-dione (4q)**

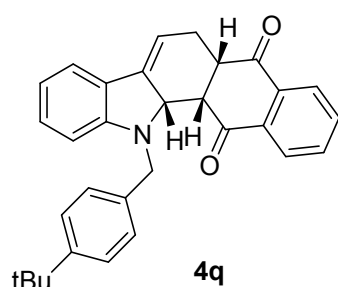

Yellow solid, 21mg, yield: 94%; M.P.: 146 – 148 °C.  $[\alpha]_D^{20} = +160.2^\circ$  (c 0.62, CHCl<sub>3</sub>). <sup>1</sup>H NMR (600 MHz, CDCl<sub>3</sub>)  $\delta$  8.02 (dd, *J* = 6.4, 2.4 Hz, 1H), 7.88 – 7.86 (m, 1H), 7.72 (ddd, *J* = 6.1, 5.4, 3.6 Hz, 2H), 7.32 – 7.26 (m, 5H), 7.18 (t, *J* = 7.6 Hz, 1H), 6.74 (dd, *J* = 12.3, 4.9 Hz, 2H), 5.69 (dd, *J* = 7.0, 3.4 Hz, 1H), 4.54 (d, *J* = 15.3 Hz, 1H), 4.36 (d, *J* = 15.3 Hz, 1H), 4.18 (dd, *J* = 8.0, 4.0 Hz, 1H), 3.39 – 3.33 (m, 2H), 2.67

(ddd, *J* = 15.6, 7.2, 3.6 Hz, 1H), 2.32 (ddd, *J* = 15.6, 7.2, 3.6 Hz, 1H), 1.21 (s, 9H). <sup>13</sup>C NMR (151 MHz, CDCl<sub>3</sub>)  $\delta$  198.26, 195.01, 153.95, 150.41, 138.66, 135.56, 135.01, 134.51, 133.76, 132.31, 129.81, 127.71, 127.11, 126.26, 126.14, 125.45, 120.46, 118.12, 109.42, 108.77, 65.00, 51.81, 47.67, 47.32, 34.40, 31.21, 26.89, 22.66, 14.12. HRMS (ESI) calcd for C<sub>31</sub>H<sub>29</sub>NO<sub>2</sub> [M+H]<sup>+</sup>: 448.2271, found: 448.2276. The enantiomeric excess was determined to be 96% by HPLC analysis on Chiralpak IA column (15% isopropanol/hexane, 1 mL/min), UV 254 nm, *t*<sub>1</sub> (minor) = 8.06 min, *t*<sub>2</sub> (major) = 10.37 min.

**(5a*S*,12a*S*,12b*S*)-12-(4-chlorobenzyl)-6,12,12a,12b-tetrahydro-5*H*-naphtho[2,3-*a*]carbazole-5,13(5a*H*)-dione (4r)**

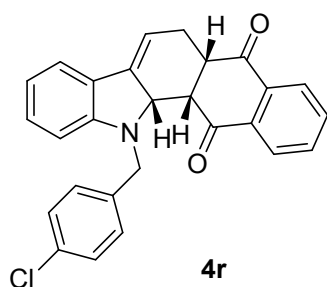

Yellow solid, 19mg, yield: 90%; M.P.: 162 – 164 °C.  $[\alpha]_D^{20} = +220.0^\circ$  (c 0.5, CHCl<sub>3</sub>). <sup>1</sup>H NMR (600 MHz, CDCl<sub>3</sub>)  $\delta$  8.08 – 8.00 (m, 1H), 7.87 (dd, *J* = 5.6, 3.2 Hz, 1H), 7.72 (dd, *J* = 5.6, 3.2 Hz, 2H), 7.29 (d, *J* = 7.3 Hz, 3H), 7.24 (d, *J* = 8.3 Hz, 2H), 7.13 (t, *J* = 7.7 Hz, 1H), 6.73 (t, *J* = 7.4 Hz, 1H), 6.58 (d, *J* = 8.0 Hz, 1H), 5.70 (dd, *J* = 7.0, 3.4 Hz, 1H), 4.41 (q, *J* = 16.2 Hz, 2H), 4.22 – 4.16 (m, 1H), 3.59 (t, *J* = 4.4 Hz, 1H),

3.43 – 3.36 (m, 1H), 2.68 (ddt, *J* = 14.8, 7.4, 3.5 Hz, 1H), 2.37 – 2.29 (m, 1H). <sup>13</sup>C NMR (151 MHz, CDCl<sub>3</sub>)  $\delta$  198.12, 194.91, 153.74, 138.50, 136.87, 135.26, 134.66, 134.06, 133.00, 132.41, 129.87, 128.83, 127.24, 126.36, 126.19, 120.52, 118.48, 109.76, 108.74, 65.49, 51.90, 47.61, 47.27, 26.93. HRMS (ESI) calcd for C<sub>27</sub>H<sub>20</sub>ClNO<sub>2</sub> [M+H]<sup>+</sup>: 426.1255, found: 426.1260. The enantiomeric excess was determined to be 79% by HPLC analysis on Chiralpak IA column (10% isopropanol/hexane, 1 mL/min), UV 254 nm, *t*<sub>1</sub> (minor) = 15.82 min, *t*<sub>2</sub> (major) = 23.34 min.

#### 4. General procedure for the reduction reaction of 4d<sup>6</sup>

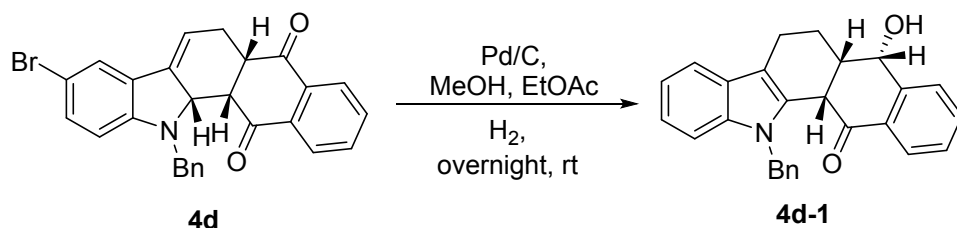

**4d** (70mg, 0.15mmol) was completely dissolved in EtOAc, and then 10 mol% Pd/C (70mg, 0.033mol) was added as a single portion. Anhydrous MeOH was then added by syringe at room temperature under a stream of hydrogen and the mixture was stirred overnight under hydrogen gas. The mixture was filtered through Celite, and the solvents were removed via rotary evaporation. The product was purified by flash chromatography (petroleum ether-ethyl acetate, 3:1) to give 50mg (85%) of a yellow solid.

#### (5*S*,5*aS*,12*bS*)-12-benzyl-5-hydroxy-5,5*a*,6,7,12,12*b*-hexahydro-13*H*-naphtho[2,3-*a*]carbazol-13-one (**4d-1**)

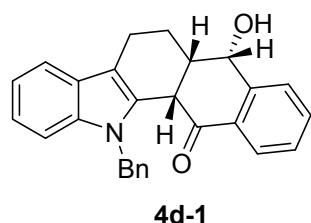

Light yellow solid, 34mg, yield: 85%; M.P.: 190 – 192 °C.  $[\alpha]_D^{20} = +193.7^\circ$  (c 0.32, CHCl<sub>3</sub>). <sup>1</sup>H NMR (600 MHz, CDCl<sub>3</sub>)  $\delta$  8.03 (d, *J* = 7.8 Hz, 1H), 7.75 (d, *J* = 7.8 Hz, 1H), 7.66 (t, *J* = 7.5 Hz, 1H), 7.50 (d, *J* = 7.7 Hz, 1H), 7.41 (t, *J* = 7.5 Hz, 1H), 7.26 – 7.19 (m, 4H), 7.15 (t, *J* = 7.6 Hz, 1H), 7.08 (t, *J* = 7.4 Hz, 1H), 6.96 (d, *J* = 7.4

Hz, 2H), 5.61 (dd, *J* = 44.3, 17.5 Hz, 2H), 5.27 (s, 1H), 3.75 (d, *J* = 3.4 Hz, 1H), 2.92 (dd, *J* = 16.0, 5.8 Hz, 1H), 2.76 (dd, *J* = 16.5, 10.6 Hz, 2H), 2.32 (d, *J* = 5.0 Hz, 1H), 2.14 (dd, *J* = 13.0, 5.3 Hz, 1H), 1.43 (dt, *J* = 12.9, 6.4 Hz, 1H). <sup>13</sup>C NMR (101 MHz, CDCl<sub>3</sub>)  $\delta$  195.28, 143.61, 138.70, 137.39, 134.64, 132.64, 130.11, 128.76, 127.85, 127.45, 127.14, 126.71, 125.96, 125.68, 121.70, 119.08, 118.35, 110.52, 109.69, 69.82, 47.14, 45.99, 43.71, 29.73, 20.46, 18.78. HRMS (ESI) calcd for C<sub>27</sub>H<sub>23</sub>NO<sub>2</sub> [M+H]<sup>+</sup>: 394.1802, found: 394.1800. The enantiomeric excess was determined to be 93% by HPLC analysis on Chiralpak IA column (20% isopropanol/hexane, 1 mL/min), UV 254 nm, *t*<sub>1</sub> (minor) = 11.00 min, *t*<sub>2</sub> (major) = 13.50 min.

The relative configuration of the title compound was tentatively assigned by means of NMR NOESY experiments. Irradiation at 2.14 ppm (H<sub>7</sub>) gives signals at 1.43 ppm (H<sub>6</sub>) and 2.76 ppm (H<sub>5a</sub>) and at 2.92 ppm (H<sub>12b</sub>). Irradiation at 2.76 ppm (H<sub>5a</sub>) gives signals at 2.92 ppm (H<sub>12b</sub>). Therefore, a 5*a*,12*b*-*cis* configuration can be assumed.



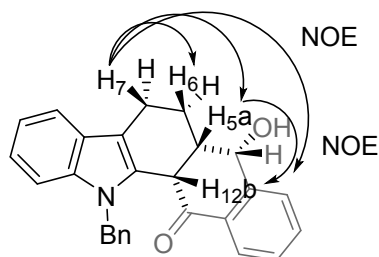

## 5. A detailed synthetic method example at a minimum 1 mmol scale

A representative example: 4 Å MS (30 mg) was added to a reaction tube and flame dried in situ. The tube was back-filled with argon and substrate 1a (1 equiv, 1 mmol), catalyst Mg[P4]<sub>2</sub> (360 mg, 5 mol%) and 2a (1.5 equiv, 1.25 mmol) were added. The resulting mixture was stirred at -25 °C for 10 min. Then anhydrous methylcyclohexane (100 mL) was added via a syringe. The mixture was then stirred overnight at the same temperature to give the crude product. The crude product was purified by washing with hexane and MeOH to give the product 3a. Then the product 3a was analyzed by HPLC. Yellow solid, 353mg, yield: 90%, The enantiomeric excess was determined to be 93% by HPLC analysis on Chiralpak AD column (20% isopropanol/hexane, 1 mL/min), UV 254 nm, t<sub>1</sub> (minor) = 12.4 min, t<sub>2</sub> (major) = 14.9 min. The ee value has a slight decrease from 96% to 93%.

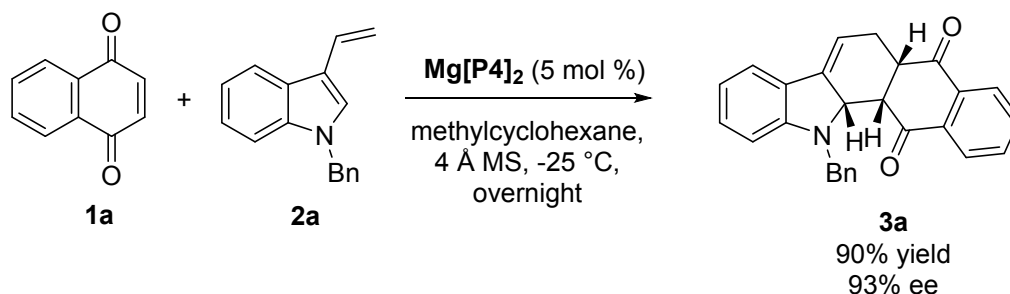

### (5a*S*,12a*S*,12b*S*)-12-benzyl-6,12,12a,12b-tetrahydro-5*H*-naphtho[2,3-*a*]carbazole-5,13(5a*H*)-dione (3a)

Yellow solid, 353mg, Yield: 90%, The enantiomeric excess was determined to be 93% by HPLC analysis on Chiralpak AD column (20% isopropanol/hexane, 1 mL/min), UV 254 nm, t<sub>1</sub> (minor) = 12.5 min, t<sub>2</sub> (major) = 14.9 min. The ee value has a slight decreased from 96% to 93%.

## 6. References

- (1) Klusmann, M.; Ratjen, L.; Hoffmann, S.; Wakchaure, V.; Goddard, R.; Benjamin List. Synthesis of TRIP and Analysis of Phosphate Salt Impurities. *Synlett* **2010**, *14*, 2189-2192.
- (2) Nguyen, T. N.; Nguyen, T. S.; May, J. A. Brønsted Acid Catalyzed Homoconjugate Addition of Organotrifluoroborates to Arylated Cyclopropyl Ketones. *Org. Lett.* **2016**, *18*, 3786-3789.
- (3) Cao, Y. J.; Cheng, H. G.; Lu, L. Q.; Zhang, J. J.; Cheng, Y.; Chen, J. R.; Xiao, W. J. Organocatalytic Multiple Cascade Reactions: A New Strategy for the Construction of Enantioenriched Tetrahydrocarbazoles. *Adv. Synth. Catal.* **2011**, *353*, 617-623.
- (4) Gioia, C.; Hauville, A.; Bernardi, L.; Fini, F.; Ricci, A. Organocatalytic Asymmetric Diels–Alder Reactions of 3-Vinylindoles. *Angew. Chem., Int. Ed.* **2008**, *47*, 9236-9239.
- (5) Terada, M.; Moriya, K.; Kanomata, K.; Sorimachi, K. Chiral Brønsted acid catalyzed stereoselective addition of azlactones to 3-vinylindoles for facile access to enantioenriched tryptophan derivatives. *Angew. Chem., Int. Ed.* **2011**, *50*, 12586-12590.
- (6) Peat, A. J.; Buchwald, S. L.; Novel Syntheses of Tetrahydropyrroloquinolines: Applications to Alkaloid Synthesis. *J. Am. Chem. Soc.* **1996**, *118*, 1028-1030.

## 7. Copies of NMR spectra and HPLC Chromatograms

### 1-benzyl-3-vinyl-1H-indole (2a)

Figure S1.  $^1\text{H}$  NMR (600MHz,  $\text{CDCl}_3$ ) spectrum of 2a

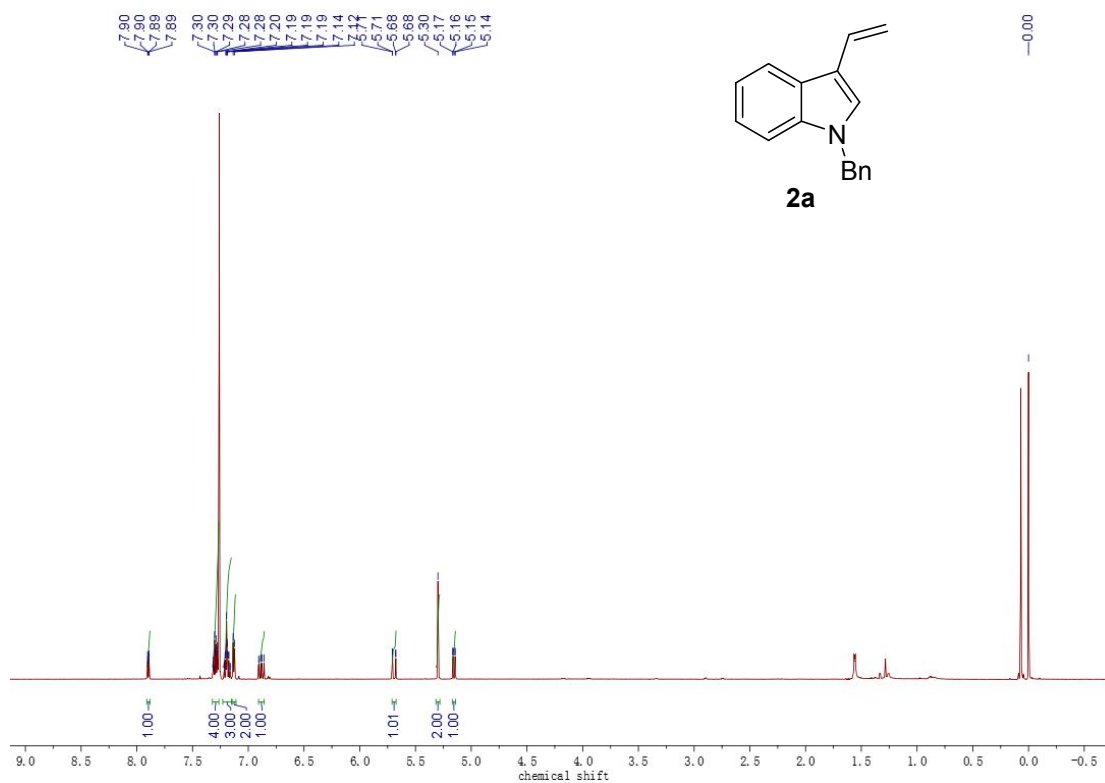

Figure S2.  $^{13}\text{C}$  NMR (151MHz,  $\text{CDCl}_3$ ) spectrum of 2a

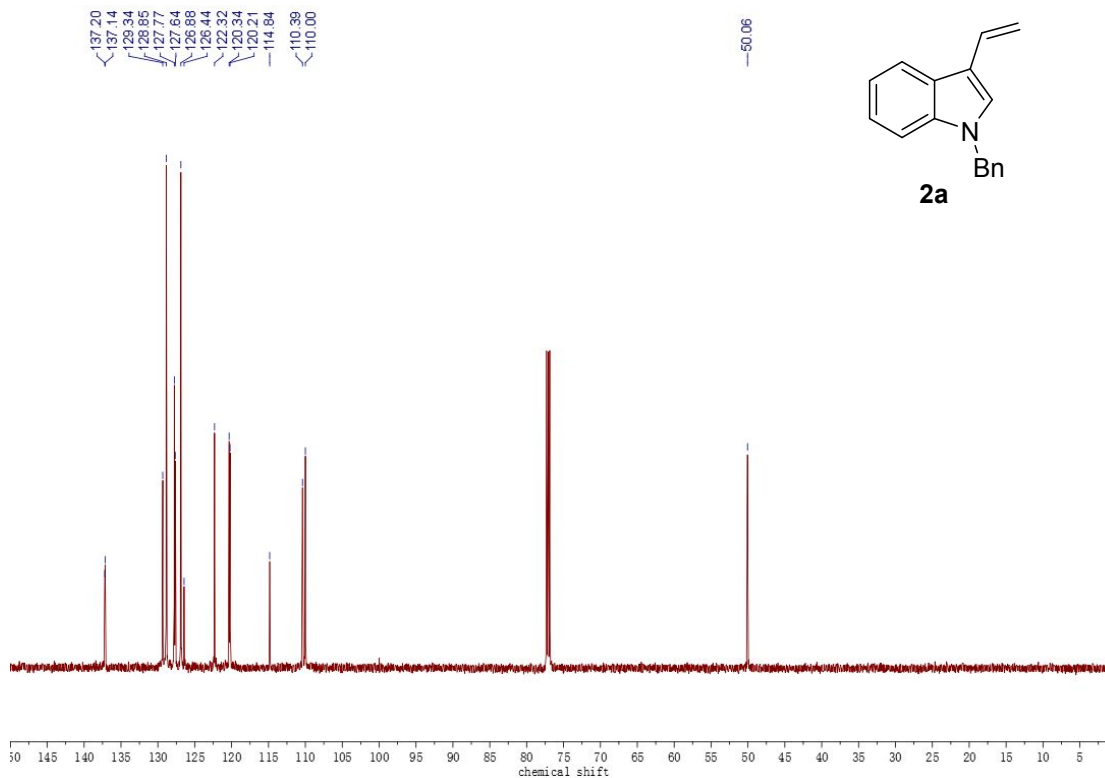

**1-benzyl-4-bromo-3-vinyl-1H-indole (2b)**

**Figure S3.  $^1\text{H}$  NMR (600MHz,  $\text{CDCl}_3$ ) spectrum of 2b**

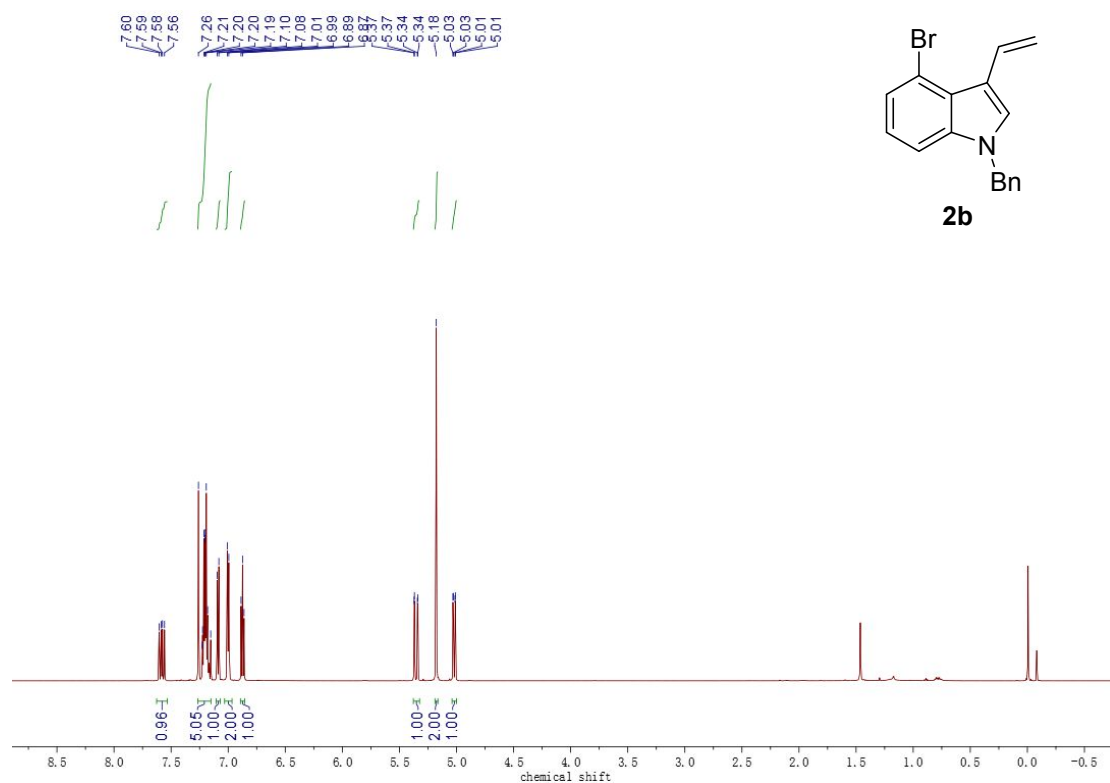

**Figure S4.  $^{13}\text{C}$  NMR (151MHz,  $\text{CDCl}_3$ ) spectrum of 2b**

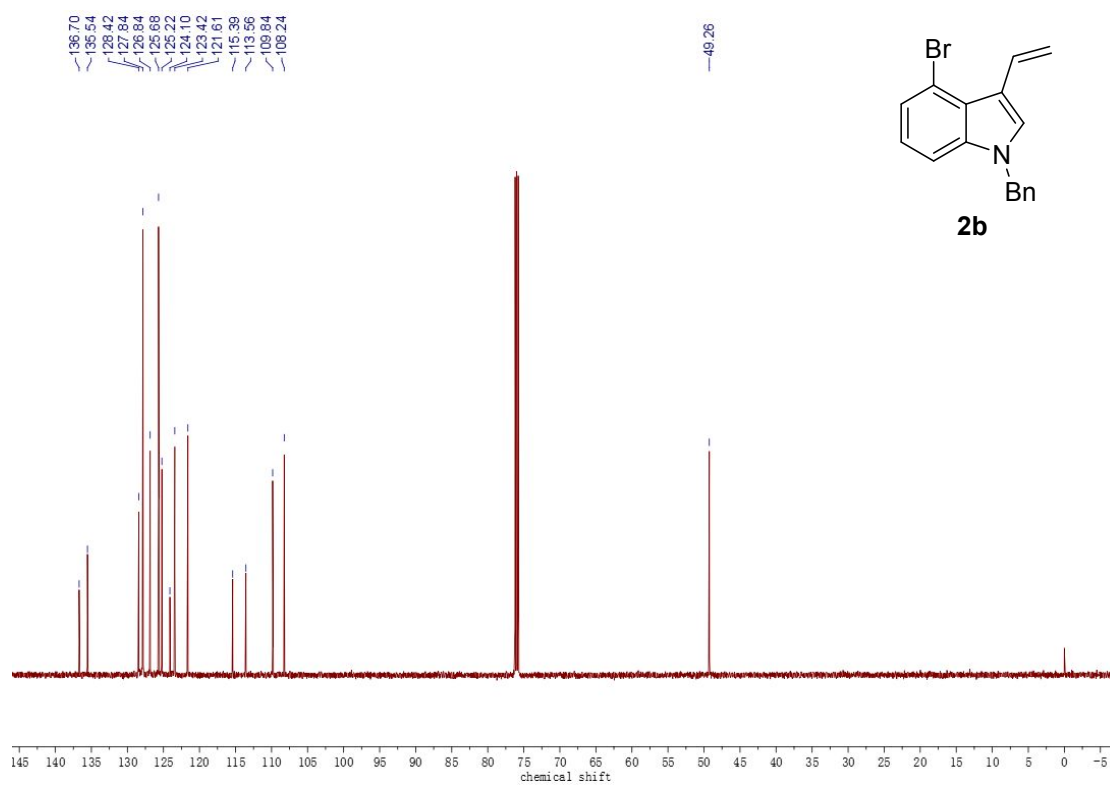

**1-benzyl-4-chloro-3-vinyl-1H-indole (2c)**

**Figure S5.  $^1\text{H}$  NMR (600MHz,  $\text{CDCl}_3$ ) spectrum of 2c**

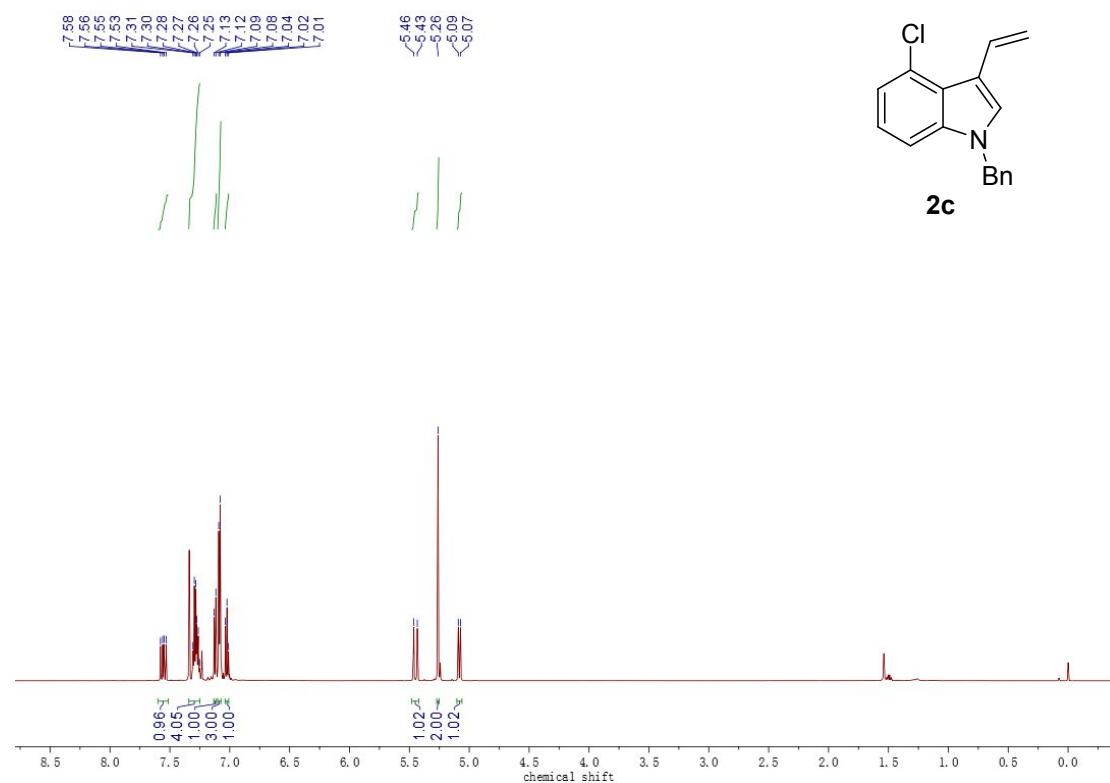

**Figure S6.  $^{13}\text{C}$  NMR (151MHz,  $\text{CDCl}_3$ ) spectrum of 2c**

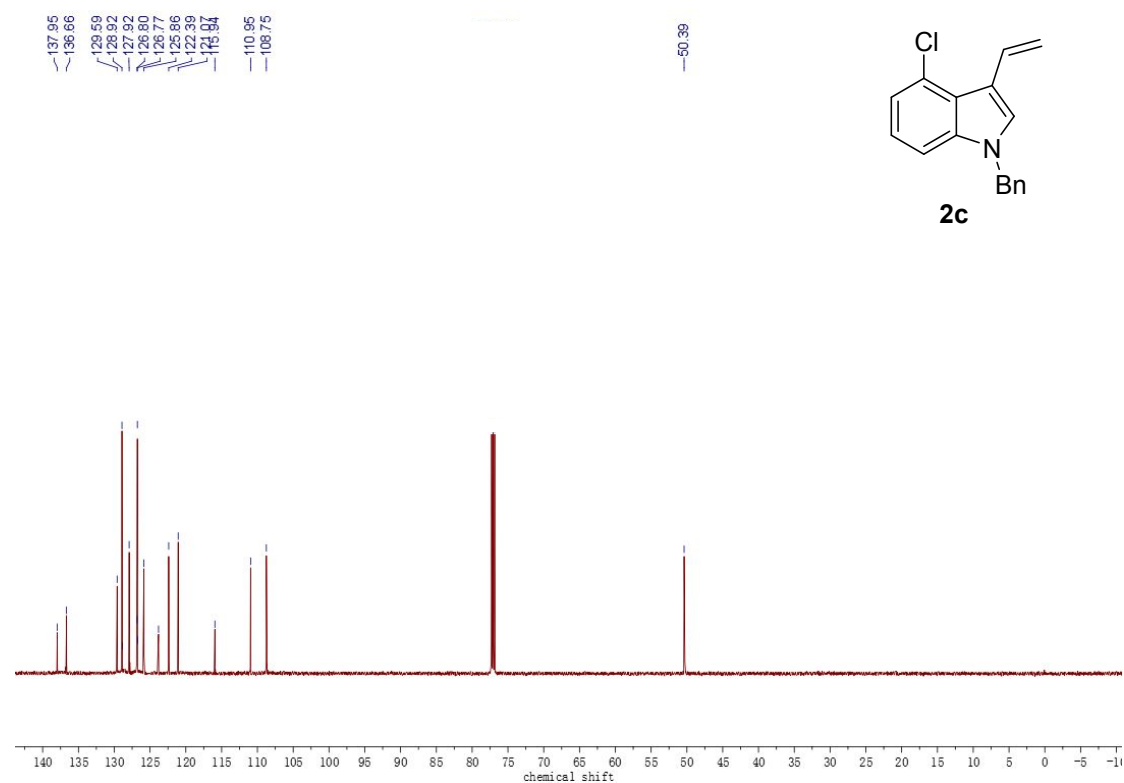

**1-benzyl-5-bromo-3-vinyl-1H-indole (2d)**

**Figure S7.  $^1\text{H}$  NMR (400MHz,  $\text{CDCl}_3$ ) spectrum of 2d**

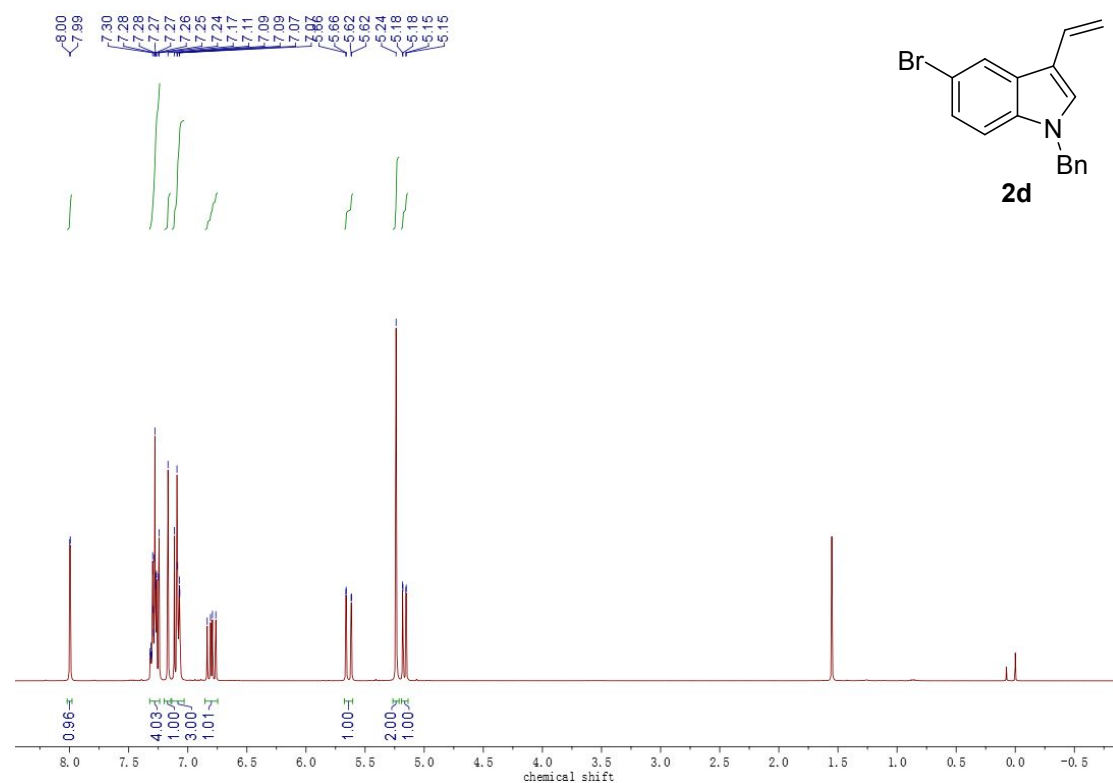

**Figure S8.  $^{13}\text{C}$  NMR (101MHz,  $\text{CDCl}_3$ ) spectrum of 2d**

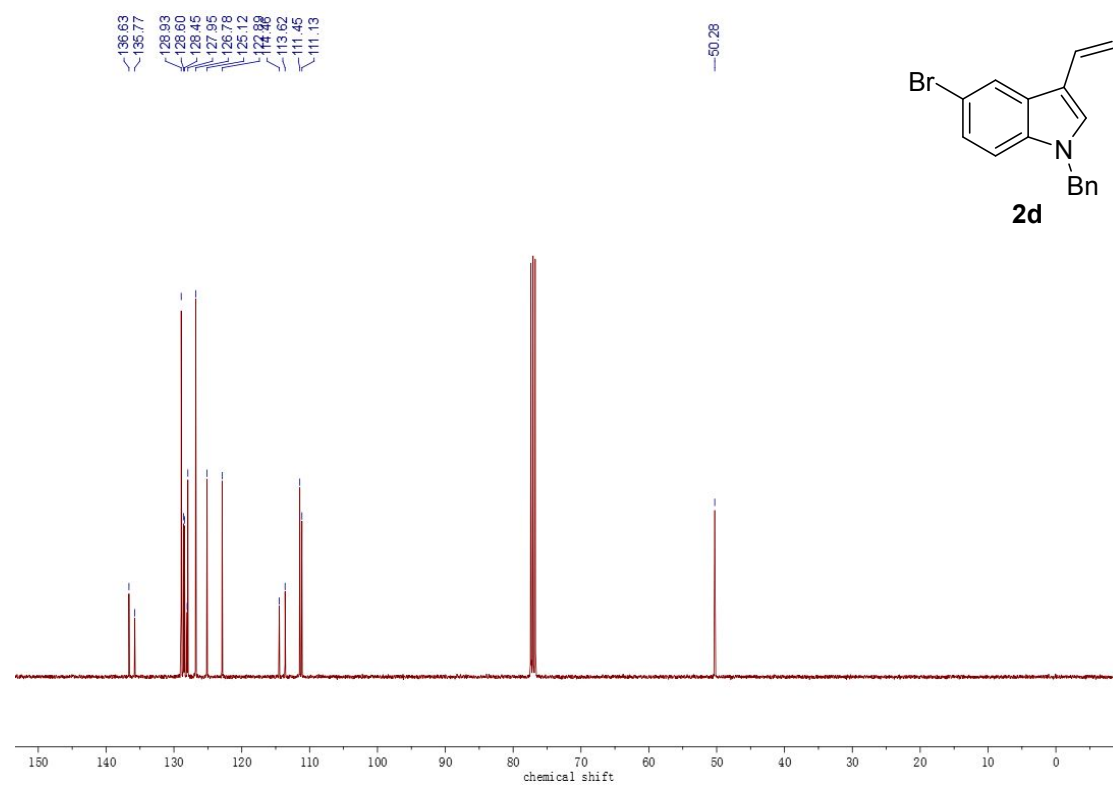

**1-benzyl-5-chloro-3-vinyl-1H-indole (2e)**

**Figure S9.  $^1\text{H}$  NMR (600MHz,  $\text{CDCl}_3$ ) spectrum of 2e**

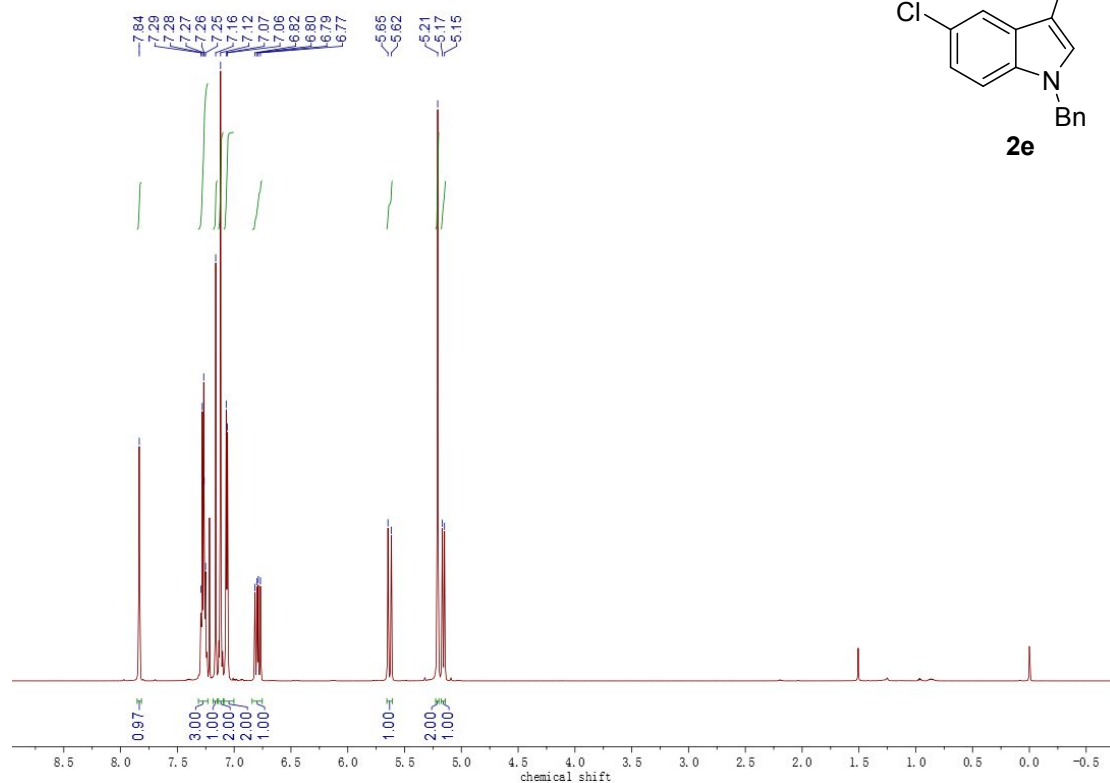

**Figure S10.  $^{13}\text{C}$  NMR (151MHz,  $\text{CDCl}_3$ ) spectrum of 2e**

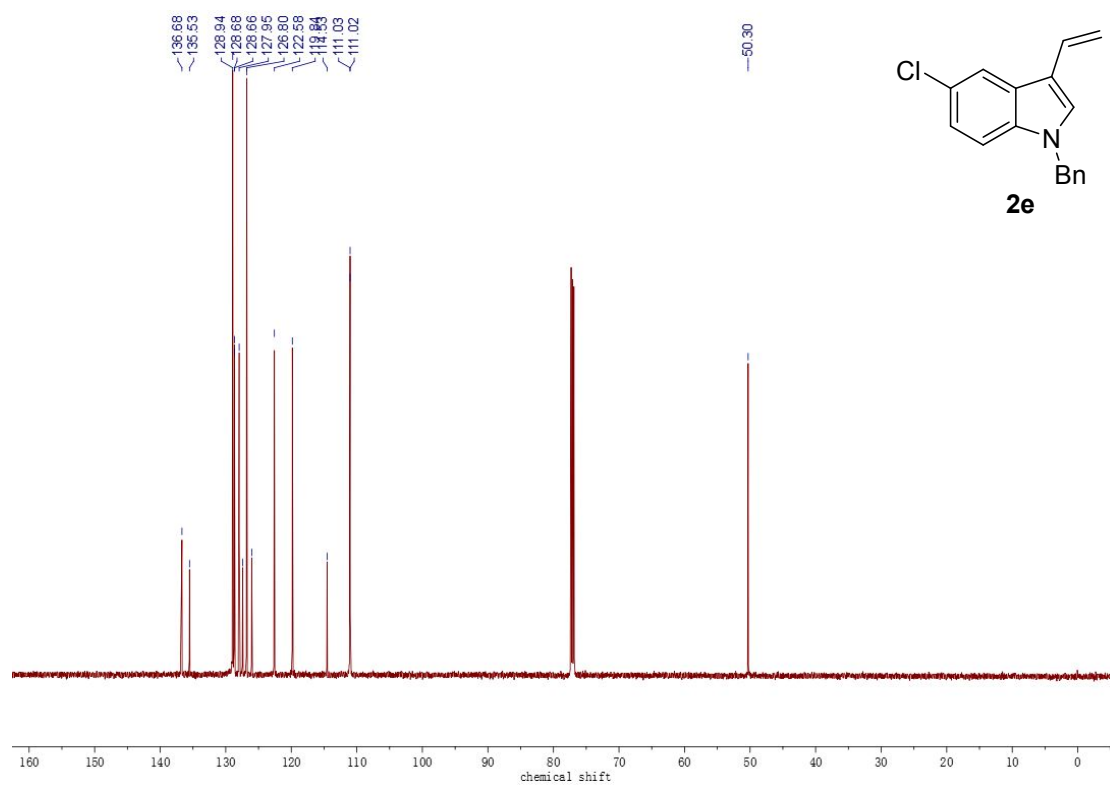

**1-benzyl-6-bromo-3-vinyl-1H-indole (2f)**

**Figure S11.  $^1\text{H}$  NMR (600MHz,  $\text{CDCl}_3$ ) spectrum of 2f**

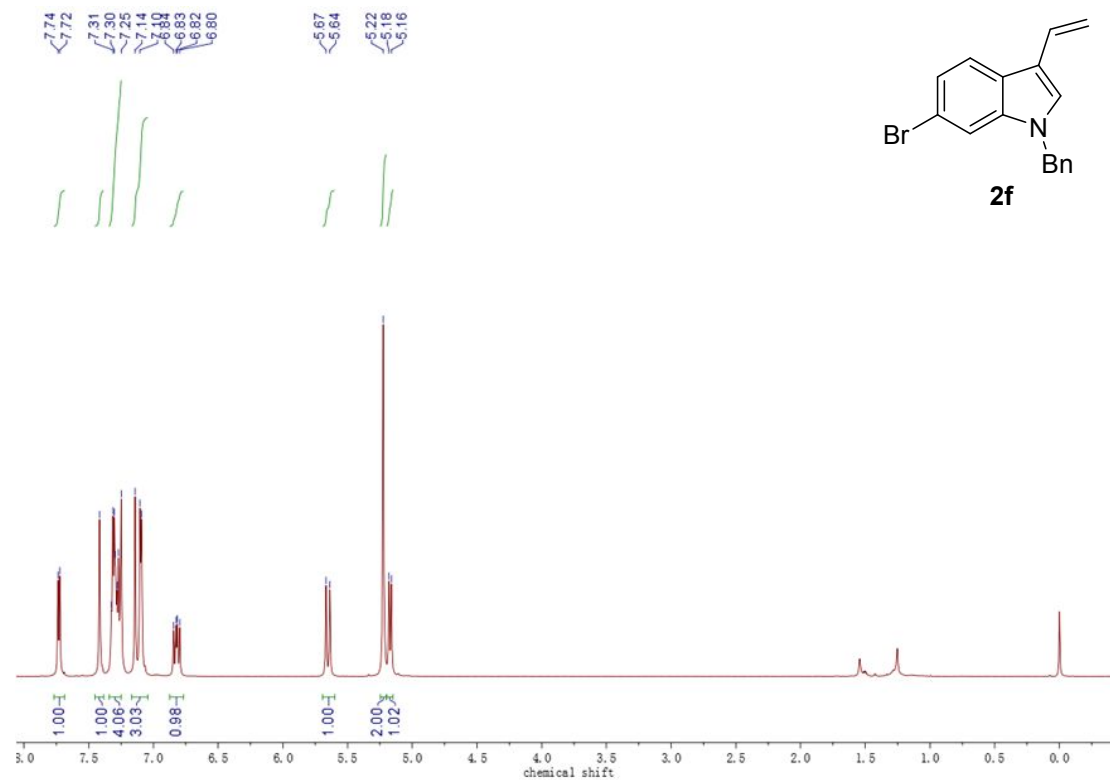

**Figure S12.  $^{13}\text{C}$  NMR (151MHz,  $\text{CDCl}_3$ ) spectrum of 2f**

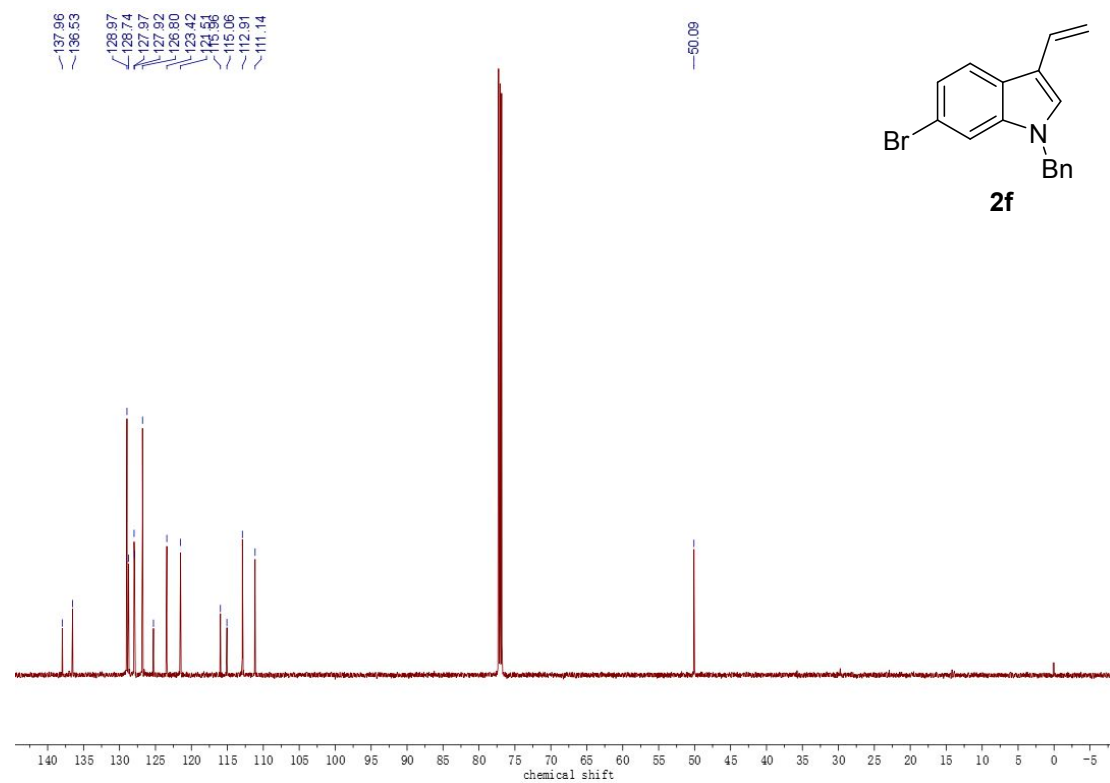



**1-benzyl-6-fluoro-3-vinyl-1H-indole (2g)**

**Figure S13.  $^1\text{H}$  NMR (600MHz,  $\text{CDCl}_3$ ) spectrum of 2g**

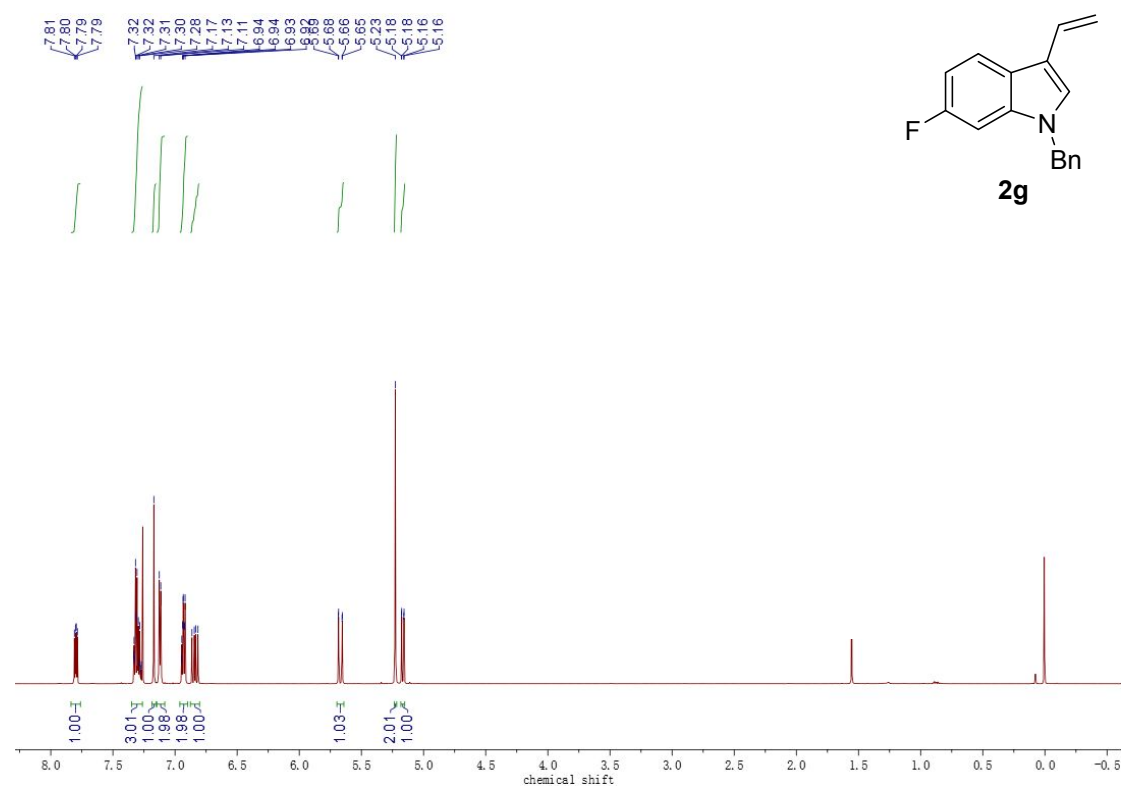

**Figure S14.  $^{13}\text{C}$  NMR (151MHz,  $\text{CDCl}_3$ ) spectrum of 2g**

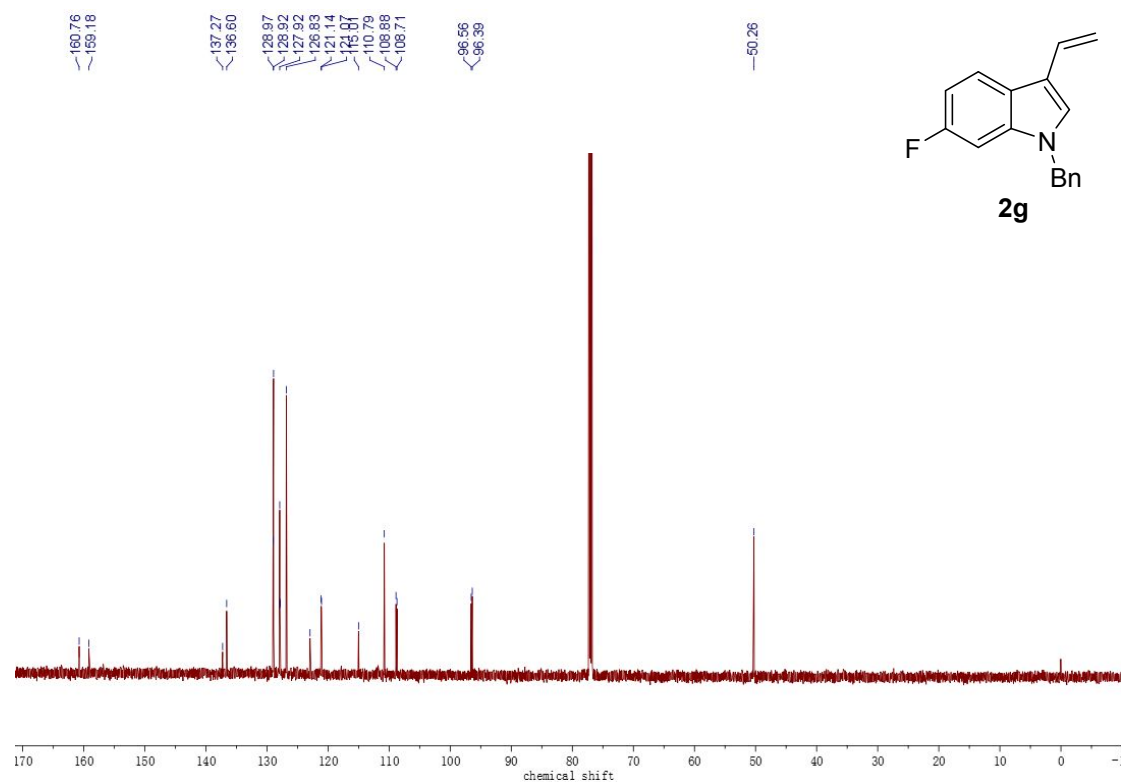

**1-benzyl-5-methyl-3-vinyl-1H-indole (2h)**

**Figure S15.  $^1\text{H}$  NMR (600MHz,  $\text{CDCl}_3$ ) spectrum of 2h**

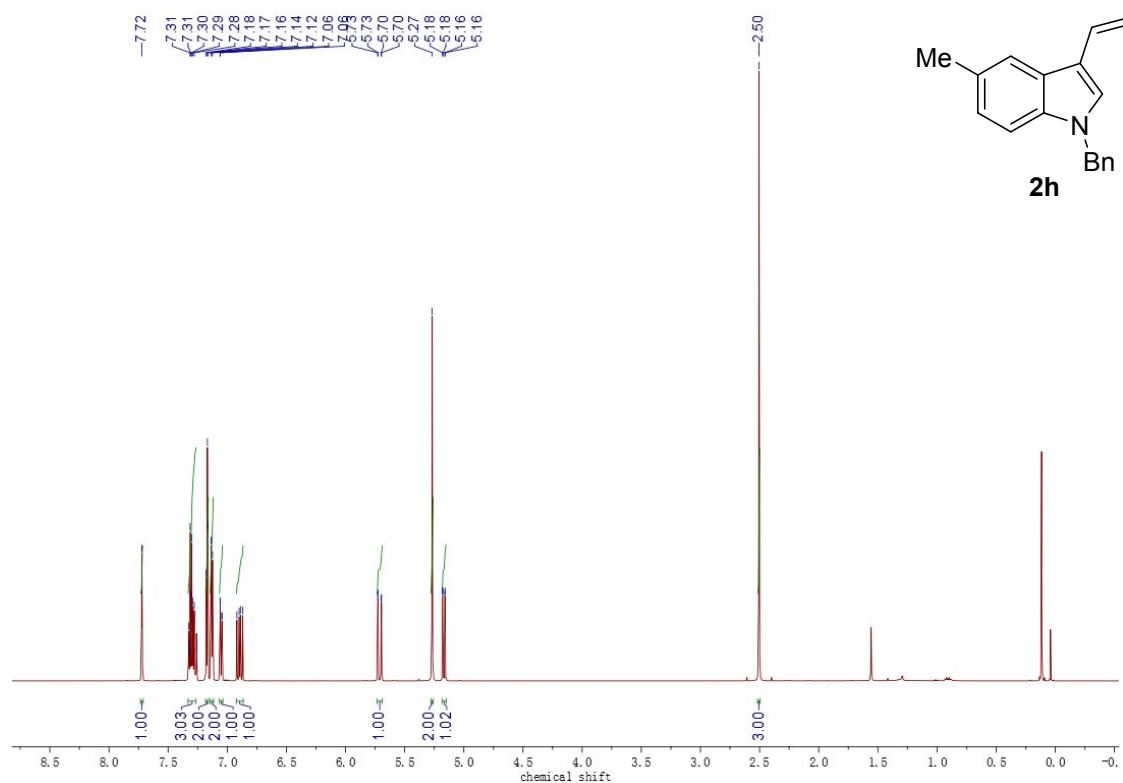

**Figure S16.  $^{13}\text{C}$  NMR (151MHz,  $\text{CDCl}_3$ ) spectrum of 2h**

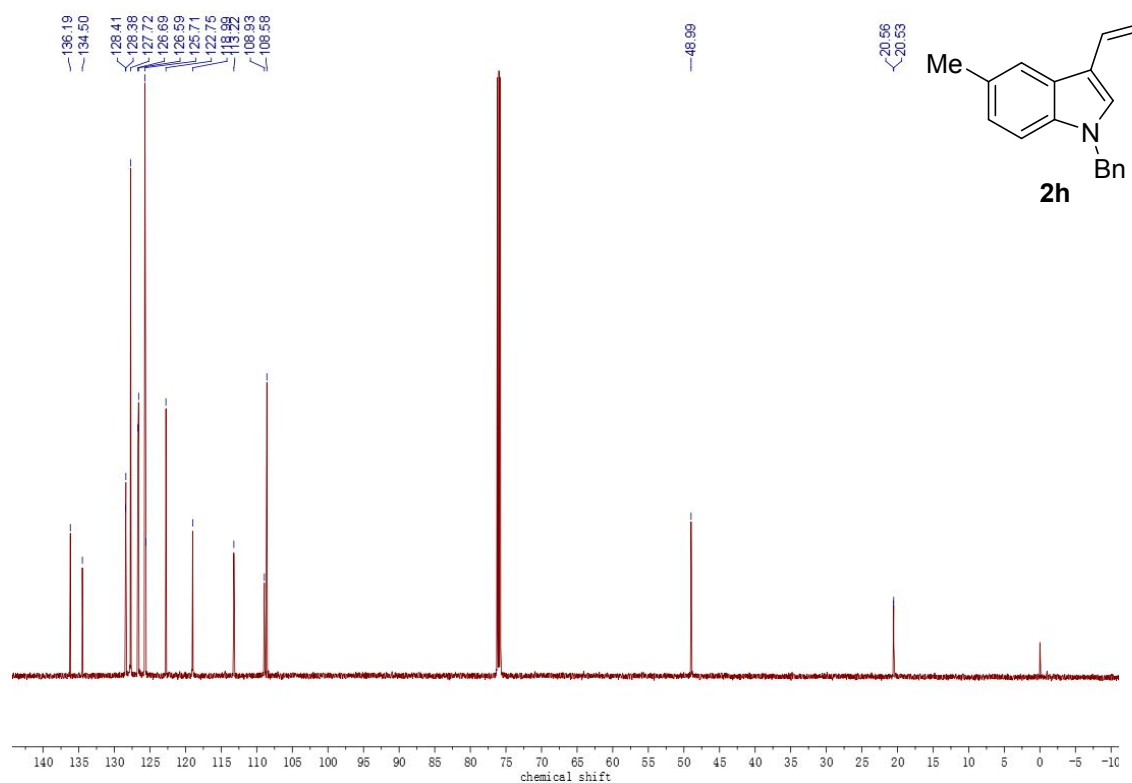

**1-benzyl-5-methoxy-3-vinyl-1H-indole (2i)**

**Figure S17.  $^1\text{H}$  NMR (600MHz,  $\text{CDCl}_3$ ) spectrum of 2i**

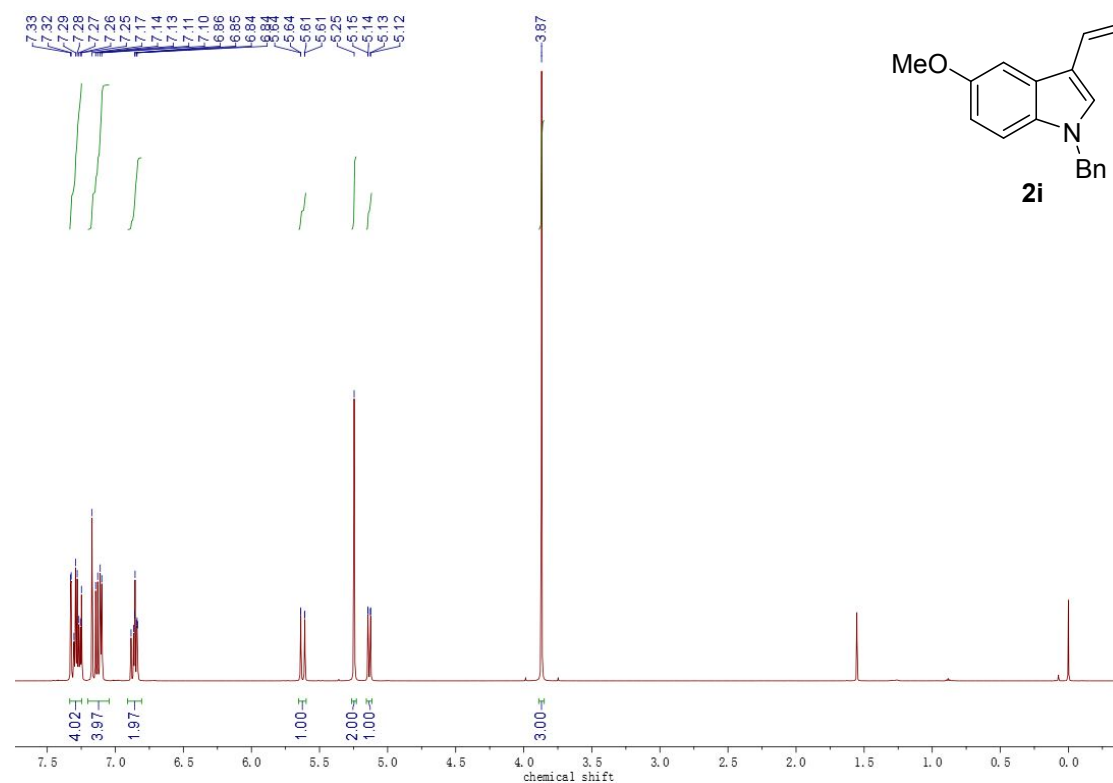

**Figure S18.  $^{13}\text{C}$  NMR (151MHz,  $\text{CDCl}_3$ ) spectrum of 2i**

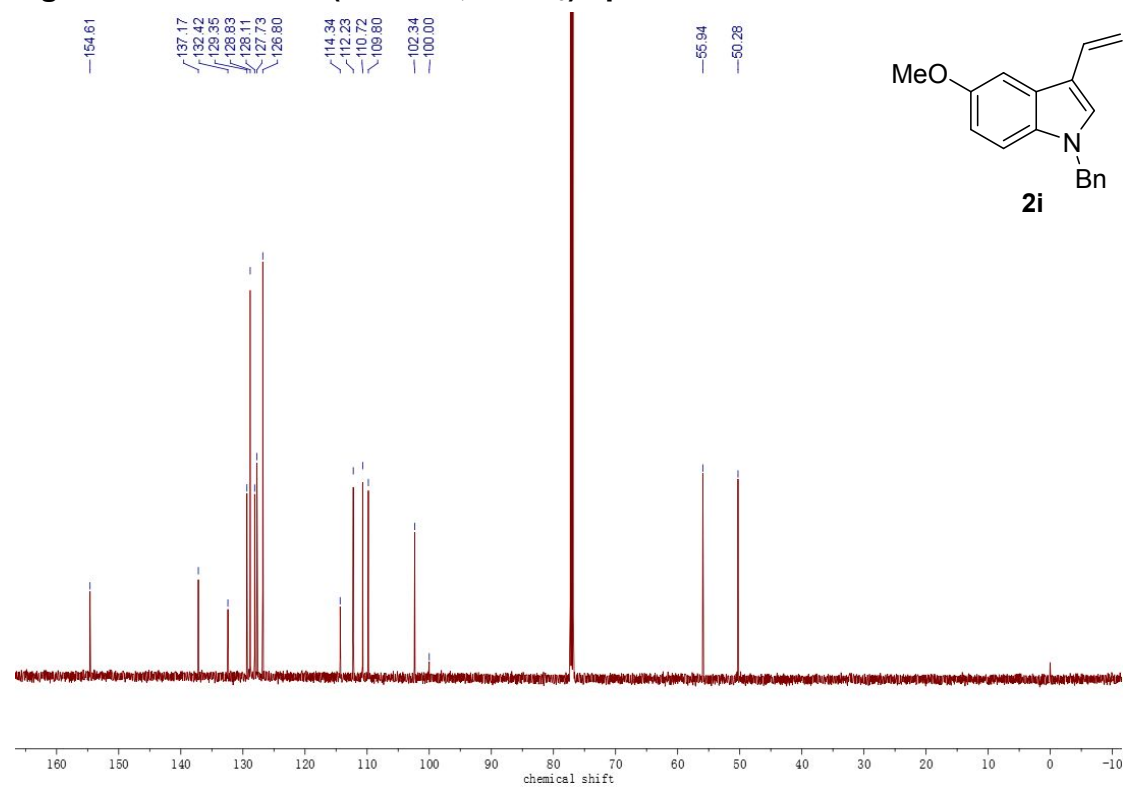

**1-benzyl-6-methoxy-3-vinyl-1H-indole (2j)**

**Figure S19.  $^1\text{H}$  NMR (600MHz,  $\text{CDCl}_3$ ) spectrum of 2j**

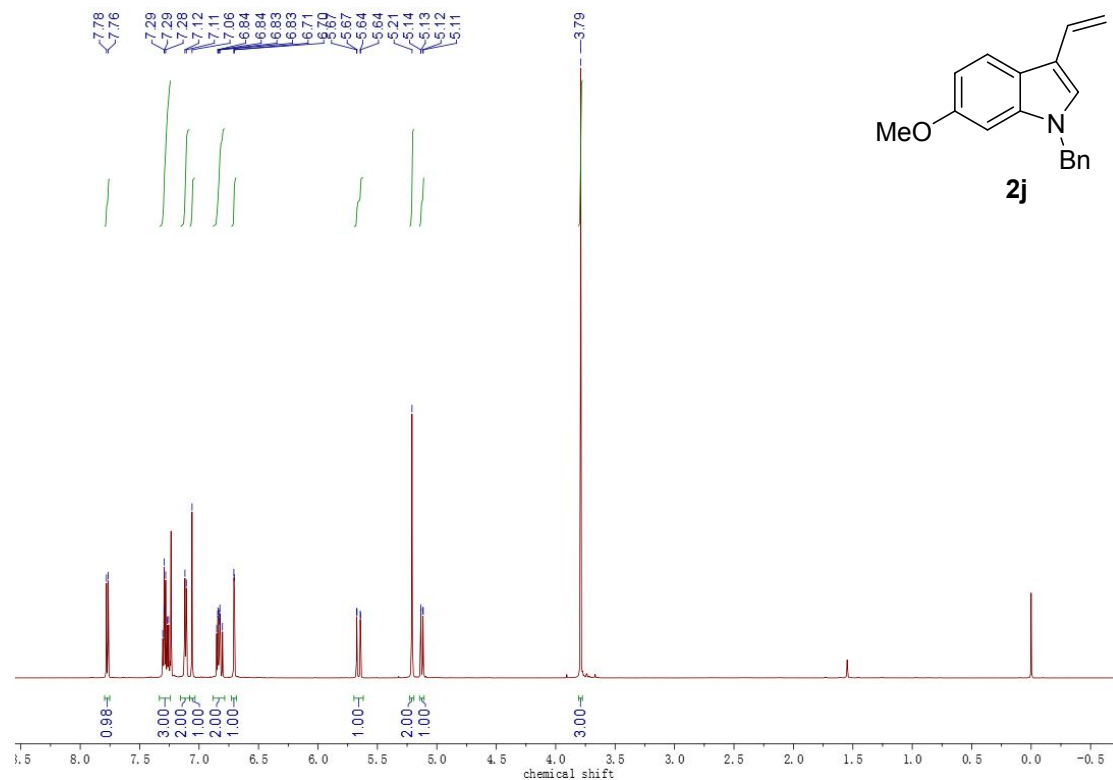

**Figure S20.  $^{13}\text{C}$  NMR (151MHz,  $\text{CDCl}_3$ ) spectrum of 2j**

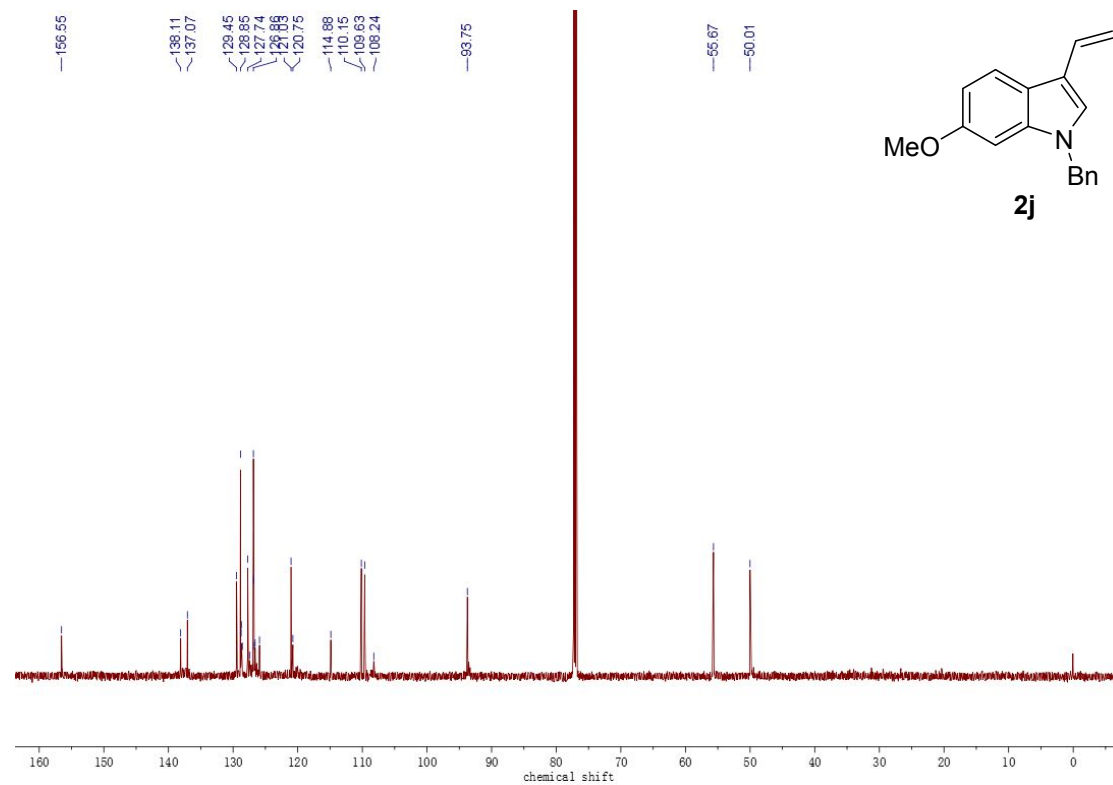

**1-benzyl-7-methyl-3-vinyl-1H-indole (2k)**

**Figure S21.  $^1\text{H}$  NMR (600MHz,  $\text{CDCl}_3$ ) spectrum of 2k**

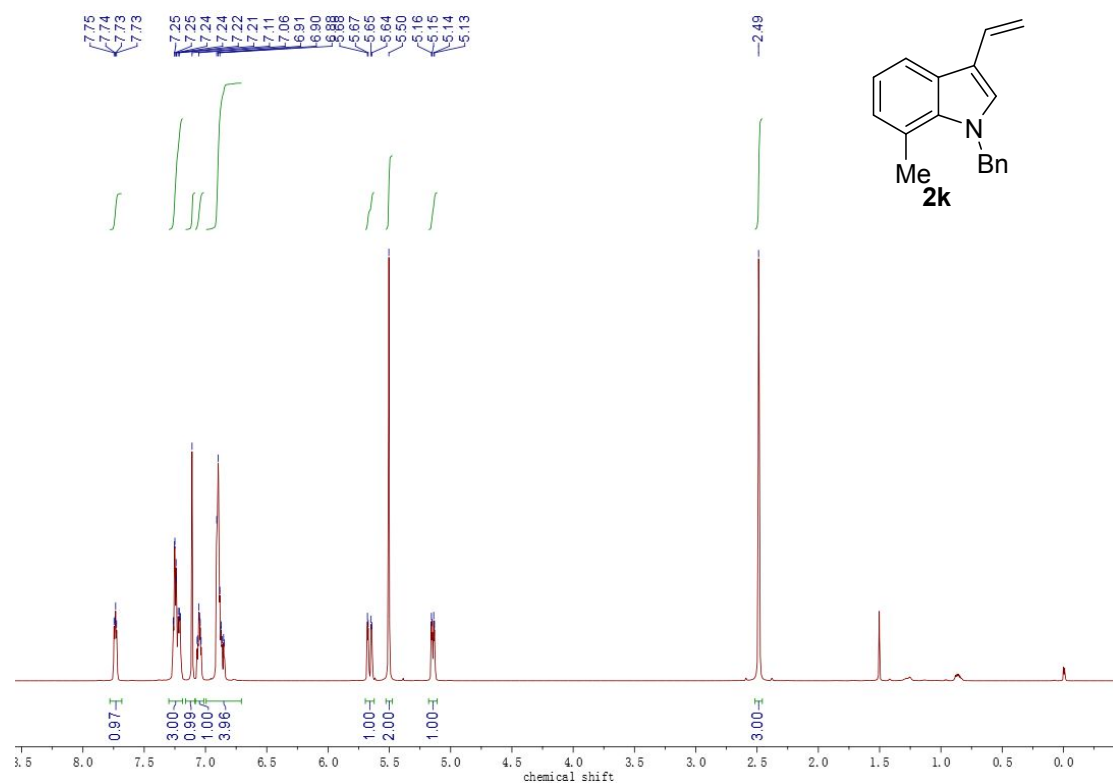

**Figure S22.  $^{13}\text{C}$  NMR (151MHz,  $\text{CDCl}_3$ ) spectrum of 2k**

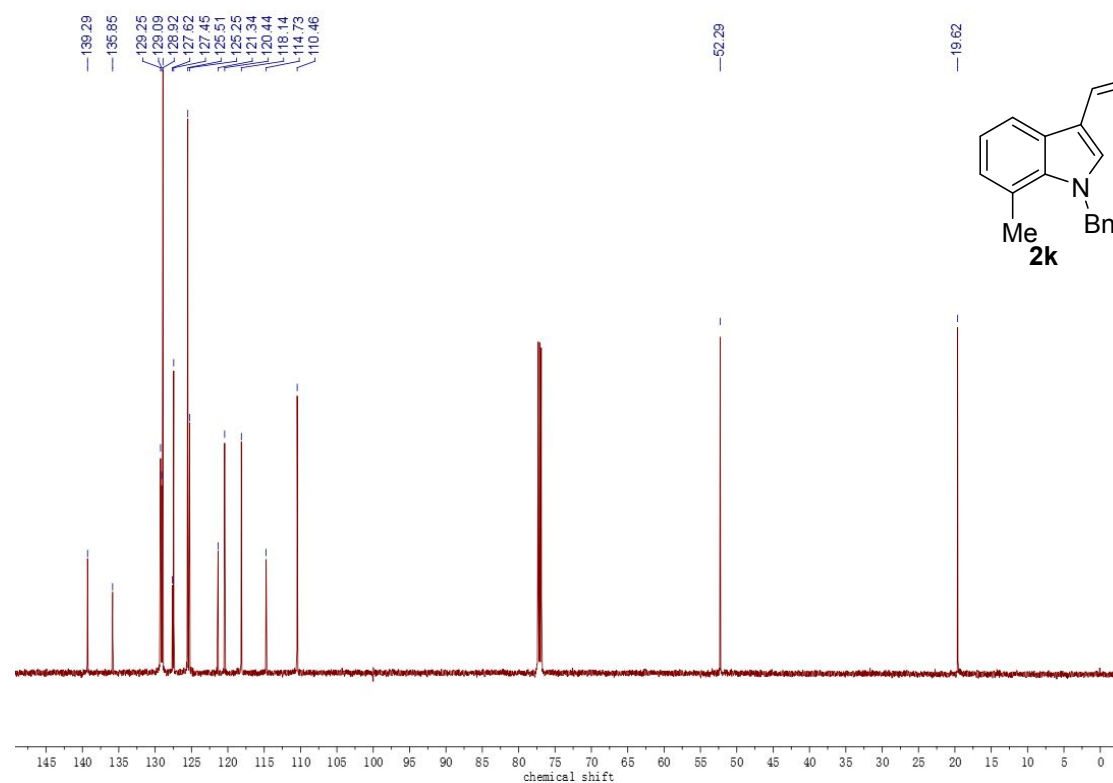

**1-benzyl-3-(prop-1-en-2-yl)-1H-indole (2I)**

**Figure S23.  $^1\text{H}$  NMR (600MHz,  $\text{CDCl}_3$ ) spectrum of 2I**

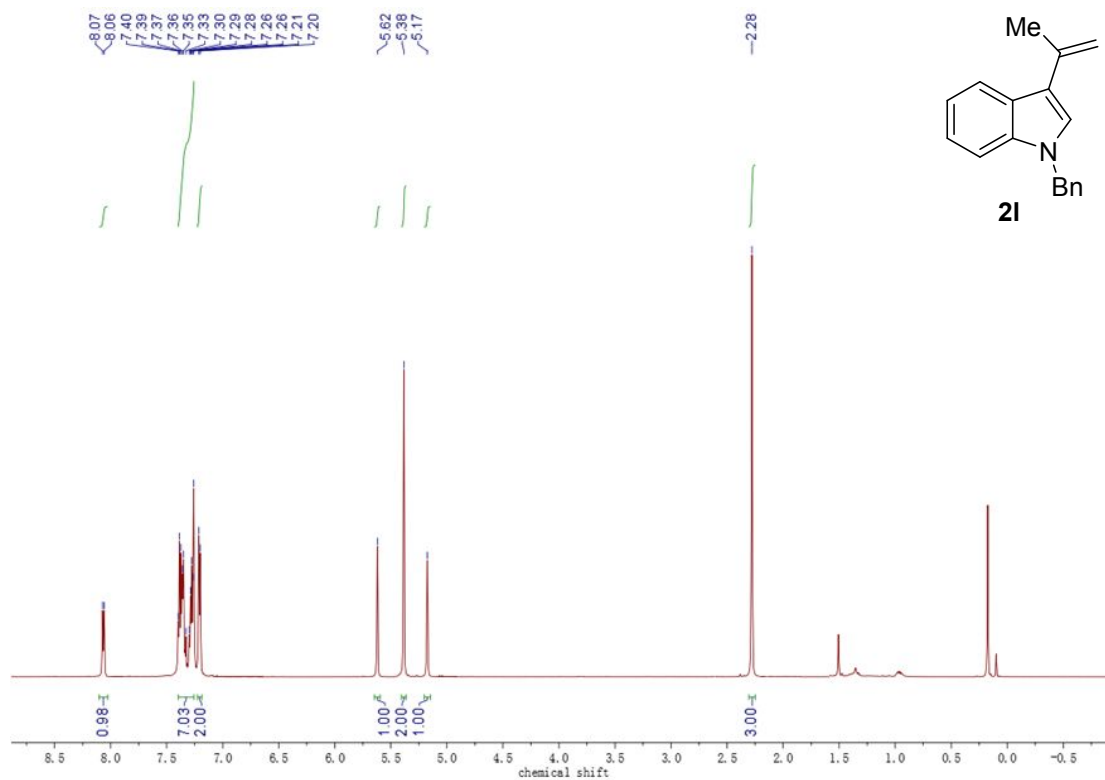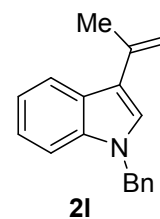

**Figure S24.  $^{13}\text{C}$  NMR (151MHz,  $\text{CDCl}_3$ ) spectrum of 2I**

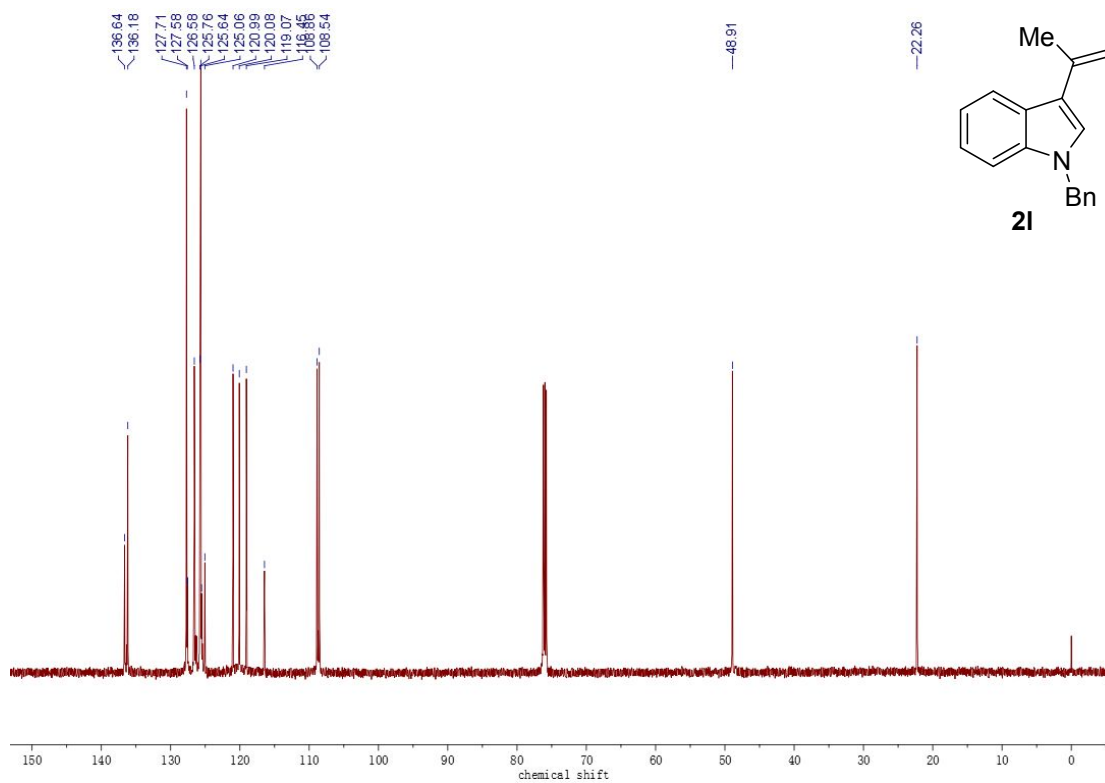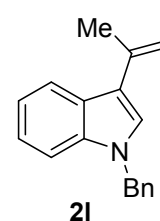

**(E/Z)-1-benzyl-3-(prop-1-en-1-yl)-1H-indole (2m)**

**Figure S25.  $^1\text{H}$  NMR (600MHz,  $\text{CDCl}_3$ ) spectrum of 2m**

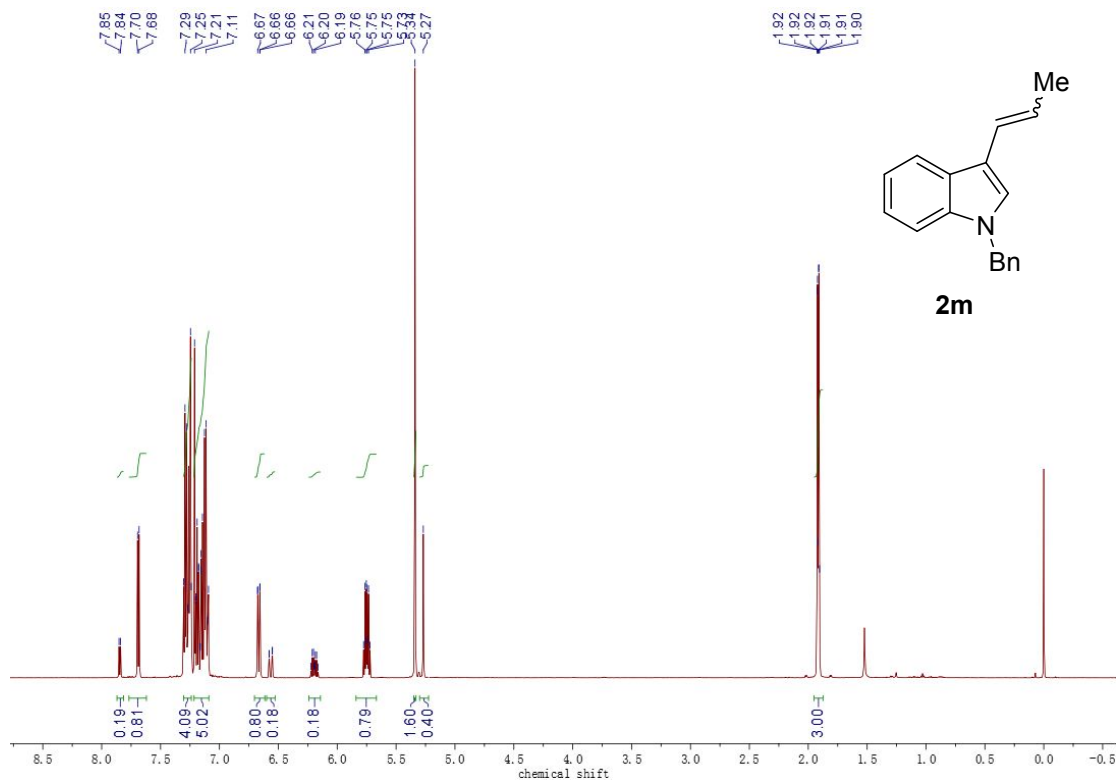

**Figure S26.  $^{13}\text{C}$  NMR (151MHz,  $\text{CDCl}_3$ ) spectrum of 2m**

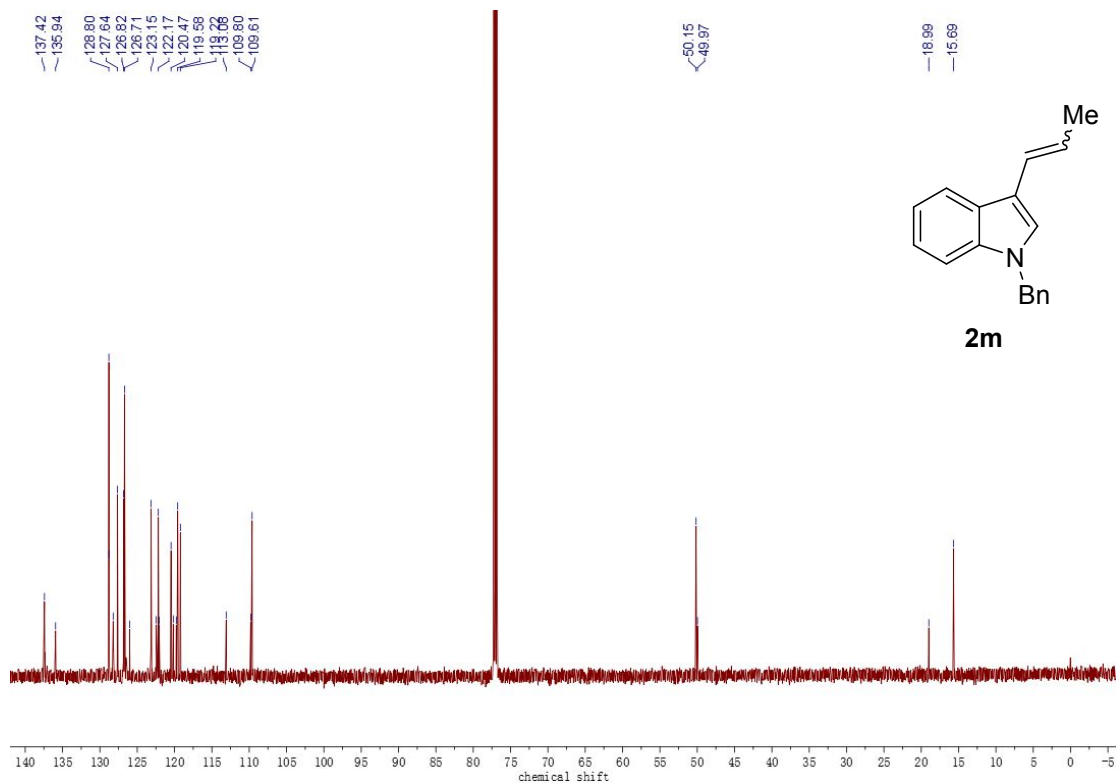

### 3-vinyl-1H-indole (2n)

Figure S27.  $^1\text{H}$  NMR (400MHz,  $\text{CDCl}_3$ ) spectrum of 2n

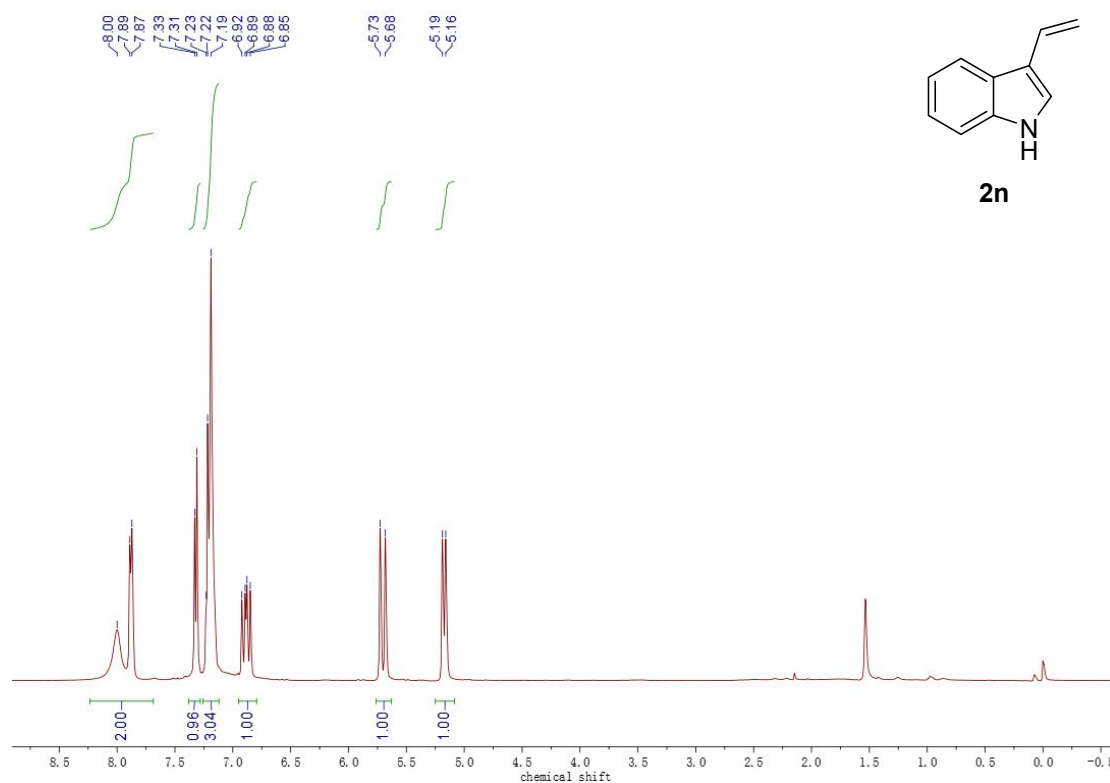

Figure S28.  $^{13}\text{C}$  NMR (101MHz,  $\text{CDCl}_3$ ) spectrum of 2n

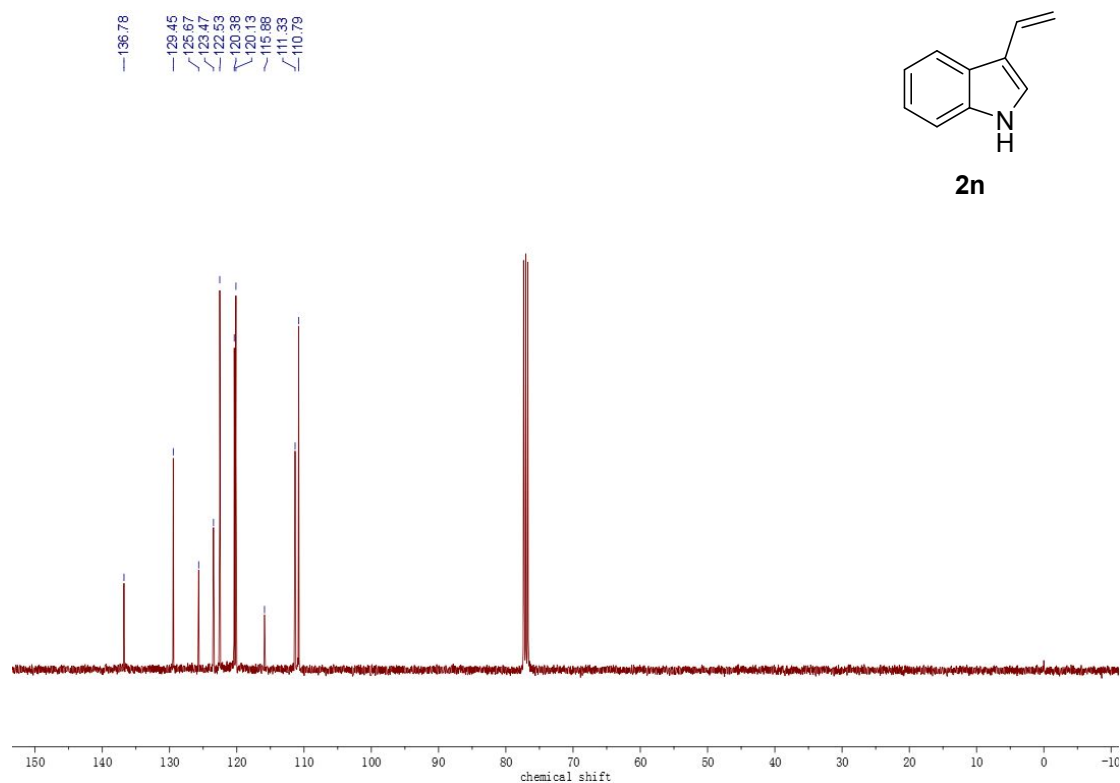



**1-(4-methoxyphenyl)-3-vinyl-1H-indole (2o)**

**Figure S29.  $^1\text{H}$  NMR (600MHz,  $\text{CDCl}_3$ ) spectrum of 2o**

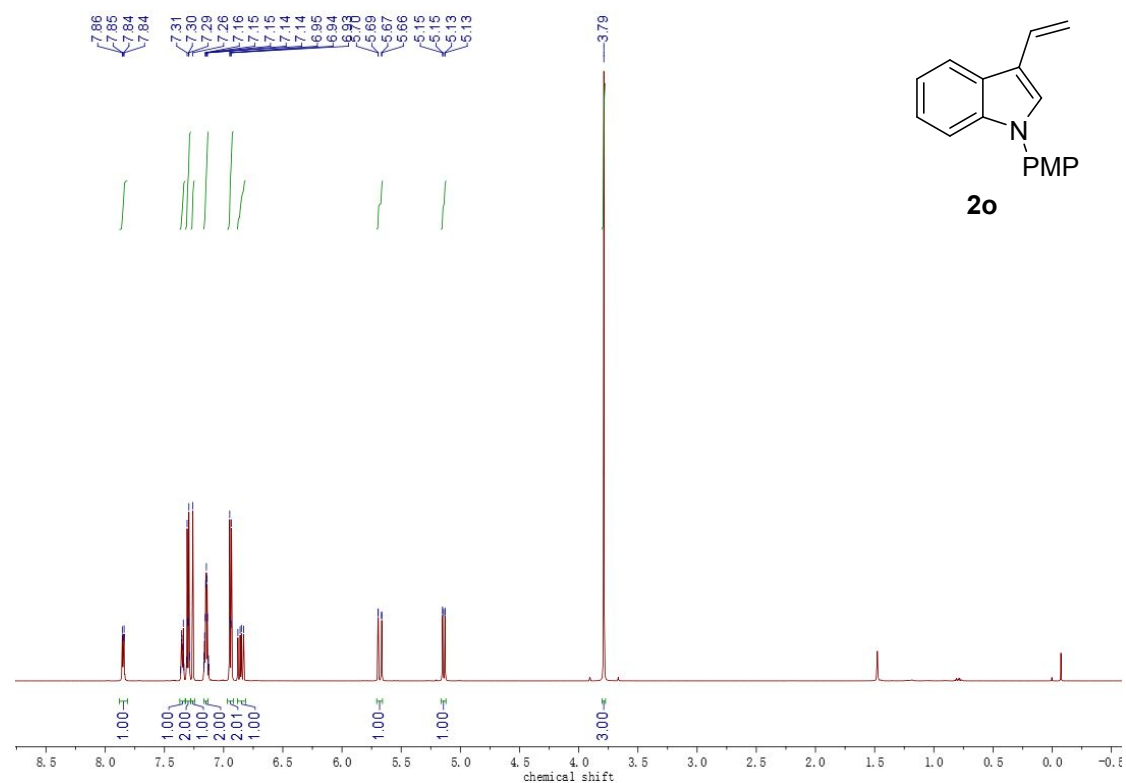

**Figure S30.  $^{13}\text{C}$  NMR (151MHz,  $\text{CDCl}_3$ ) spectrum of 2o**

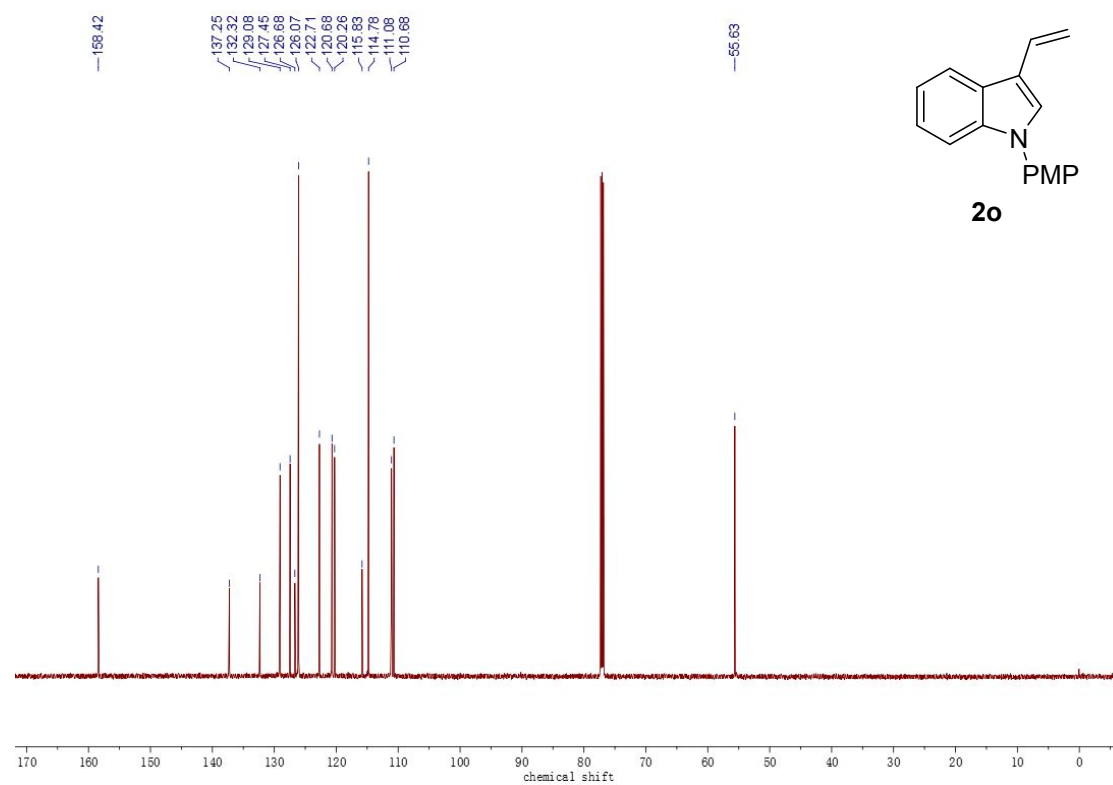

**1-(4-methoxybenzyl)-3-vinyl-1H-indole (2p)**

**Figure S31.  $^1\text{H}$  NMR (600MHz,  $\text{CDCl}_3$ ) spectrum of 2p**

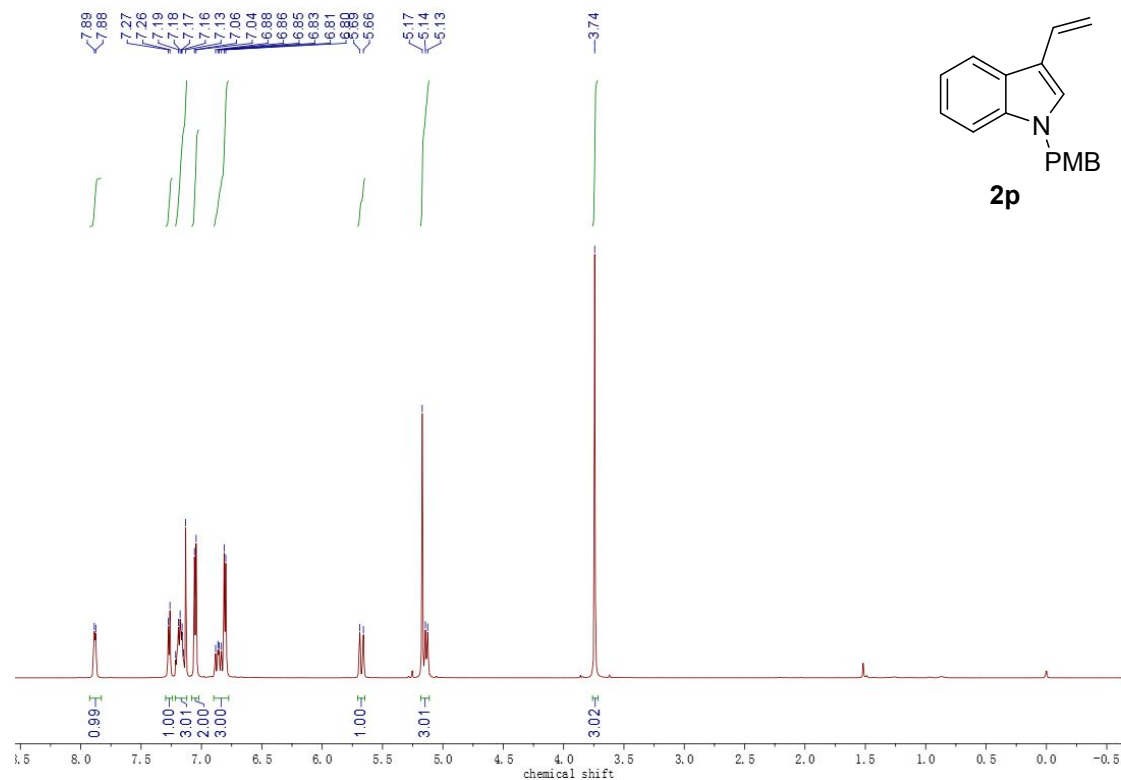

**Figure S32.  $^{13}\text{C}$  NMR (151MHz,  $\text{CDCl}_3$ ) spectrum of 2p**

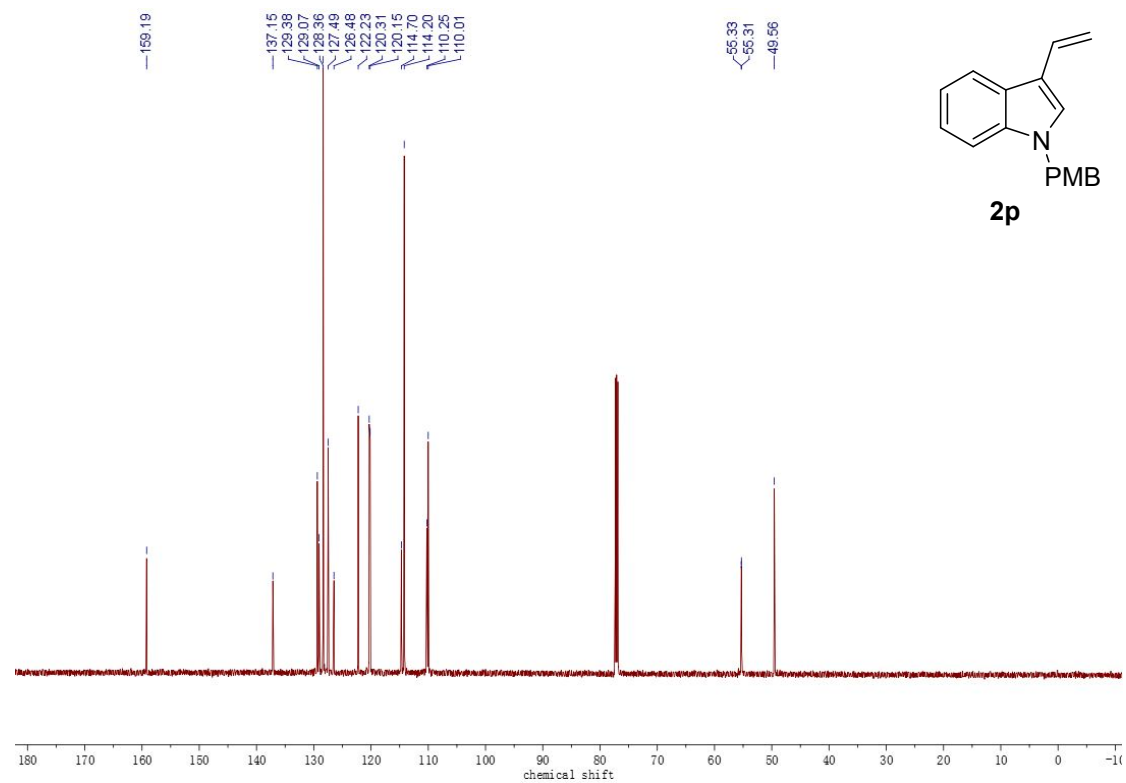

**1-(4-(tert-butyl)benzyl)-3-vinyl-1H-indole (2q)**

**Figure S33.  $^1\text{H}$  NMR (600MHz,  $\text{CDCl}_3$ ) spectrum of 2q**

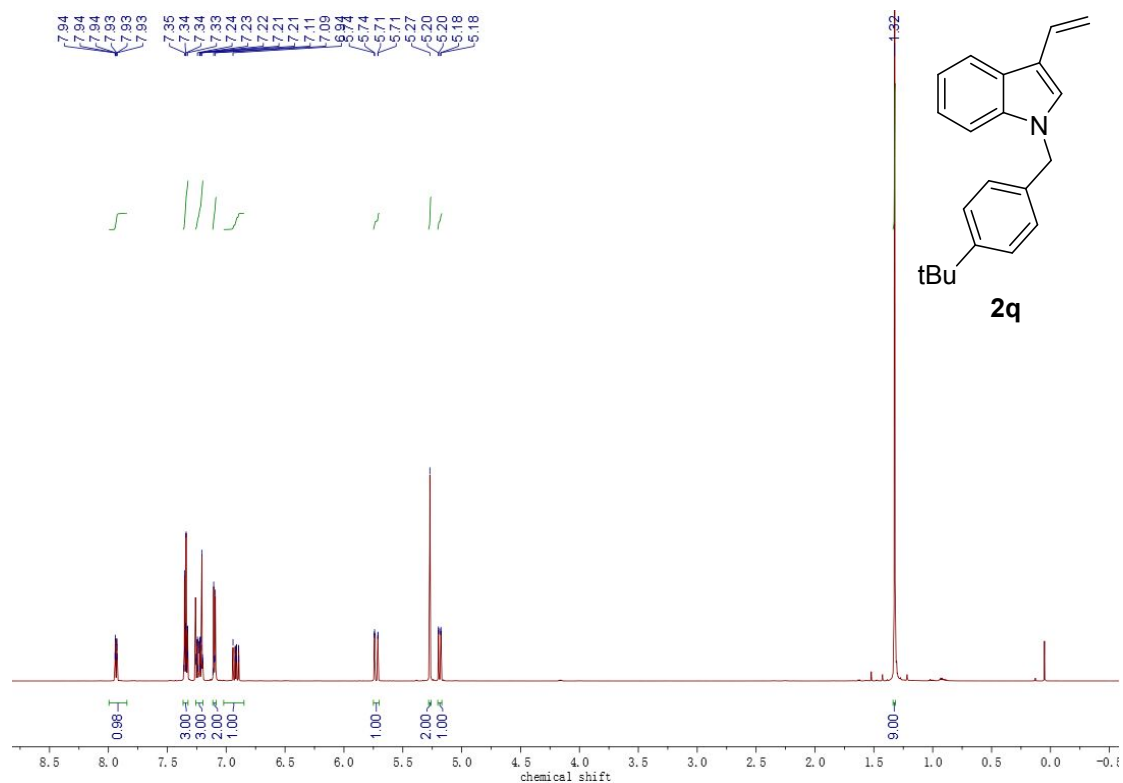

**Figure S34.  $^{13}\text{C}$  NMR (151MHz,  $\text{CDCl}_3$ ) spectrum of 2q**

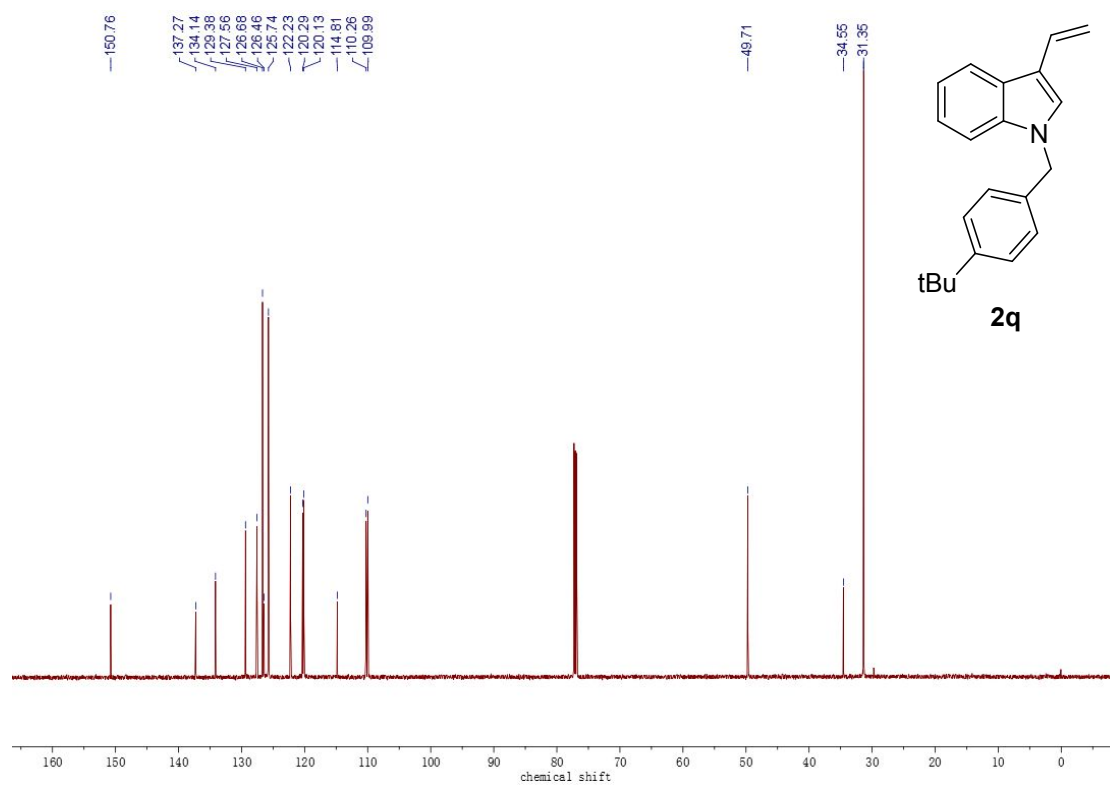

**1-(4-chlorobenzyl)-3-vinyl-1H-indole (2r)**

**Figure S35.  $^1\text{H}$  NMR (600MHz,  $\text{CDCl}_3$ ) spectrum of 2r**

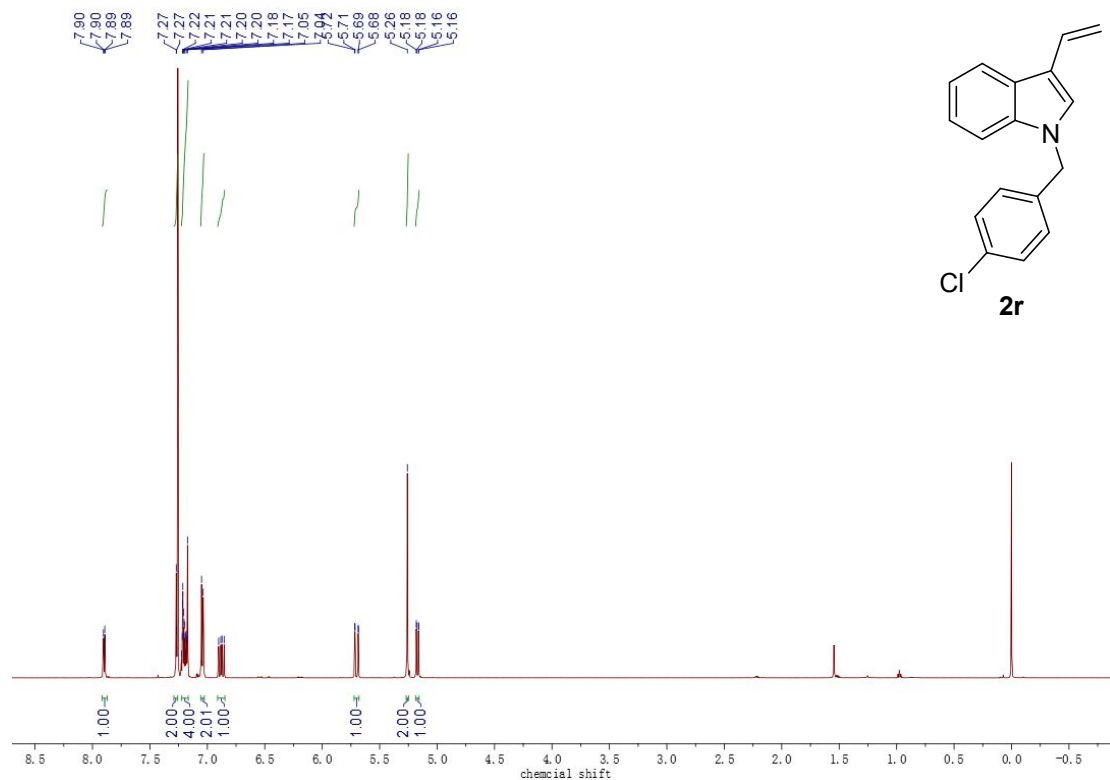

**Figure S36.  $^{13}\text{C}$  NMR (151MHz,  $\text{CDCl}_3$ ) spectrum of 2r**

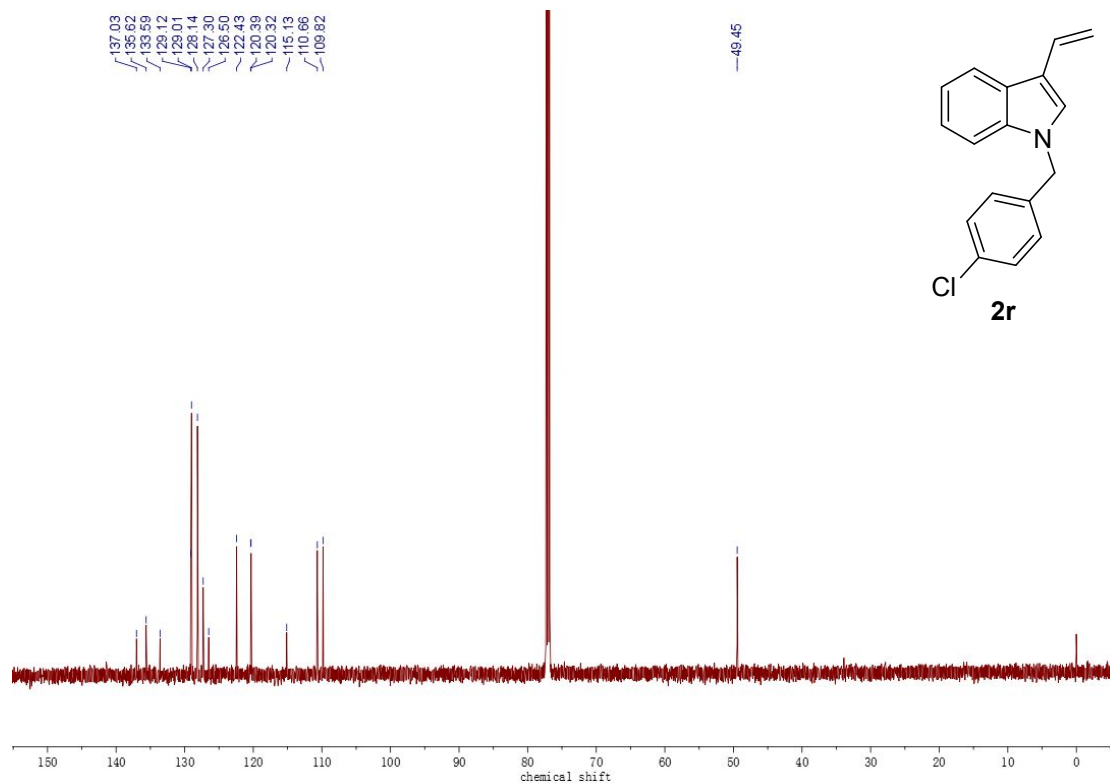

**(5a*S*,12a*S*,12b*S*)-12-benzyl-6,12,12a,12b-tetrahydro-5*H*-naphtho[2,3-*a*]carbazole-5,13(5a*H*)-dione (3a)**

**Figure S37.  $^1\text{H}$  NMR (600MHz,  $\text{CDCl}_3$ ) spectrum of 3a**

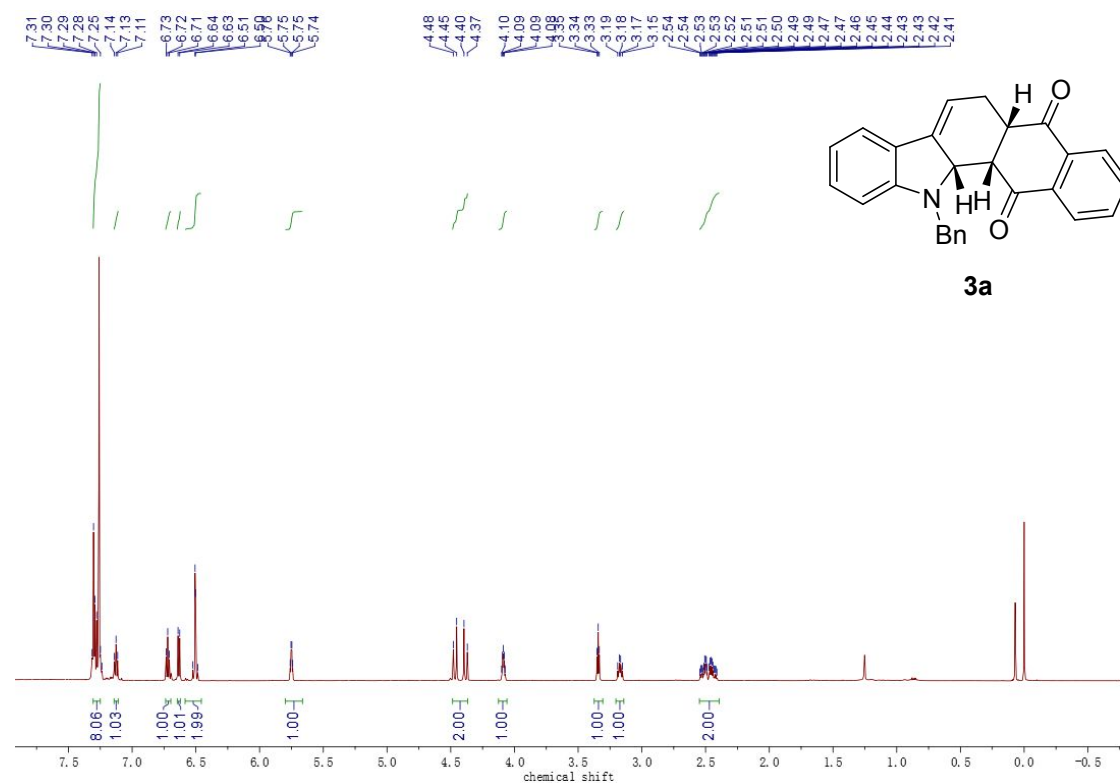

**Figure S38.  $^{13}\text{C}$  NMR (151MHz,  $\text{CDCl}_3$ ) spectrum of 3a**

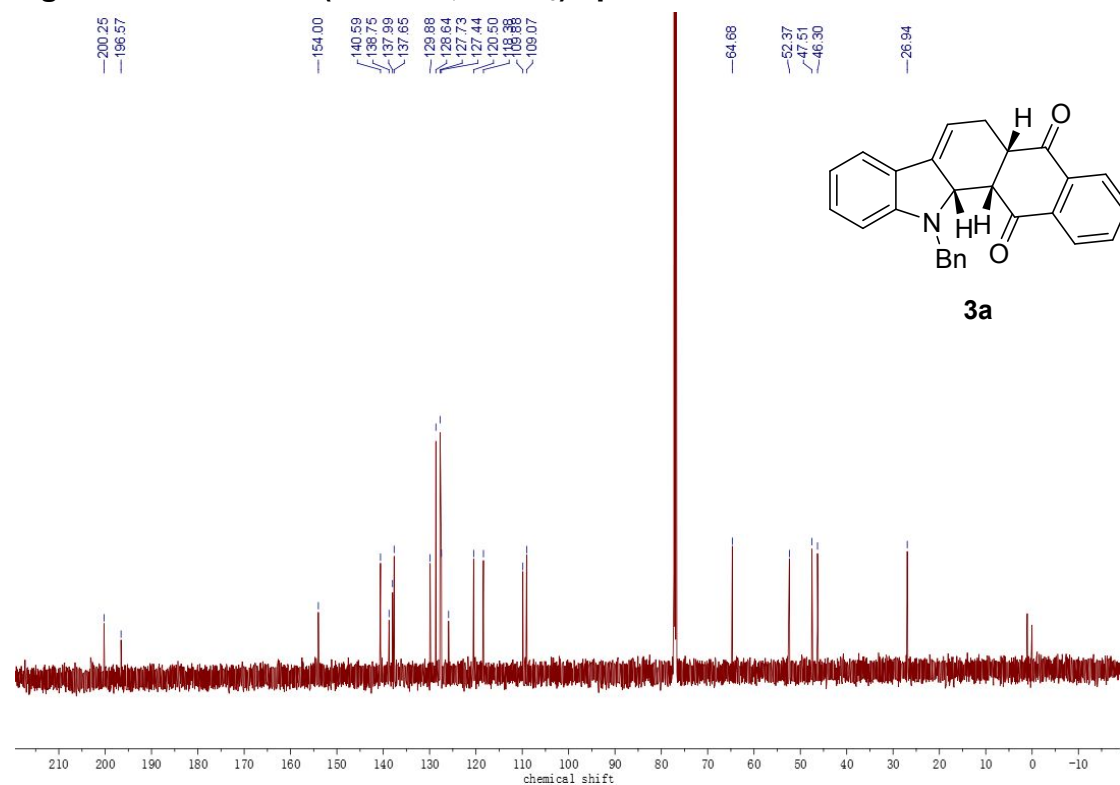

**Figure S39. HPLC spectrum of 3a**

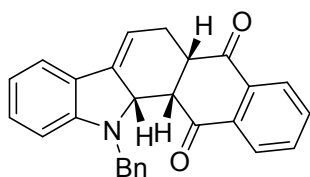

**3a** (The top one is racemic, and the bottom one is chiral)

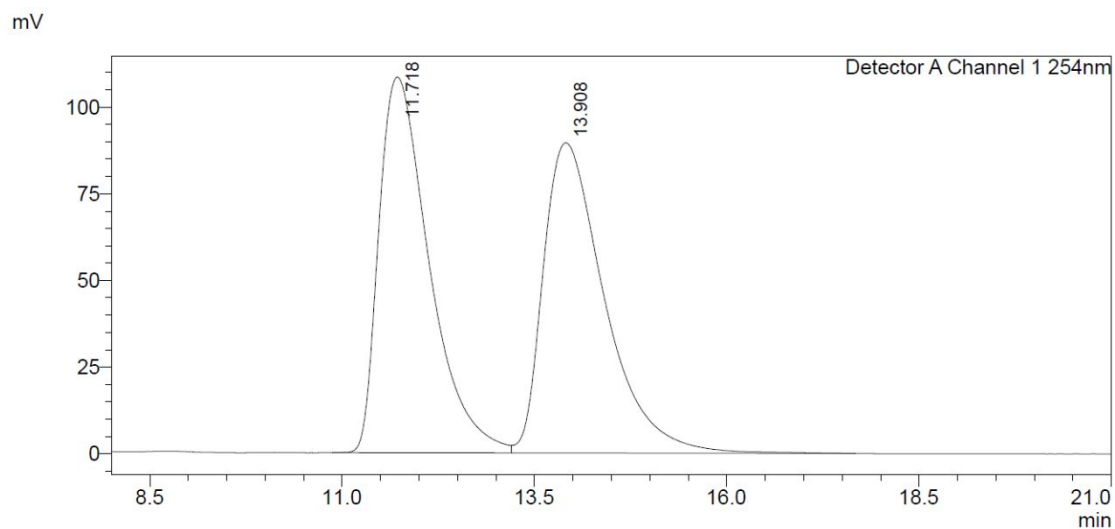

| Peak# | Ret. Time | Area    | Height | Conc.  | Area%   |
|-------|-----------|---------|--------|--------|---------|
| 1     | 11.718    | 4924652 | 108350 | 49.796 | 49.796  |
| 2     | 13.908    | 4965098 | 89467  | 50.204 | 50.204  |
| Total |           | 9889750 | 197817 |        | 100.000 |

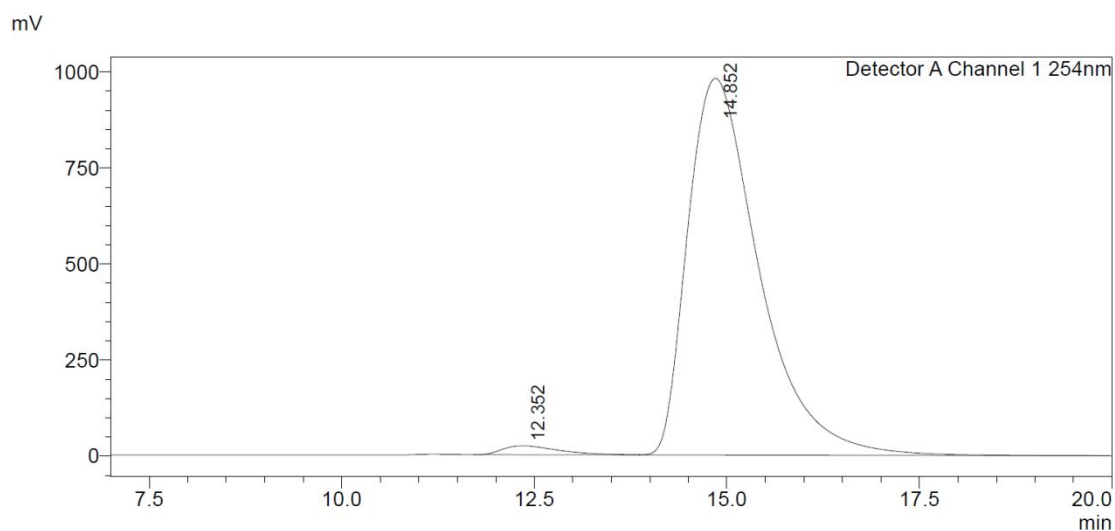

| Peak# | Ret. Time | Area     | Height  | Conc.  | Area%   |
|-------|-----------|----------|---------|--------|---------|
| 1     | 12.352    | 1171623  | 22960   | 1.818  | 1.818   |
| 2     | 14.852    | 63284870 | 980067  | 98.182 | 98.182  |
| Total |           | 64456493 | 1003026 |        | 100.000 |

**(4a*S*,11a*S*,11b*S*)-11-benzyl-5,11,11a,11b-tetrahydro-1*H*-benzo[*a*]carbazole-*e*-1,4(4a*H*)-dione (3b)**

**Figure S40.  $^1\text{H}$  NMR (600MHz,  $\text{CDCl}_3$ ) spectrum of 3b**

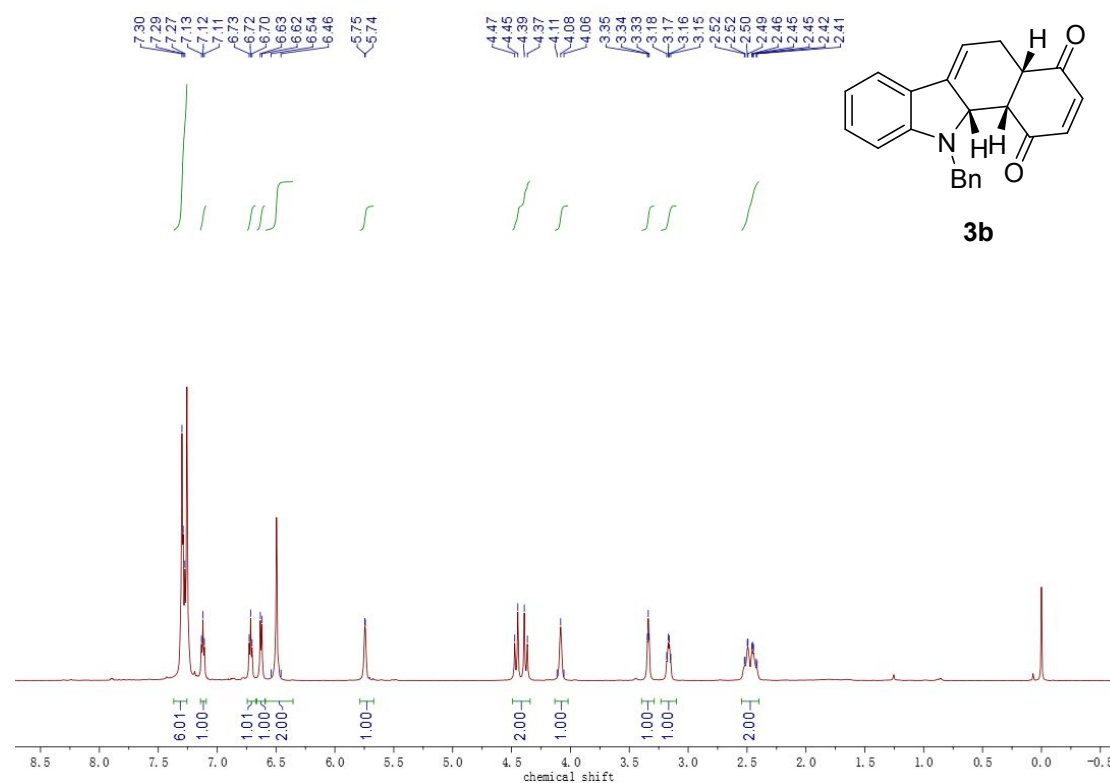

**Figure S41.  $^{13}\text{C}$  NMR (151MHz,  $\text{CDCl}_3$ ) spectrum of 3b**

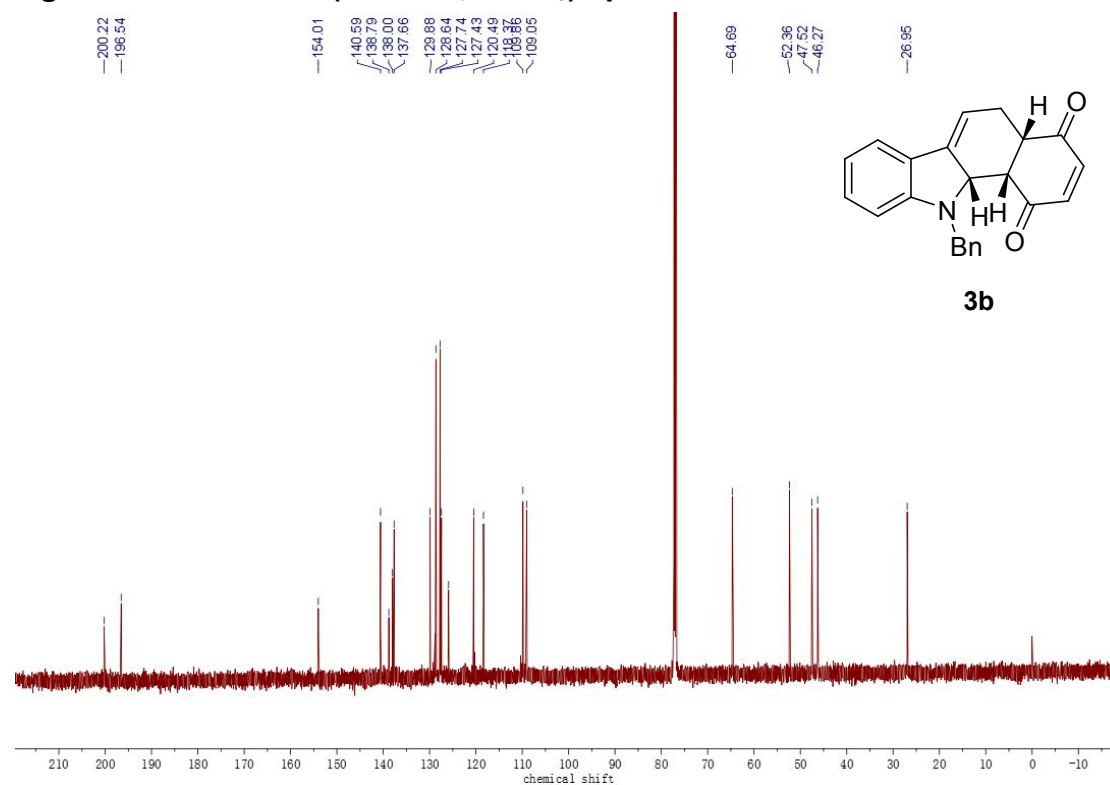

**Figure S42. HPLC spectrum of 3b**

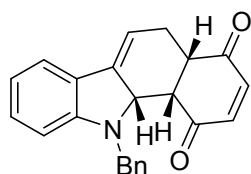

**3b** (The top one is racemic, and the bottom one is chiral)

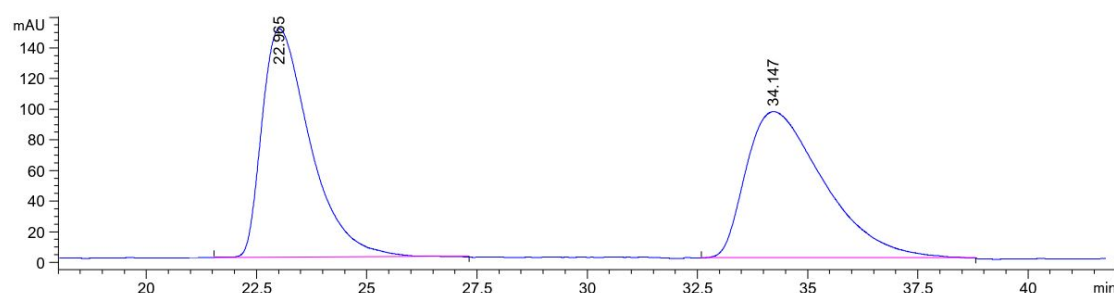

Signal 1: DAD1 A, Sig=254,4 Ref=off

| Peak # | RetTime [min] | Type | Width [min] | Area [mAU*s] | Height [mAU] | Area %  |
|--------|---------------|------|-------------|--------------|--------------|---------|
| 1      | 22.965        | MM   | 1.2827      | 1.15252e4    | 149.75708    | 49.3014 |
| 2      | 34.147        | MM   | 2.0614      | 1.18518e4    | 95.82256     | 50.6986 |

Totals : 2.33770e4 245.57964

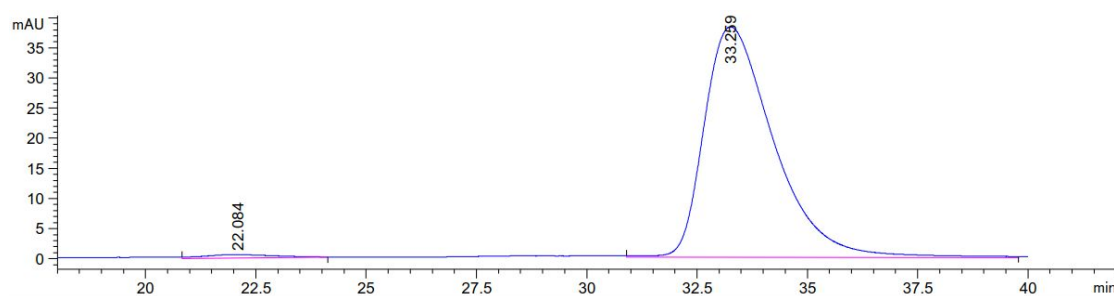

Signal 1: DAD1 A, Sig=254,4 Ref=360,100

| Peak # | RetTime [min] | Type | Width [min] | Area [mAU*s] | Height [mAU] | Area %  |
|--------|---------------|------|-------------|--------------|--------------|---------|
| 1      | 22.084        | MM   | 1.9017      | 63.66054     | 5.57939e-1   | 1.4867  |
| 2      | 33.259        | MM   | 1.8366      | 4218.44775   | 38.28151     | 98.5133 |

Totals : 4282.10829 38.83945



**(4a*S*,11a*S*,11b*S*)-11-benzyl-2,3-dimethyl-5,11,11a,11b-tetrahydro-1*H*-benzo[*a*]carbazole-1,4(4a*H*)-dione (3c)**

**Figure S43.  $^1\text{H}$  NMR (600MHz,  $\text{CDCl}_3$ ) spectrum of 3c**

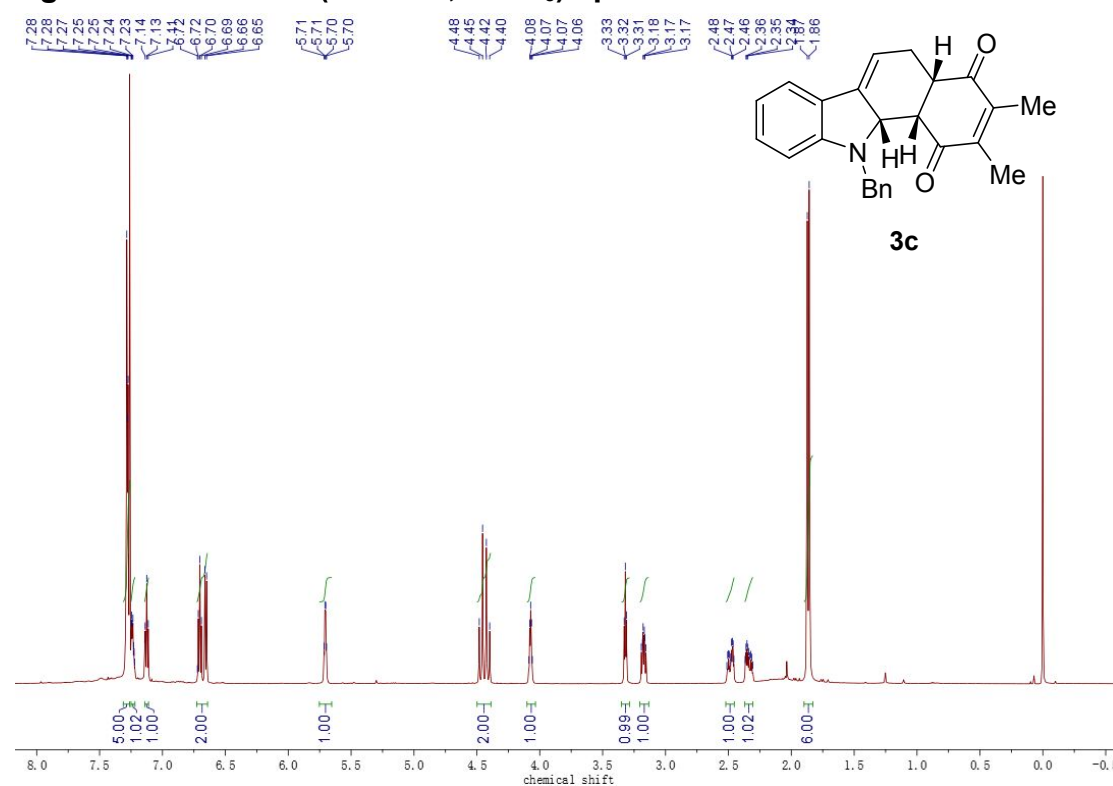

**Figure S44.  $^{13}\text{C}$  NMR (151MHz,  $\text{CDCl}_3$ ) spectrum of 3c**

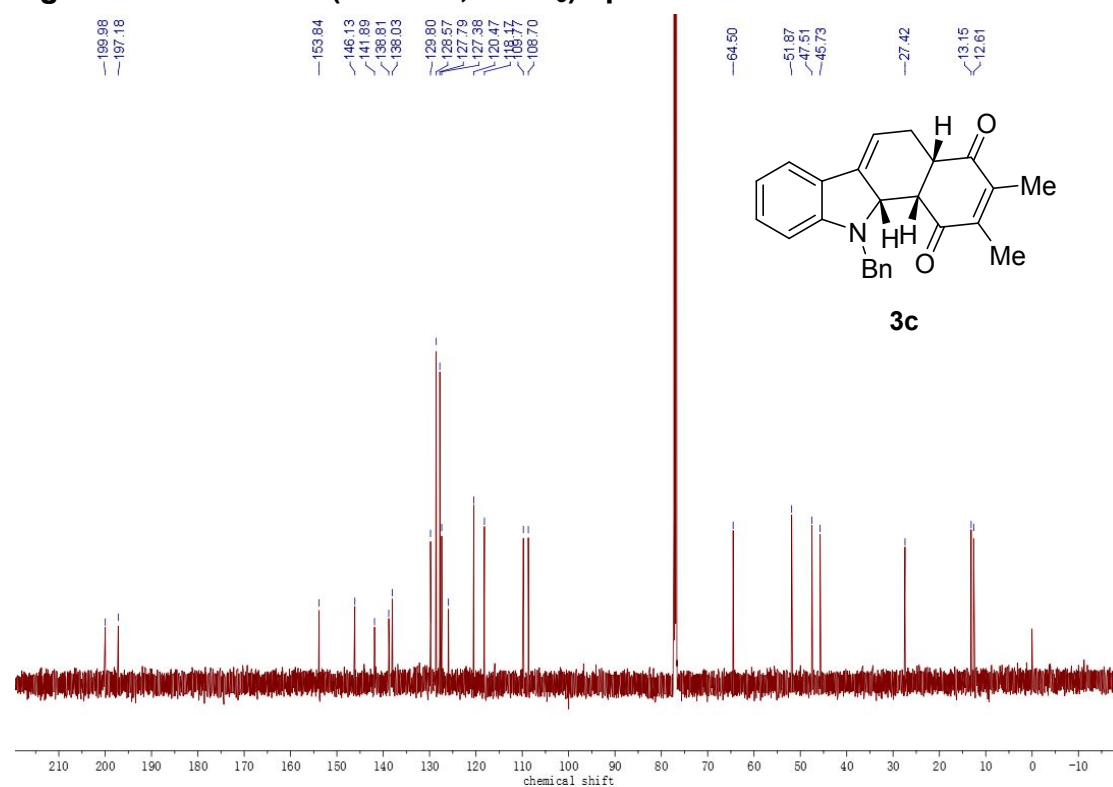

**Figure S45. HPLC spectrum of 3c**

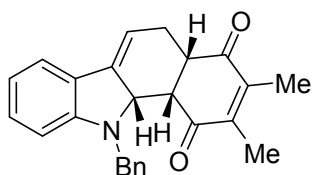

**3c** (The top one is racemic, and the bottom one is chiral)

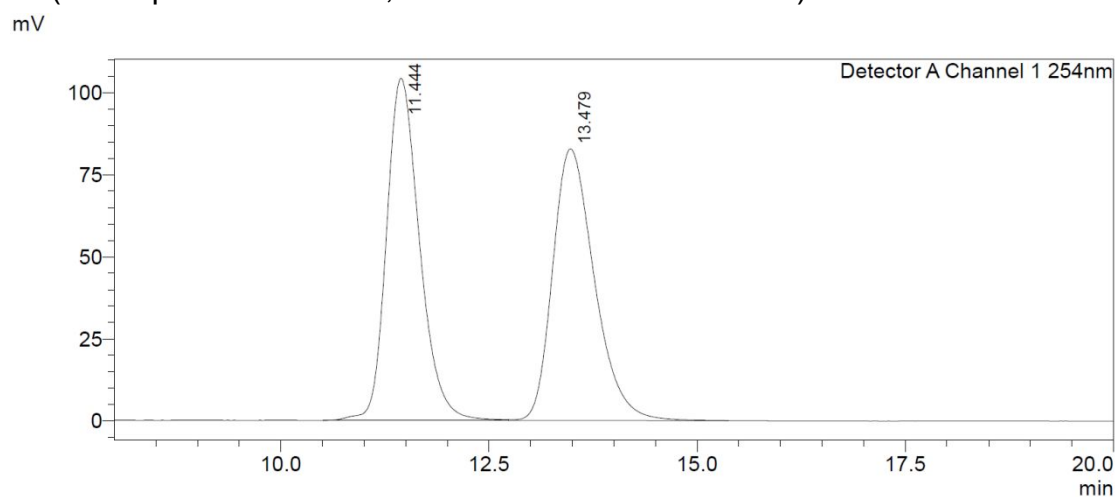

Detector A Channel 1 254nm

| Peak  | Ret. Time | Area    | Height | Area%   | Conc.  |
|-------|-----------|---------|--------|---------|--------|
| 1     | 11.444    | 2887145 | 104188 | 49.983  | 49.983 |
| 2     | 13.479    | 2889104 | 82711  | 50.017  | 50.017 |
| Total |           | 5776249 | 186898 | 100.000 |        |

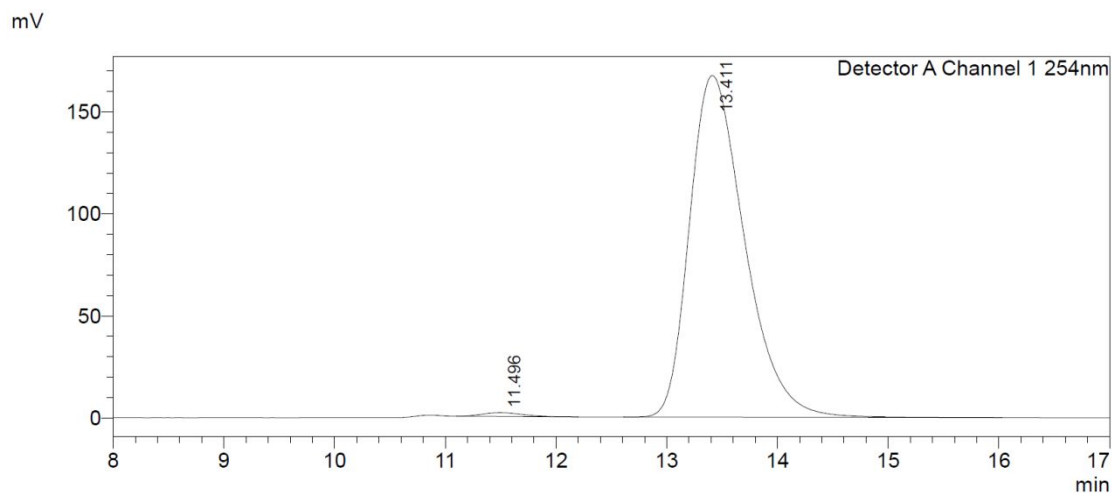

Detector A Channel 1 254nm

| Peak  | Ret. Time | Area    | Height | Area%   | Conc.  |
|-------|-----------|---------|--------|---------|--------|
| 1     | 11.496    | 47770   | 1870   | 0.819   | 0.819  |
| 2     | 13.411    | 5782979 | 167468 | 99.181  | 99.181 |
| Total |           | 5830749 | 169338 | 100.000 |        |

(4a*S*,11a*S*,11b*S*)-11-benzyl-3-methyl-5,11,11a,11b-tetrahydro-1*H*-benzo[*a*]carbazole-1,4(4a*H*)-dione and  
 (4a*S*,11a*S*,11b*S*)-11-benzyl-2-methyl-5,11,11a,11b-tetrahydro-1*H*-benzo[*a*]carbazole-1,4(4a*H*)-dione (3d and 3d')

Figure S46. <sup>1</sup>H NMR (600MHz, CDCl<sub>3</sub>) spectrum of 3d and 3d'

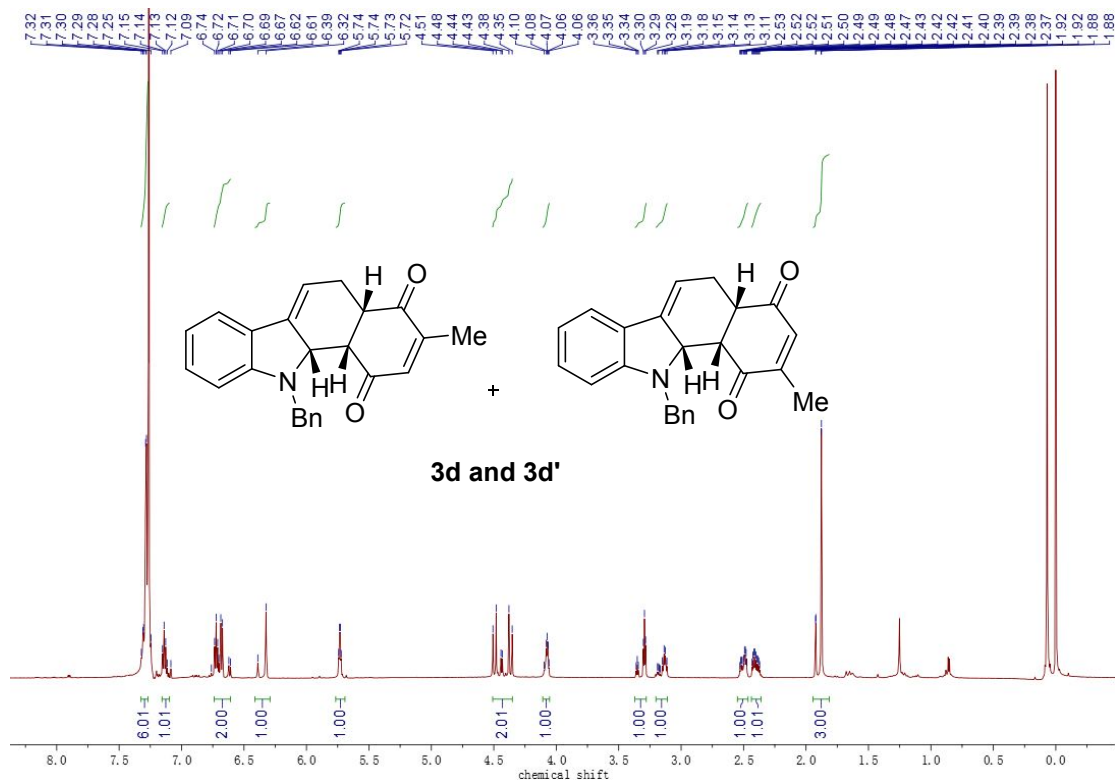

Figure S47. <sup>13</sup>C NMR (151MHz, CDCl<sub>3</sub>) spectrum of 3d and 3d'

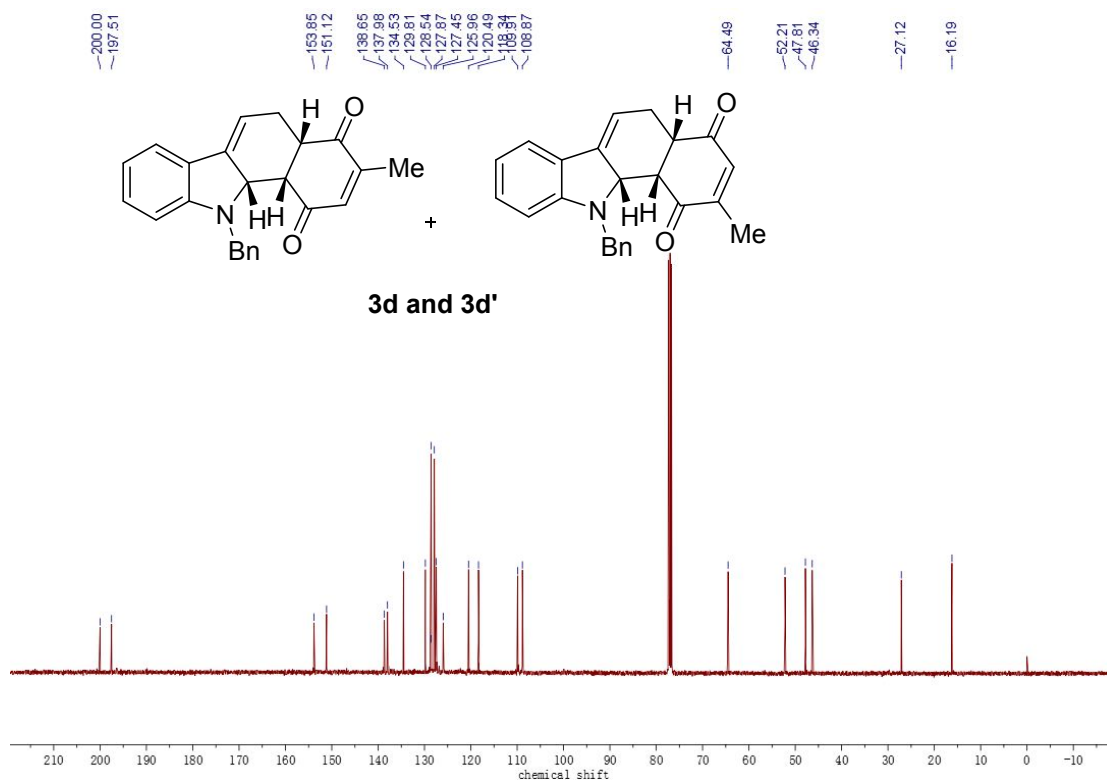

**Figure S48. HPLC spectrum of 3d and 3d'**

**3d and 3d'** (The top one is racemic, and the bottom one is chiral)

mV

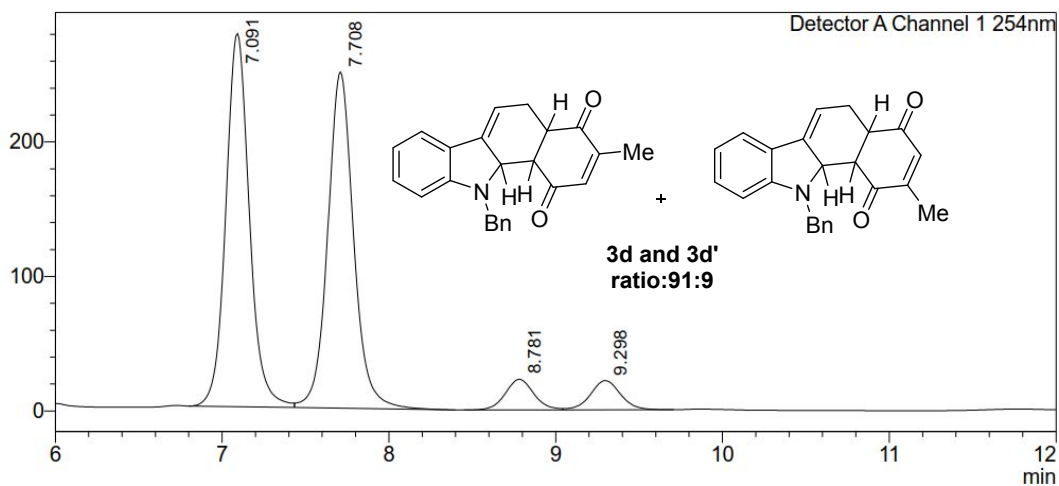

Detector A Channel 1 254nm

| Peak# | Ret. Time | Area    | Height | Conc.  | Area%  |
|-------|-----------|---------|--------|--------|--------|
| 1     | 7.091     | 2717134 | 277432 | 45.524 | 45.524 |

| Peak# | Ret. Time | Area    | Height | Conc.  | Area%   |
|-------|-----------|---------|--------|--------|---------|
| 2     | 7.708     | 2707090 | 250094 | 45.356 | 45.356  |
| 3     | 8.781     | 271620  | 22759  | 4.551  | 4.551   |
| 4     | 9.298     | 272688  | 21752  | 4.569  | 4.569   |
| Total |           | 5968532 | 572036 |        | 100.000 |

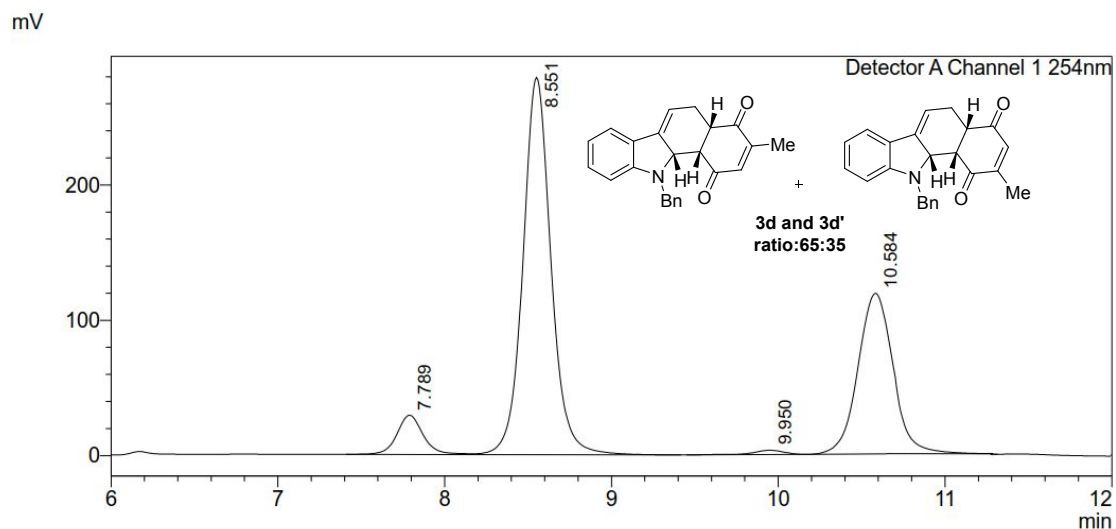

| Peak# | Ret. Time | Area    | Height | Conc.  | Area%   |
|-------|-----------|---------|--------|--------|---------|
| 1     | 7.789     | 317341  | 28955  | 5.740  | 5.740   |
| 2     | 8.551     | 3265517 | 278780 | 59.066 | 59.066  |
| 3     | 9.950     | 42335   | 3202   | 0.766  | 0.766   |
| 4     | 10.584    | 1903352 | 118724 | 34.428 | 34.428  |
| Total |           | 5528545 | 429661 |        | 100.000 |

(5a*S*,12a*S*,12b*S*)-12-benzyl-4-hydroxy-6,12,12a,12b-tetrahydro-5*H*-naphtho[2,3-*a*]carbazole-5,13(5a*H*)-dione and  
 (5a*S*,12a*S*,12b*S*)-12-benzyl-1-hydroxy-6,12,12a,12b-tetrahydro-5*H*-naphtho[2,3-*a*]carbazole-5,13(5a*H*)-dione (3e and 3e')

Figure S49. <sup>1</sup>H NMR (600MHz, CDCl<sub>3</sub>) spectrum of 3e and 3e'

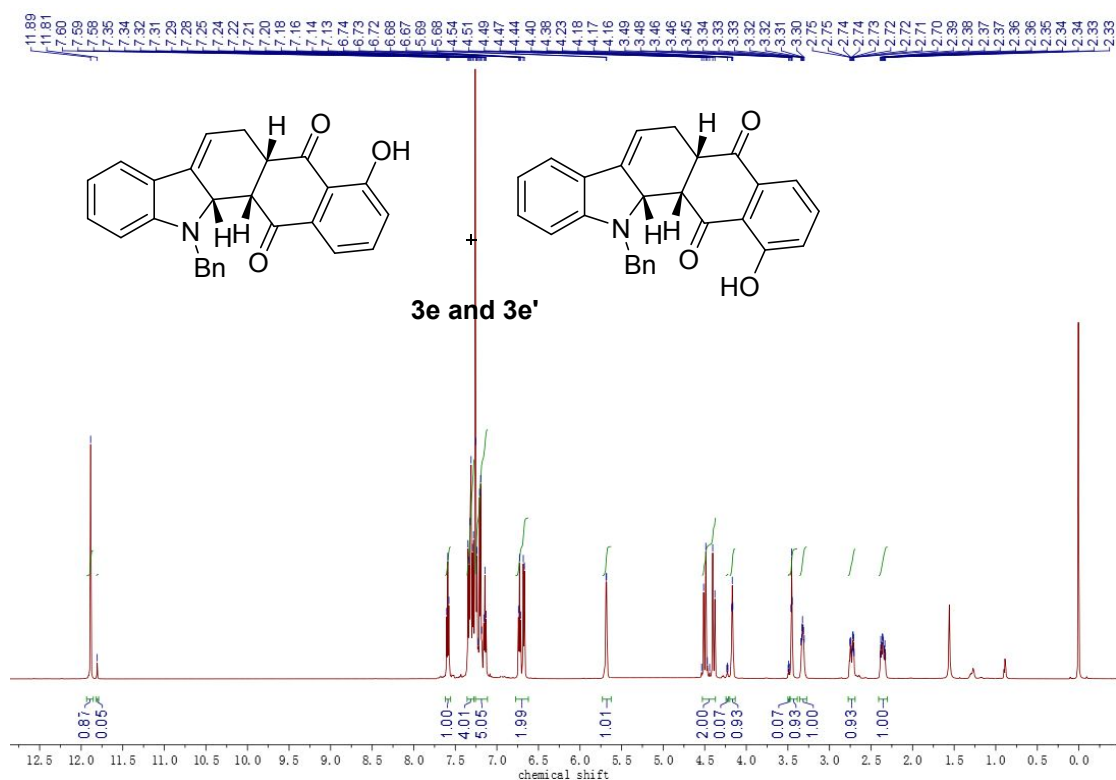

Figure S50.  $^{13}\text{C}$  NMR (151MHz,  $\text{CDCl}_3$ ) spectrum of 3e and 3e'

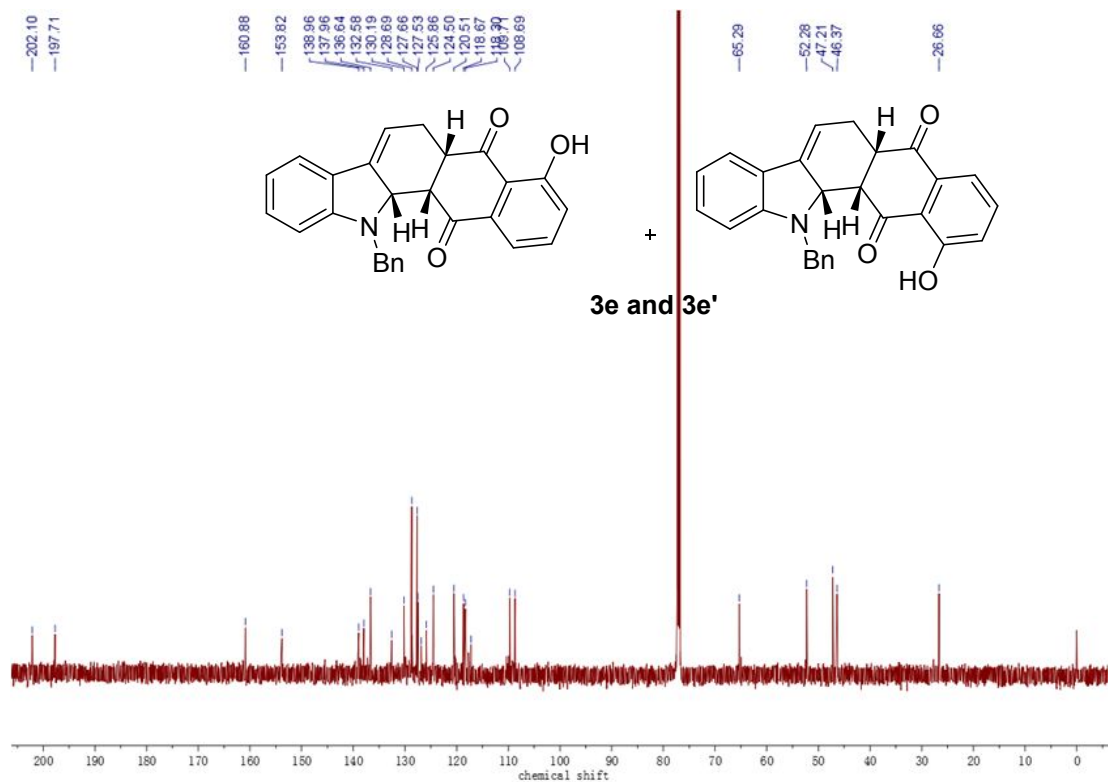

Figure S51. HPLC spectrum of 3e and 3e'  
3e and 3e' (The top one is racemic, and the bottom one is chiral)



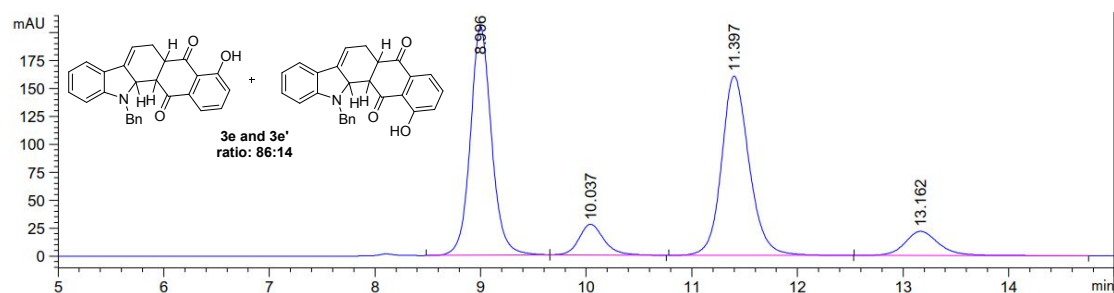

Signal 2: DAD1 B, Sig=365,4 Ref=off

| Peak # | RetTime [min] | Type | Width [min] | Area [mAU*s] | Height [mAU] | Area %  |
|--------|---------------|------|-------------|--------------|--------------|---------|
| 1      | 8.996         | BB   | 0.2121      | 2841.61572   | 204.51073    | 42.6091 |
| 2      | 10.037        | BB   | 0.2481      | 446.62421    | 27.40537     | 6.6970  |
| 3      | 11.397        | BB   | 0.2749      | 2897.87451   | 160.30252    | 43.4527 |
| 4      | 13.162        | BB   | 0.3389      | 482.91556    | 21.59663     | 7.2412  |

Totals : 6669.03000 413.81525

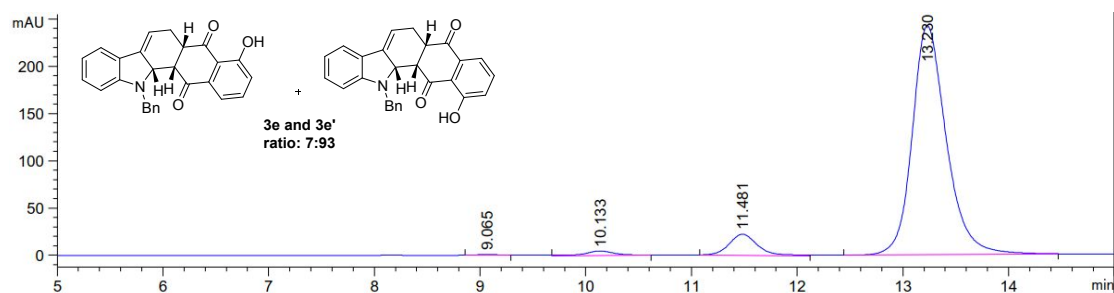

Signal 2: DAD1 B, Sig=365,4 Ref=off

| Peak # | RetTime [min] | Type | Width [min] | Area [mAU*s] | Height [mAU] | Area %  |
|--------|---------------|------|-------------|--------------|--------------|---------|
| 1      | 9.065         | MM   | 0.2078      | 10.39936     | 8.34021e-1   | 0.1736  |
| 2      | 10.133        | MM   | 0.3292      | 94.03818     | 4.76059      | 1.5697  |
| 3      | 11.481        | MM   | 0.3166      | 426.49530    | 22.44905     | 7.1192  |
| 4      | 13.230        | MM   | 0.3748      | 5459.86328   | 242.75932    | 91.1375 |

Totals : 5990.79612 270.80299

(5a*S*,12a*S*,12b*S*)-12-benzyl-1,4-dihydroxy-6,12,12a,12b-tetrahydro-5*H*-na  
phtho[2,3-*a*]carbazole-5,13(5a*H*)-dione (3f)

Figure S52.  $^1\text{H}$  NMR (600MHz,  $\text{CDCl}_3$ ) spectrum of **3f**

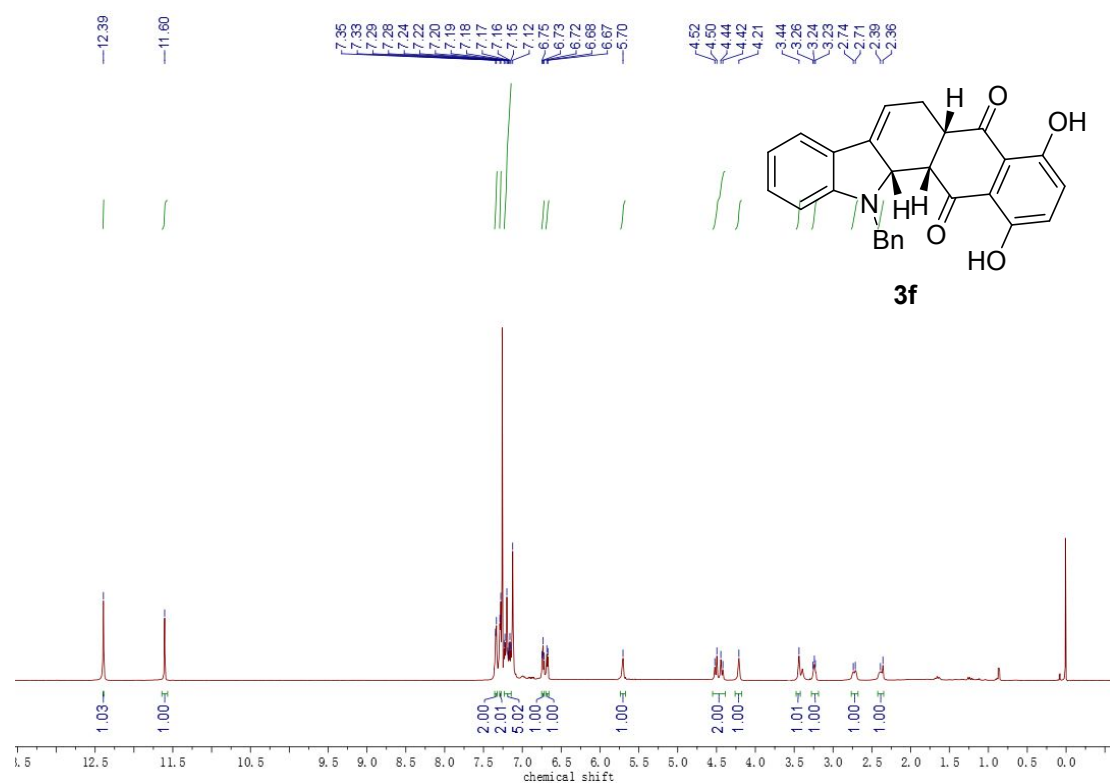

Figure S53.  $^{13}\text{C}$  NMR (151MHz,  $\text{CDCl}_3$ ) spectrum of **3f**

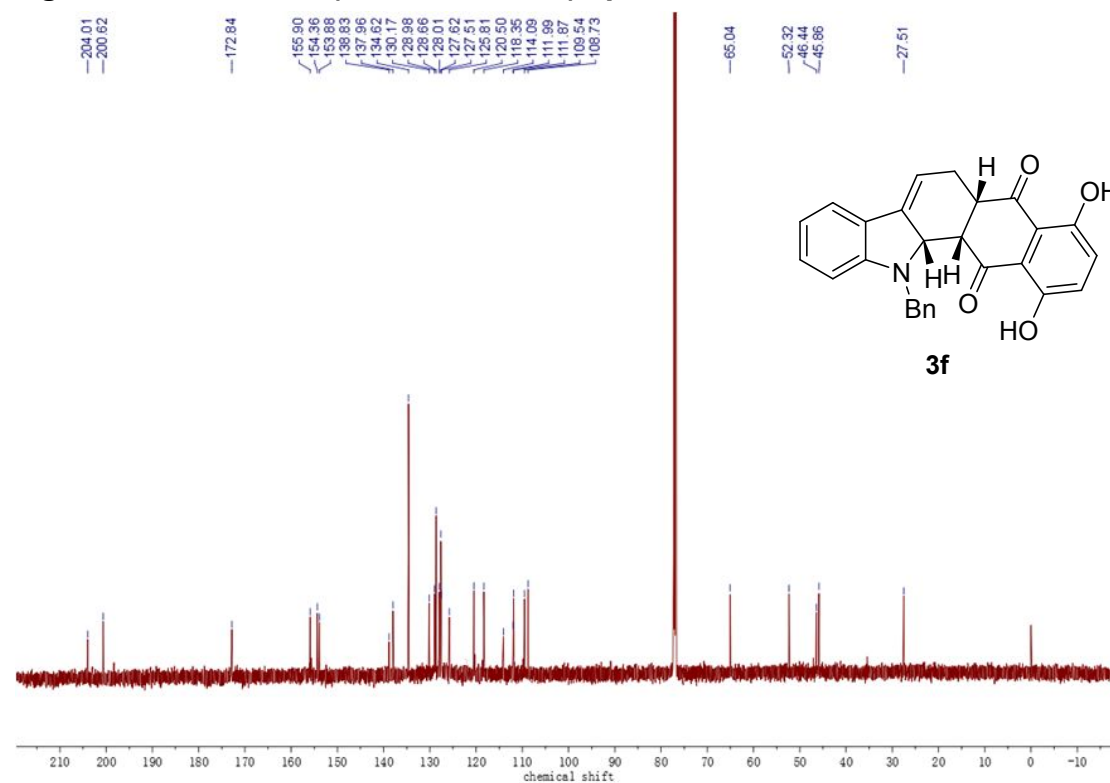

Figure S54. HPLC spectrum of **3f**



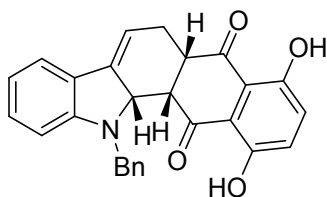

**3f** (The top one is racemic, and the bottom one is chiral)

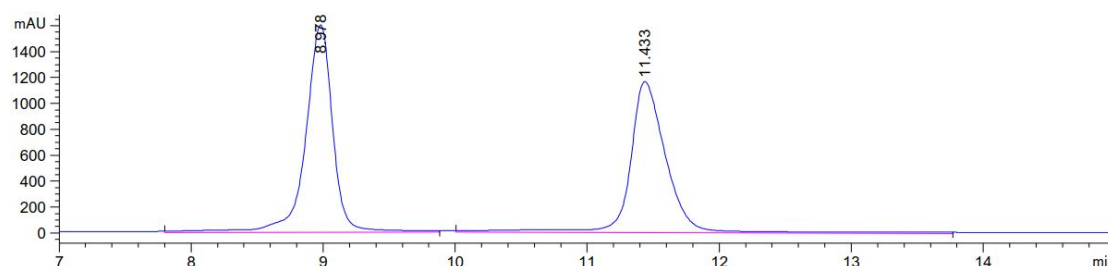

Signal 1: DAD1 A, Sig=254,4 Ref=360,100

| Peak # | RetTime [min] | Type | Width [min] | Area [mAU*s] | Height [mAU] | Area %  |
|--------|---------------|------|-------------|--------------|--------------|---------|
| 1      | 8.978         | MM   | 0.2428      | 2.33431e4    | 1602.43994   | 50.5501 |
| 2      | 11.433        | MM   | 0.3260      | 2.28351e4    | 1167.54492   | 49.4499 |

Totals : 4.61782e4 2769.98486

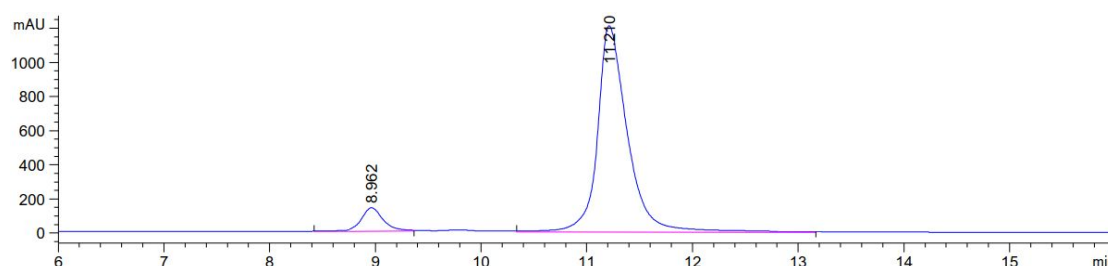

Signal 1: DAD1 A, Sig=254,4 Ref=360,100

| Peak # | RetTime [min] | Type | Width [min] | Area [mAU*s] | Height [mAU] | Area %  |
|--------|---------------|------|-------------|--------------|--------------|---------|
| 1      | 8.962         | MM   | 0.2403      | 1989.16333   | 137.96635    | 7.6068  |
| 2      | 11.210        | MM   | 0.3329      | 2.41606e4    | 1209.45483   | 92.3932 |

Totals : 2.61498e4 1347.42119

**(4a*S*,11a*S*,11b*S*)-11-benzyl-2,3-dichloro-5,11,11a,11b-tetrahydro-1*H*-benz**

**o[a]carbazole-1,4(4aH)-dione (3h)**

**Figure S55. <sup>1</sup>H NMR (600MHz, CDCl<sub>3</sub>) spectrum of 3h**

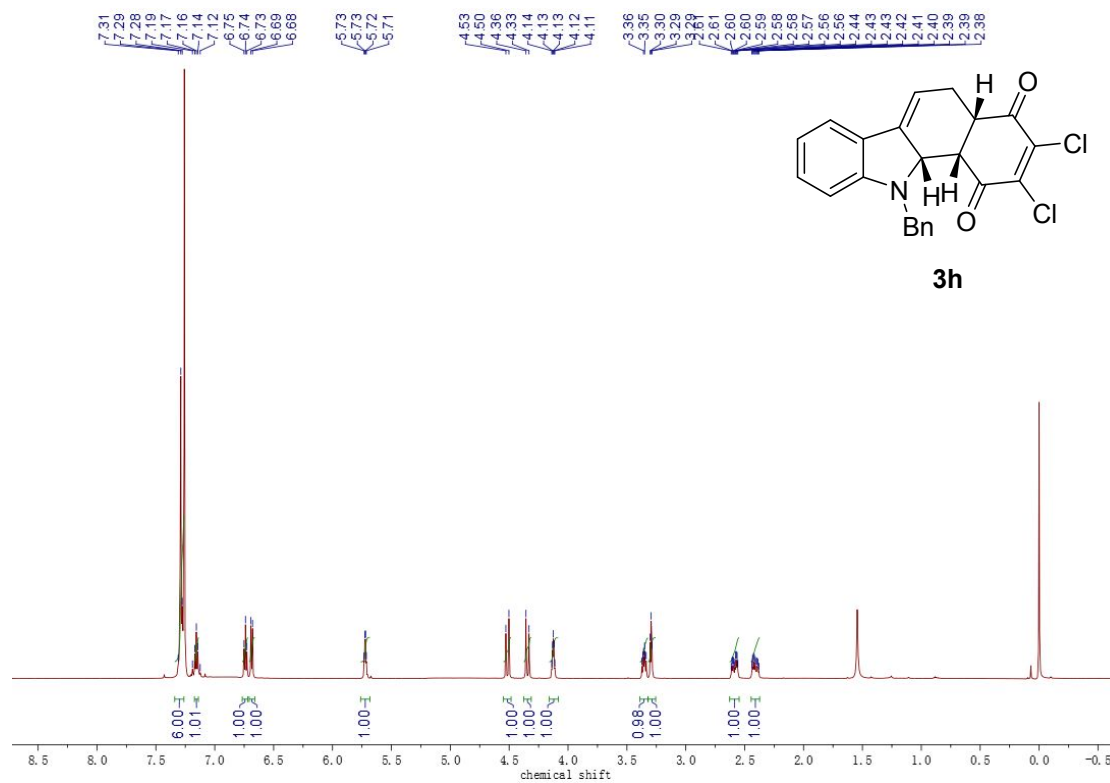

**Figure S56. <sup>13</sup>C NMR (151MHz, CDCl<sub>3</sub>) spectrum of 3h**

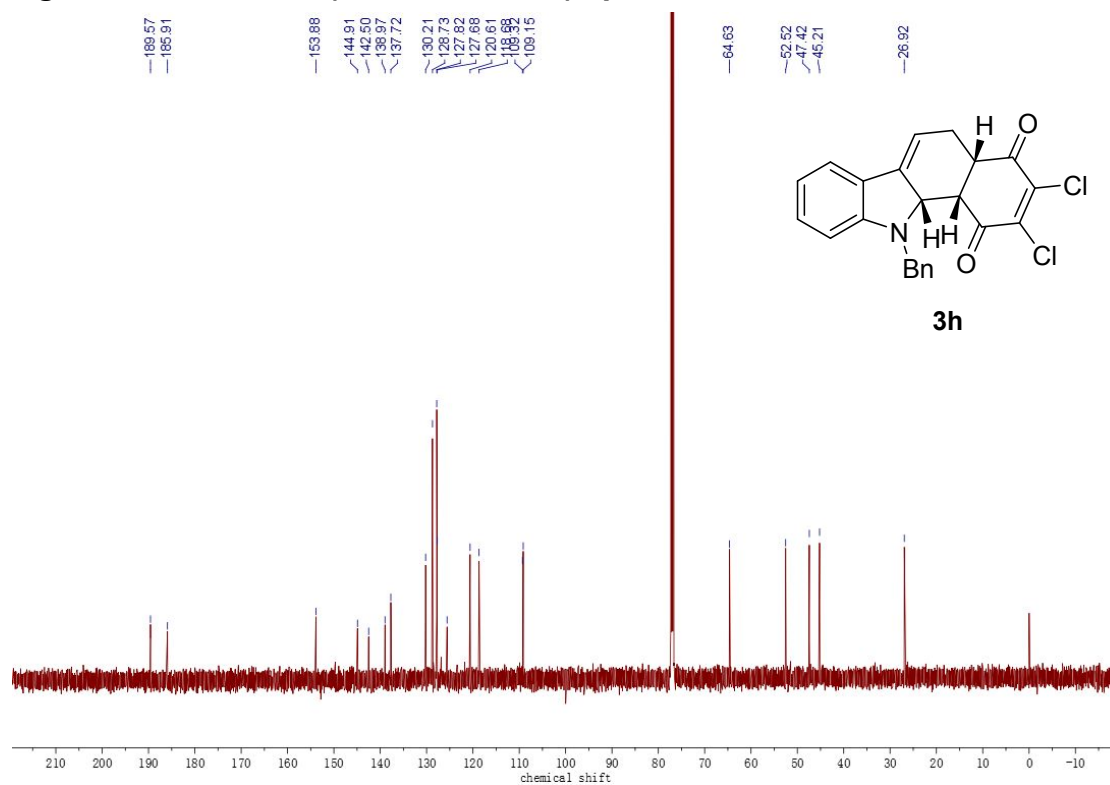

**Figure S57. HPLC spectrum of 3h**

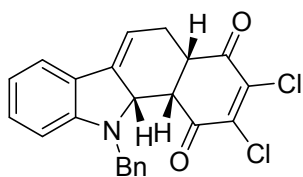

**3h** (The top one is racemic, and the bottom one is chiral)

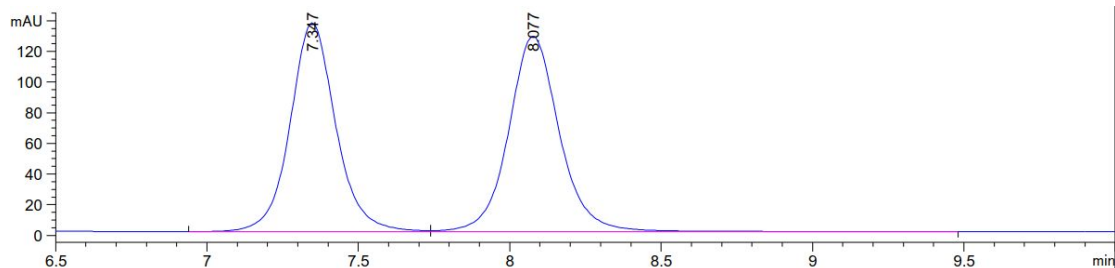

Signal 1: DAD1 A, Sig=254,4 Ref=off

| Peak # | RetTime [min] | Type | Width [min] | Area [mAU*s] | Height [mAU] | Area %  |
|--------|---------------|------|-------------|--------------|--------------|---------|
| 1      | 7.347         | BV   | 0.1603      | 1428.26379   | 136.19902    | 49.0044 |
| 2      | 8.077         | VB   | 0.1760      | 1486.30042   | 127.52252    | 50.9956 |

Totals : 2914.56421 263.72154

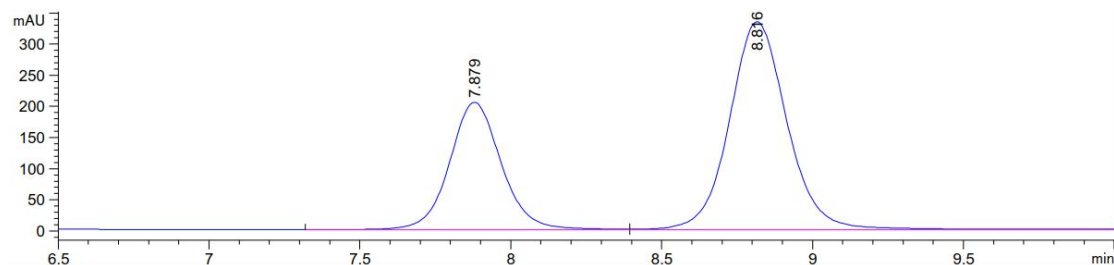

Signal 1: DAD1 A, Sig=254,4 Ref=off

| Peak # | RetTime [min] | Type | Width [min] | Area [mAU*s] | Height [mAU] | Area %  |
|--------|---------------|------|-------------|--------------|--------------|---------|
| 1      | 7.879         | BV   | 0.1811      | 2436.79175   | 204.38507    | 35.5032 |
| 2      | 8.816         | VB   | 0.2029      | 4426.79883   | 333.43723    | 64.4968 |

Totals : 6863.59058 537.82230

**(5a*S*,12a*S*,12b*S*)-12-benzyl-8-bromo-6,12,12a,12b-tetrahydro-5*H*-naphtho**

**[2,3-a]carbazole-5,13(5aH)-dione (4b)**

**Figure S58. <sup>1</sup>H NMR (600MHz, CDCl<sub>3</sub>) spectrum of 4b**

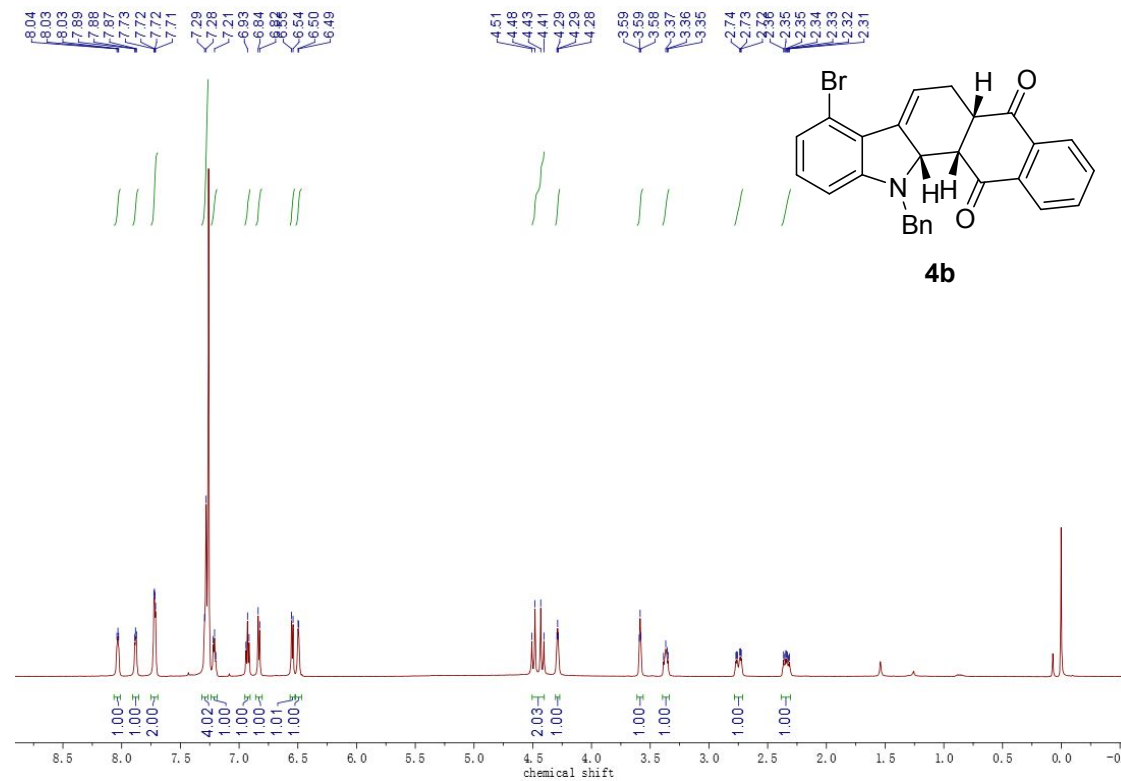

**Figure S59. <sup>13</sup>C NMR (151MHz, CDCl<sub>3</sub>) spectrum of 4b**

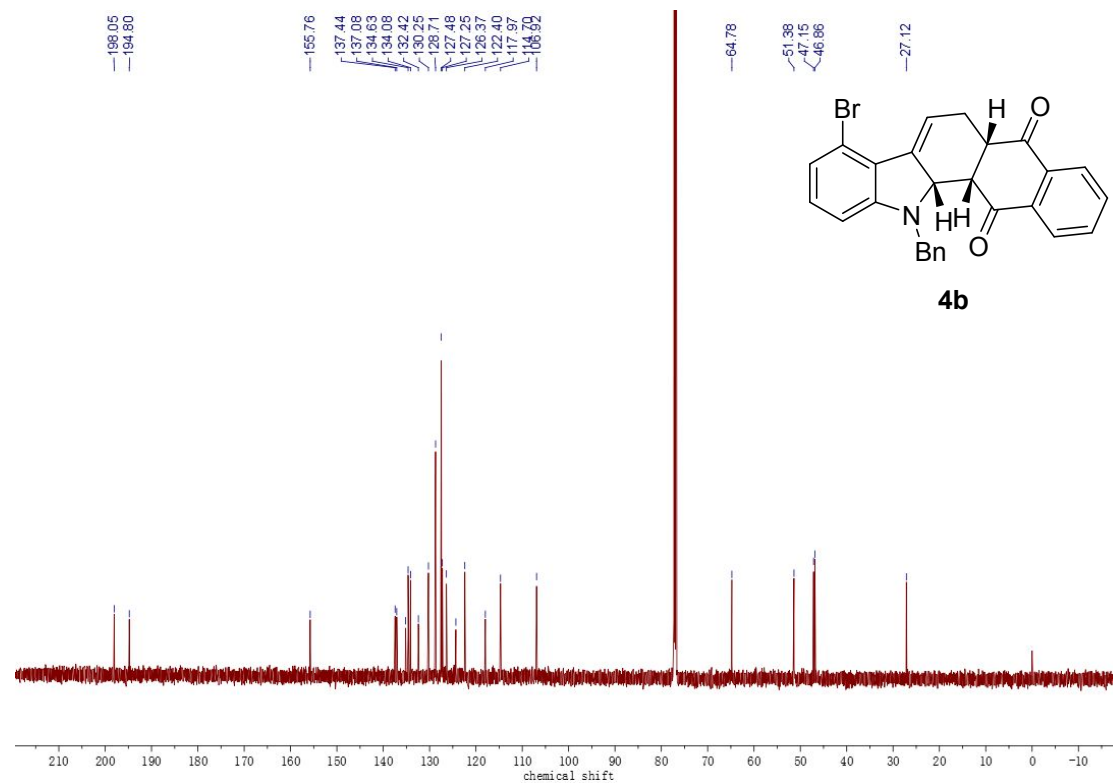

**Figure S60. HPLC spectrum of 4b**

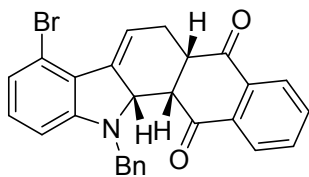

**4b** (The top one is racemic, and the bottom one is chiral)

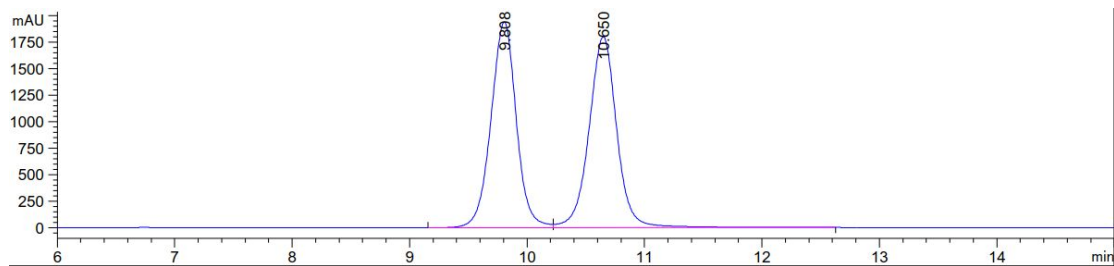

Signal 1: DAD1 A, Sig=254,4 Ref=off

| Peak # | RetTime [min] | Type | Width [min] | Area [mAU*s] | Height [mAU] | Area %  |
|--------|---------------|------|-------------|--------------|--------------|---------|
| 1      | 9.808         | BV   | 0.2290      | 2.90761e4    | 1938.37561   | 49.5564 |
| 2      | 10.650        | VBA  | 0.2501      | 2.95966e4    | 1797.44495   | 50.4436 |

Totals : 5.86726e4 3735.82056

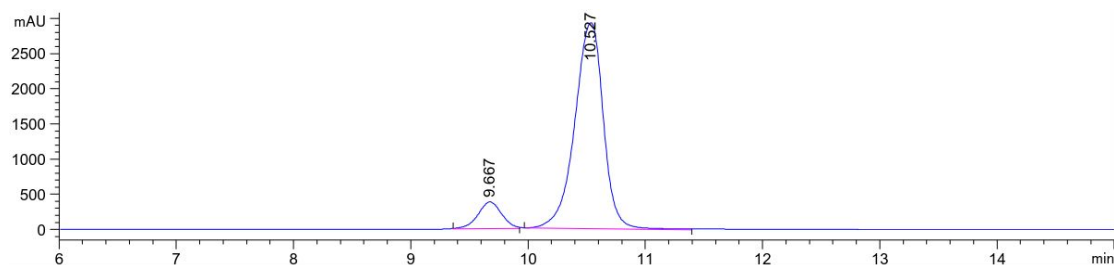

Signal 1: DAD1 A, Sig=254,4 Ref=360,100

| Peak # | RetTime [min] | Type | Width [min] | Area [mAU*s] | Height [mAU] | Area %  |
|--------|---------------|------|-------------|--------------|--------------|---------|
| 1      | 9.667         | MM   | 0.2334      | 2424.0472    | 238.15424    | 4.6713  |
| 2      | 10.527        | MM   | 0.2818      | 4.94683e4    | 2925.92139   | 95.3287 |

Totals : 5.18923e4 3164.07562

**(5a*S*,12a*S*,12b*S*)-12-benzyl-8-chloro-6,12,12a,12b-tetrahydro-5*H*-naphtho**

**[2,3-a]carbazole-5,13(5aH)-dione (4c)**

**Figure S61. <sup>1</sup>H NMR (600MHz, CDCl<sub>3</sub>) spectrum of 4c**

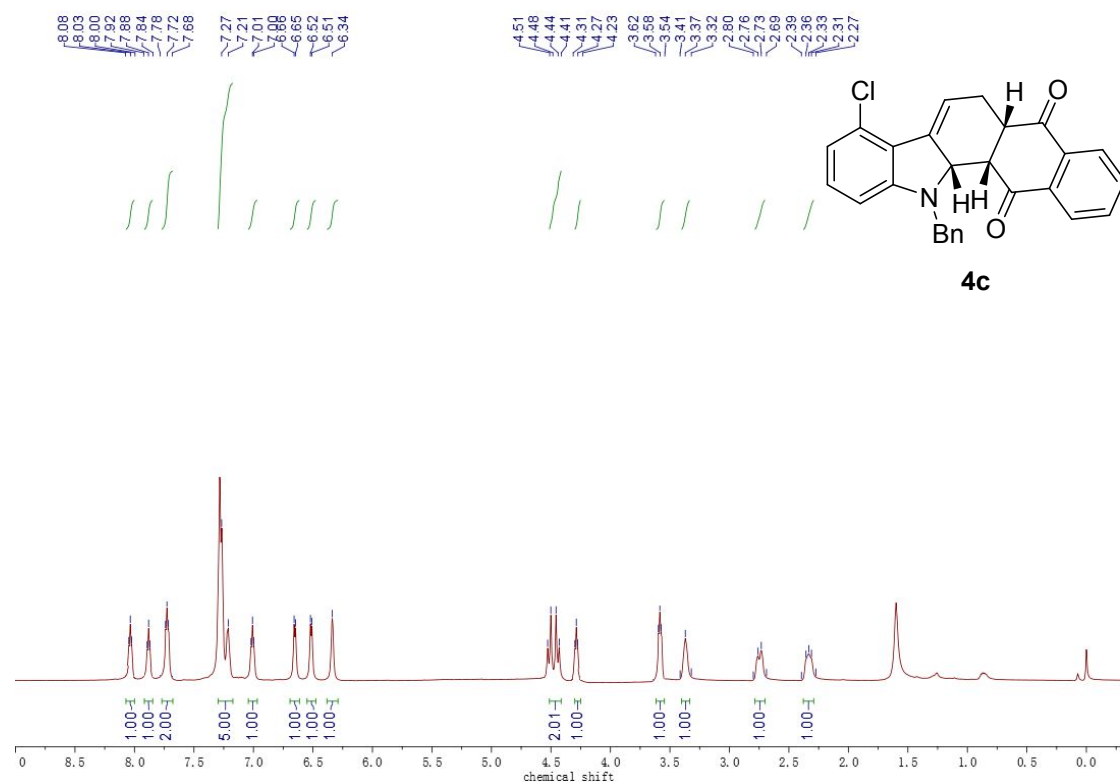

**Figure S62. <sup>13</sup>C NMR (151MHz, CDCl<sub>3</sub>) spectrum of 4c**

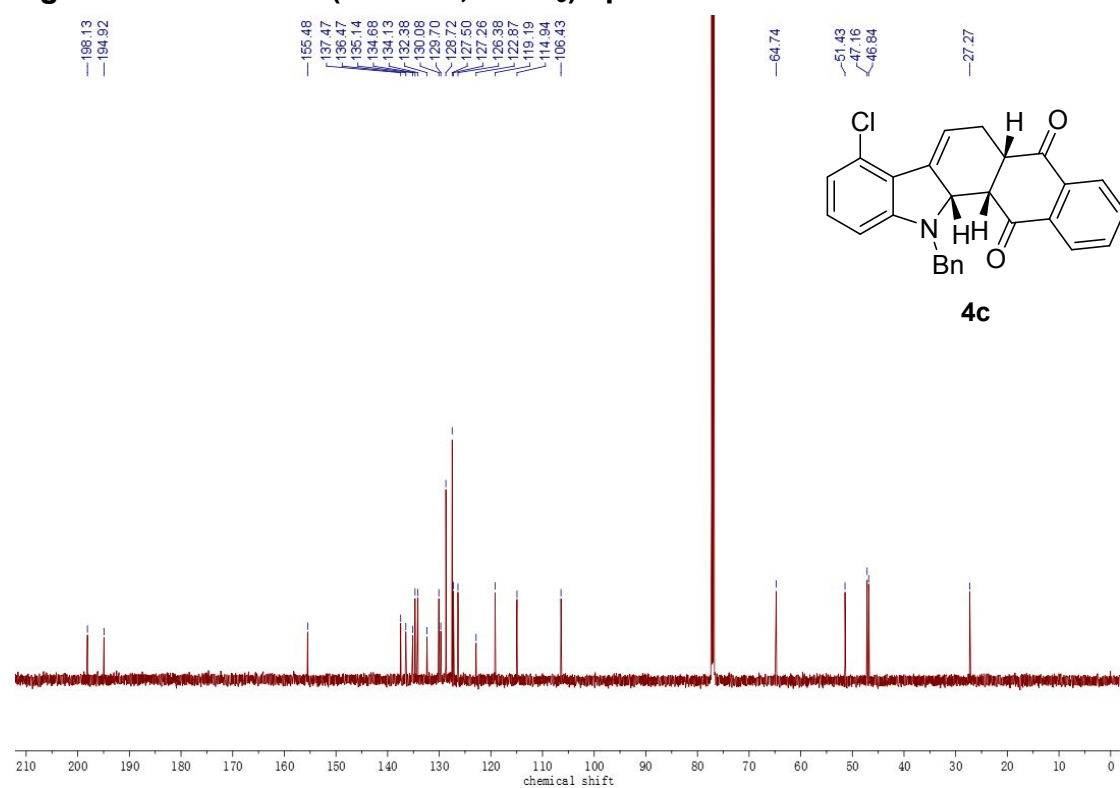

**Figure S63. HPLC spectrum of 4c**



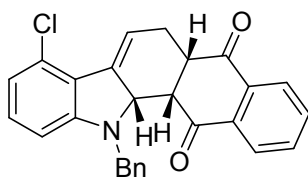

**4c** (The top one is racemic, and the bottom one is chiral)

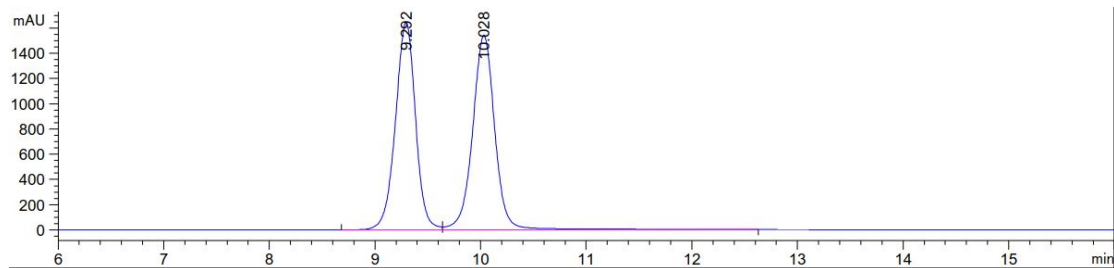

Signal 1: DAD1 A, Sig=254,4 Ref=off

| Peak # | RetTime [min] | Type | Width [min] | Area [mAU*s] | Height [mAU] | Area %  |
|--------|---------------|------|-------------|--------------|--------------|---------|
| 1      | 9.292         | BV   | 0.2021      | 2.17722e4    | 1648.36963   | 48.9440 |
| 2      | 10.028        | VBA  | 0.2237      | 2.27117e4    | 1543.62305   | 51.0560 |

Totals : 4.44839e4 3191.99268

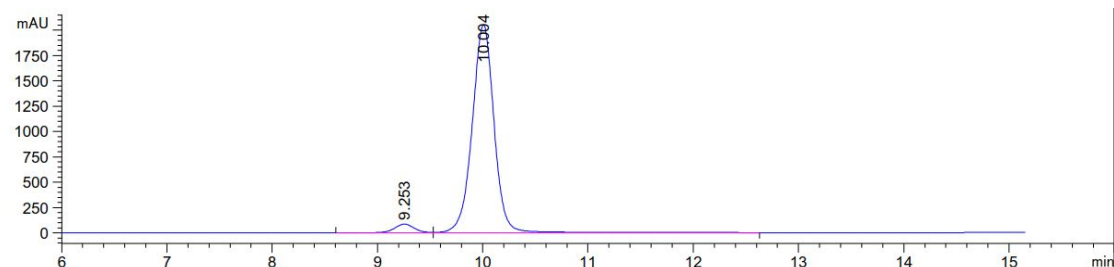

Signal 1: DAD1 A, Sig=254,4 Ref=off

| Peak # | RetTime [min] | Type | Width [min] | Area [mAU*s] | Height [mAU] | Area %  |
|--------|---------------|------|-------------|--------------|--------------|---------|
| 1      | 9.253         | BV   | 0.1997      | 1111.04224   | 85.43491     | 3.6090  |
| 2      | 10.004        | VBA  | 0.2208      | 2.96744e4    | 2051.11548   | 96.3910 |

Totals : 3.07854e4 2136.55039

**(5a*S*,12a*S*,12b*S*)-12-benzyl-9-bromo-6,12,12a,12b-tetrahydro-5*H*-naphtho**

**[2,3-a]carbazole-5,13(5*a*H)-dione (4d)**

**Figure S64. <sup>1</sup>H NMR (600MHz, CDCl<sub>3</sub>) spectrum of 4d**

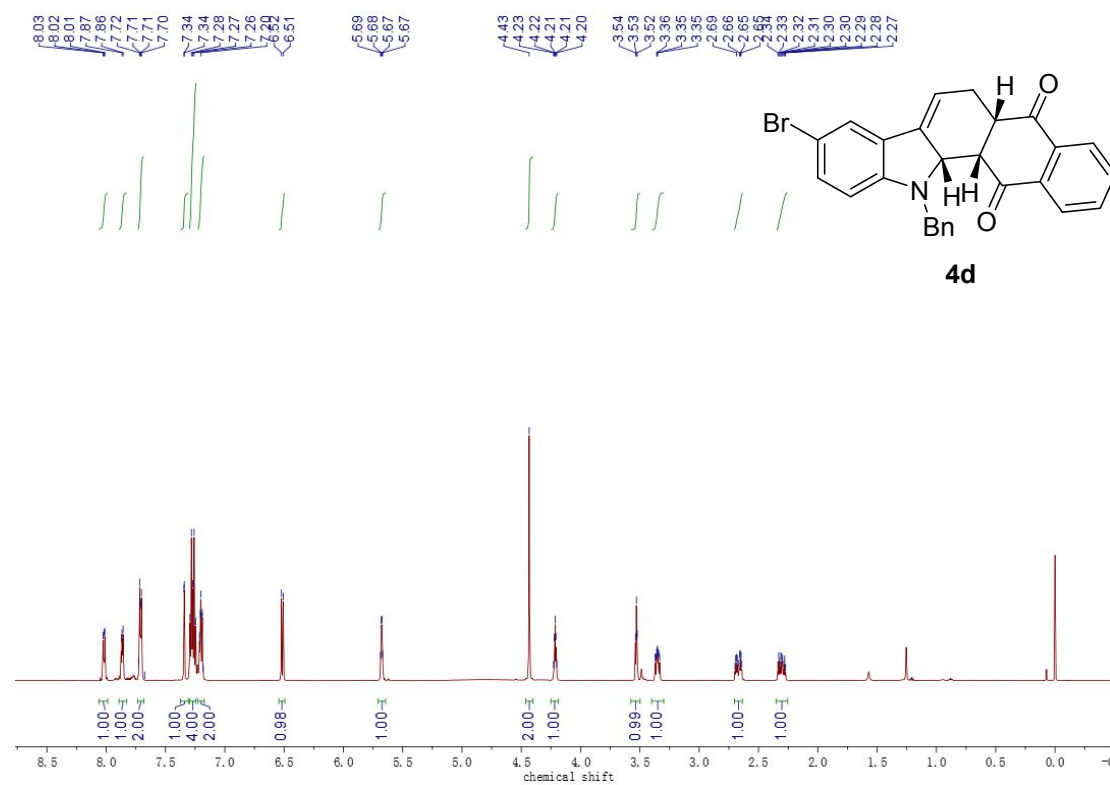

**Figure S65. <sup>13</sup>C NMR (151MHz, CDCl<sub>3</sub>) spectrum of 4d**

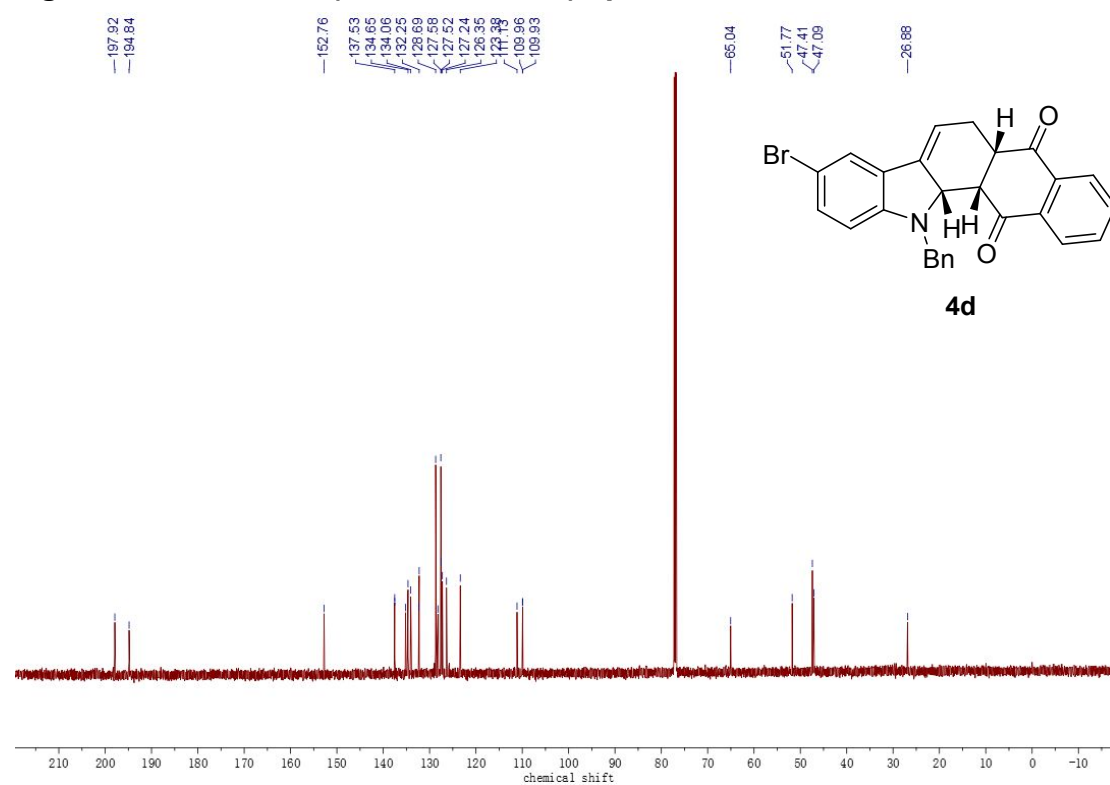

**Figure S66. HPLC spectrum of 4d**



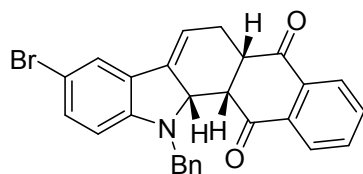

**4d** (The top one is racemic, and the bottom one is chiral)

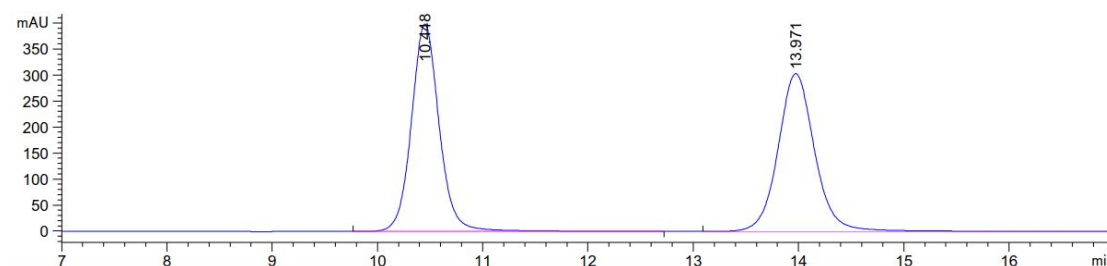

Signal 1: DAD1 A, Sig=254,4 Ref=360,100

| Peak # | RetTime [min] | Type | Width [min] | Area [mAU*s] | Height [mAU] | Area %  |
|--------|---------------|------|-------------|--------------|--------------|---------|
| 1      | 10.448        | BB   | 0.2833      | 7363.1133    | 398.92404    | 49.8553 |
| 2      | 13.971        | BB   | 0.3705      | 7405.85742   | 303.64636    | 50.1447 |

Totals : 1.47690e4 702.57040

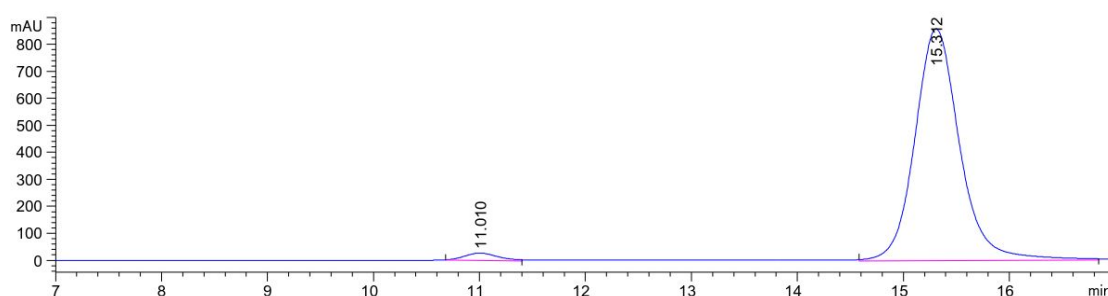

Signal 1: DAD1 A, Sig=254,4 Ref=360,100

| Peak # | RetTime [min] | Type | Width [min] | Area [mAU*s] | Height [mAU] | Area %  |
|--------|---------------|------|-------------|--------------|--------------|---------|
| 1      | 11.010        | MM   | 0.3688      | 602.62848    | 27.23625     | 2.3272  |
| 2      | 15.312        | MM   | 0.4909      | 2.52922e4    | 858.64404    | 97.6728 |

Totals : 2.58948e4 885.88029

**Figure S67. NOESY NMR (600MHz, CDCl<sub>3</sub>) spectrum of 4d**

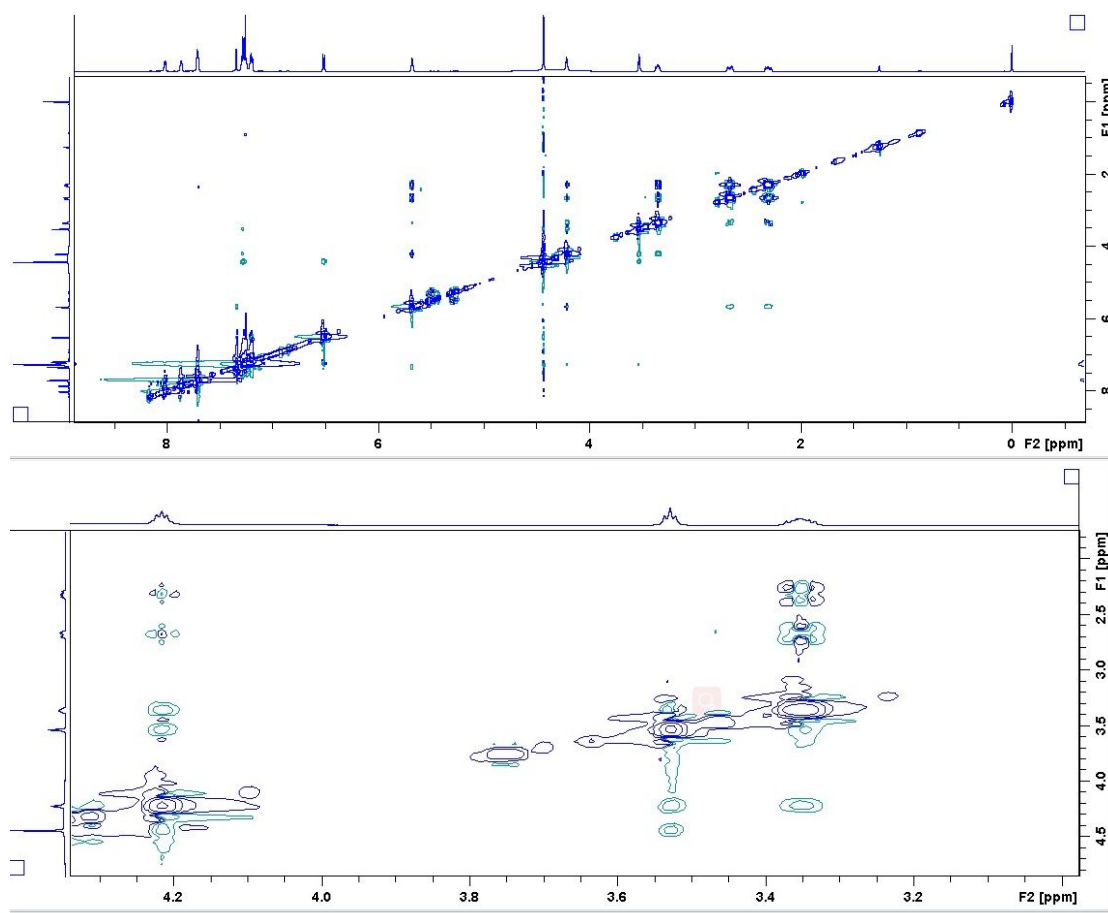

**(5a*S*,12a*S*,12b*S*)-12-benzyl-9-chloro-6,12,12a,12b-tetrahydro-5*H*-naphtho**

**[2,3-a]carbazole-5,13(5aH)-dione (4e)**

**Figure S68.  $^1\text{H}$  NMR (400MHz,  $\text{CDCl}_3$ ) spectrum of 4e**

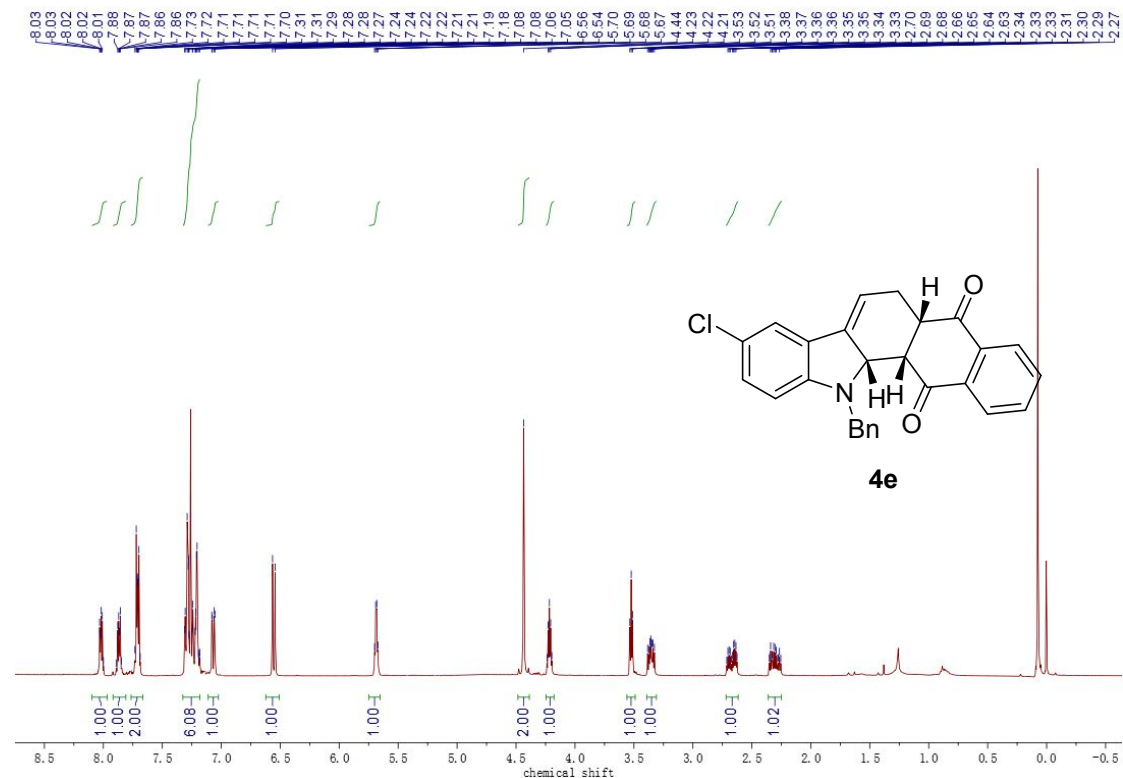

**Figure S69.  $^{13}\text{C}$  NMR (101MHz,  $\text{CDCl}_3$ ) spectrum of 4e**

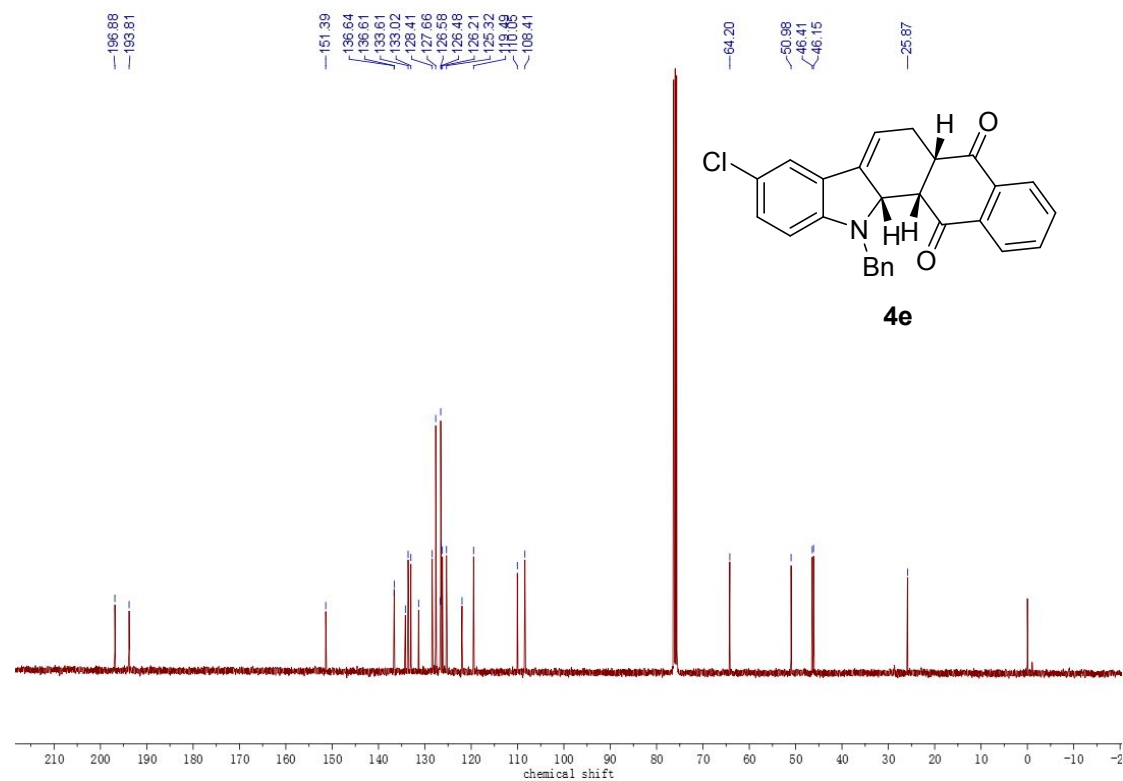

**Figure S70. HPLC spectrum of 4e**

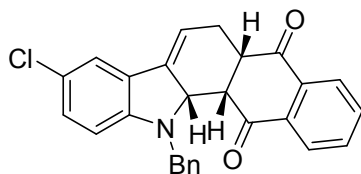

**4e** (The top one is racemic, and the bottom one is chiral)

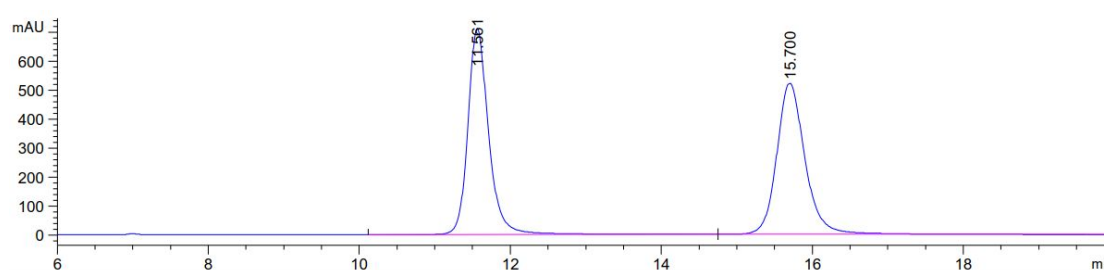

Signal 1: DAD1 A, Sig=254,4 Ref=360,100

| Peak # | RetTime [min] | Type | Width [min] | Area [mAU*s] | Height [mAU] | Area %  |
|--------|---------------|------|-------------|--------------|--------------|---------|
| 1      | 11.561        | VB R | 0.2896      | 1.36232e4    | 710.90973    | 49.9336 |
| 2      | 15.700        | BB   | 0.3979      | 1.36595e4    | 521.02631    | 50.0664 |

Totals : 2.72827e4 1231.93604

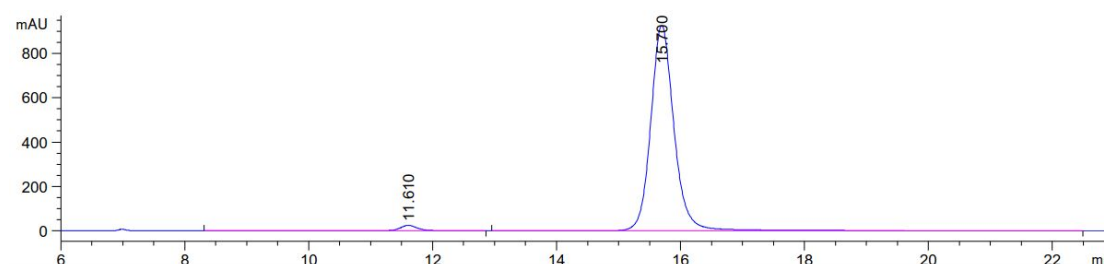

Signal 1: DAD1 A, Sig=254,4 Ref=360,100

| Peak # | RetTime [min] | Type | Width [min] | Area [mAU*s] | Height [mAU] | Area %  |
|--------|---------------|------|-------------|--------------|--------------|---------|
| 1      | 11.610        | VB R | 0.2971      | 541.36572    | 24.35772     | 2.1802  |
| 2      | 15.700        | BB   | 0.3982      | 2.42892e4    | 925.33527    | 97.8198 |

Totals : 2.48306e4 949.69299

**(5a*S*,12a*S*,12b*S*)-12-benzyl-10-bromo-6,12,12a,12b-tetrahydro-5*H*-naphth**

**o[2,3-a]carbazole-5,13(5a*H*)-dione (4f)**

**Figure S71. <sup>1</sup>H NMR (600MHz, CDCl<sub>3</sub>) spectrum of 4f**

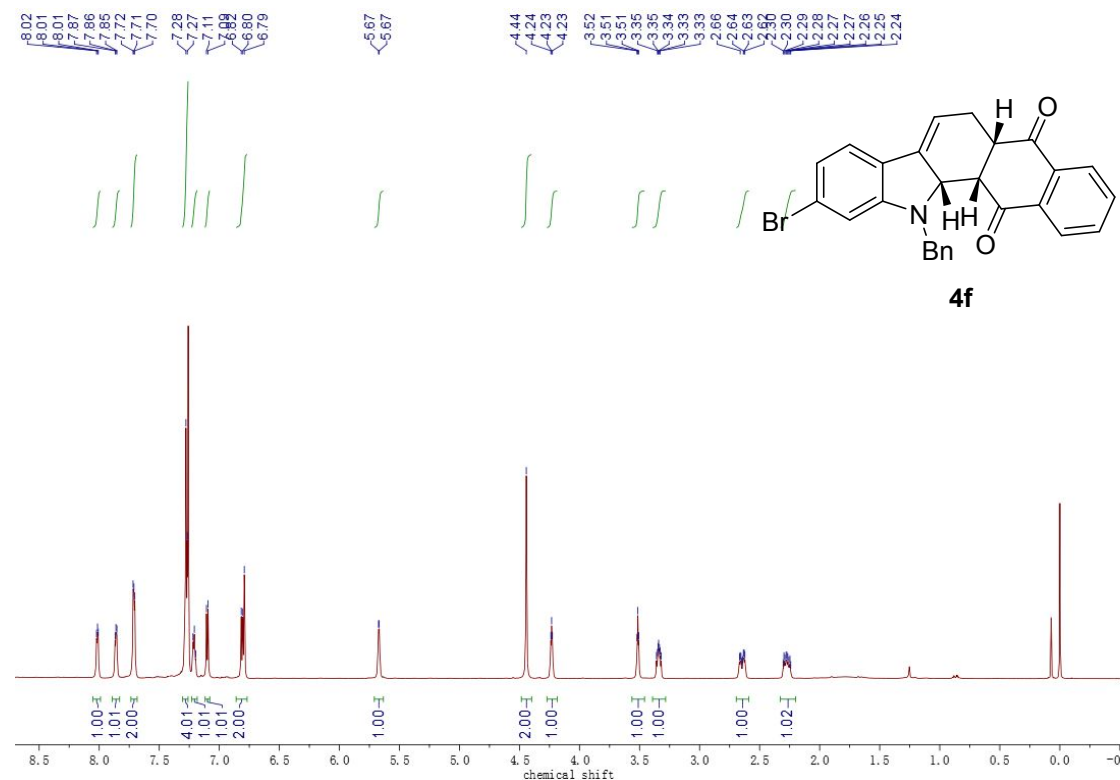

**Figure S72. <sup>13</sup>C NMR (151MHz, CDCl<sub>3</sub>) spectrum of 4f**

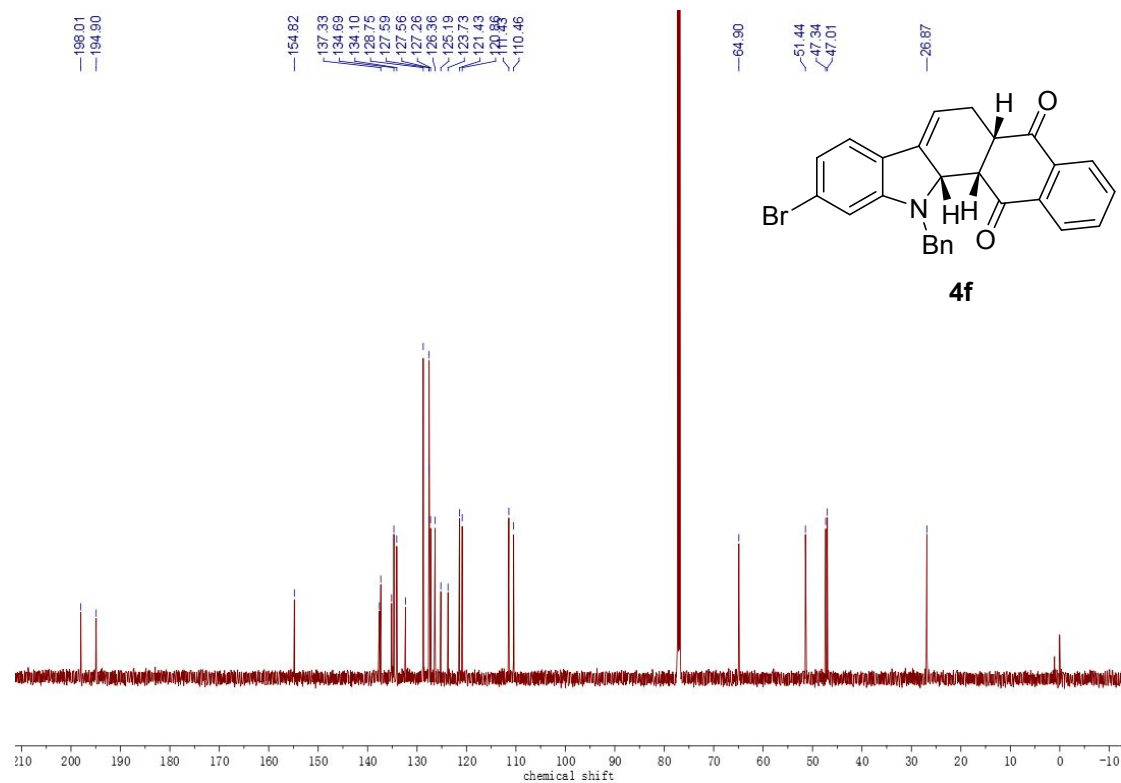

**Figure S73. HPLC spectrum of 4f**

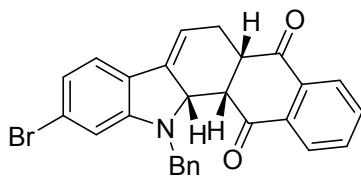

**4f** (The top one is racemic, and the bottom one is chiral)

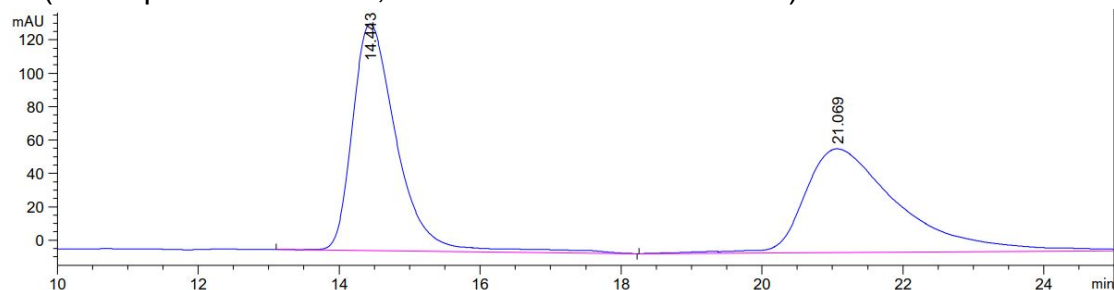

Signal 1: DAD1 A, Sig=254,4 Ref=off

| Peak # | RetTime [min] | Type | Width [min] | Area [mAU*s] | Height [mAU] | Area %  |
|--------|---------------|------|-------------|--------------|--------------|---------|
| 1      | 14.443        | VV R | 0.6657      | 5958.07080   | 135.87486    | 50.4273 |
| 2      | 21.069        | BB   | 1.3909      | 5857.10205   | 62.18026     | 49.5727 |

Totals : 1.18152e4 198.05512

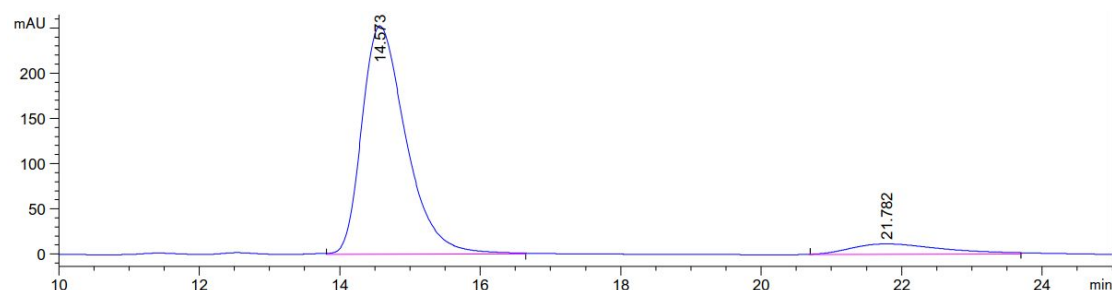

Signal 1: DAD1 A, Sig=254,4 Ref=360,100

| Peak # | RetTime [min] | Type | Width [min] | Area [mAU*s] | Height [mAU] | Area %  |
|--------|---------------|------|-------------|--------------|--------------|---------|
| 1      | 14.573        | MM   | 0.7275      | 1.10375e4    | 252.85777    | 94.9152 |
| 2      | 21.782        | MM   | 1.0906      | 591.29822    | 9.03622      | 5.0848  |

Totals : 1.16288e4 261.89399

**(5a*S*,12a*S*,12b*S*)-12-benzyl-10-fluoro-6,12,12a,12b-tetrahydro-5*H*-naphth**



**o[2,3-a]carbazole-5,13(5a*H*)-dione (4g)**

**Figure S74. <sup>1</sup>H NMR (600MHz, CDCl<sub>3</sub>) spectrum of 4g**

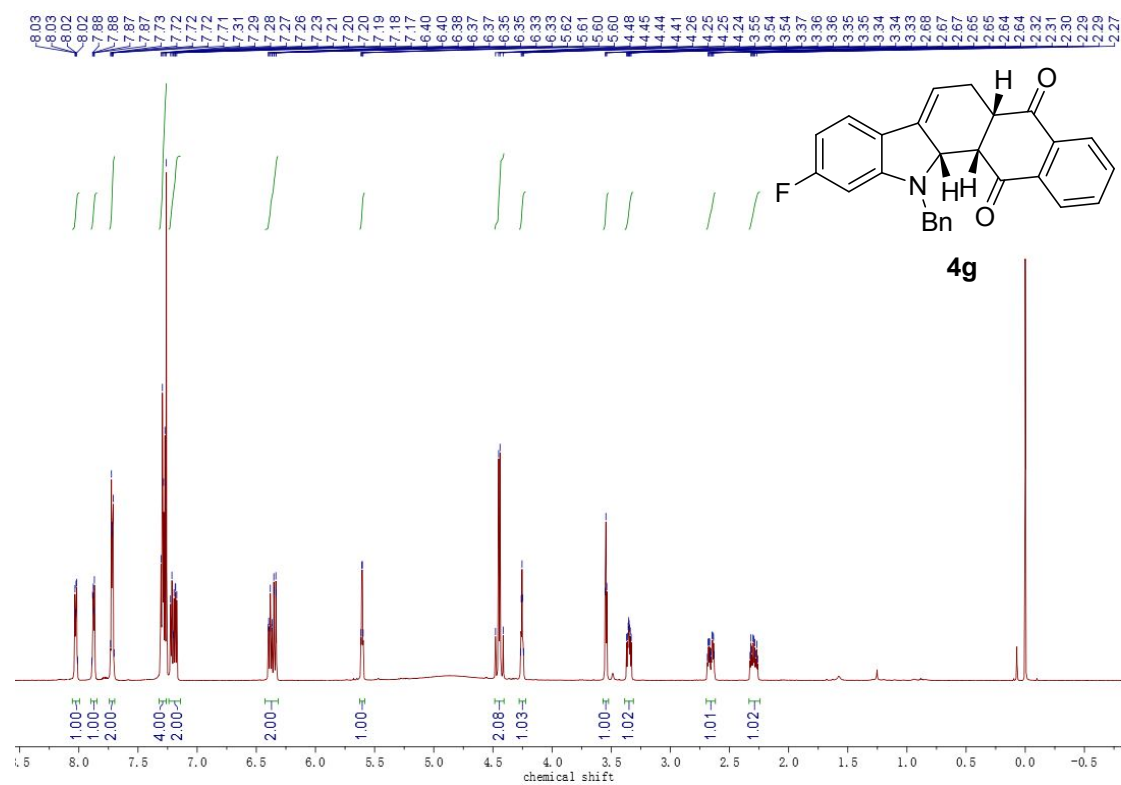

**Figure S75. <sup>13</sup>C NMR (151MHz, CDCl<sub>3</sub>) spectrum of 4g**

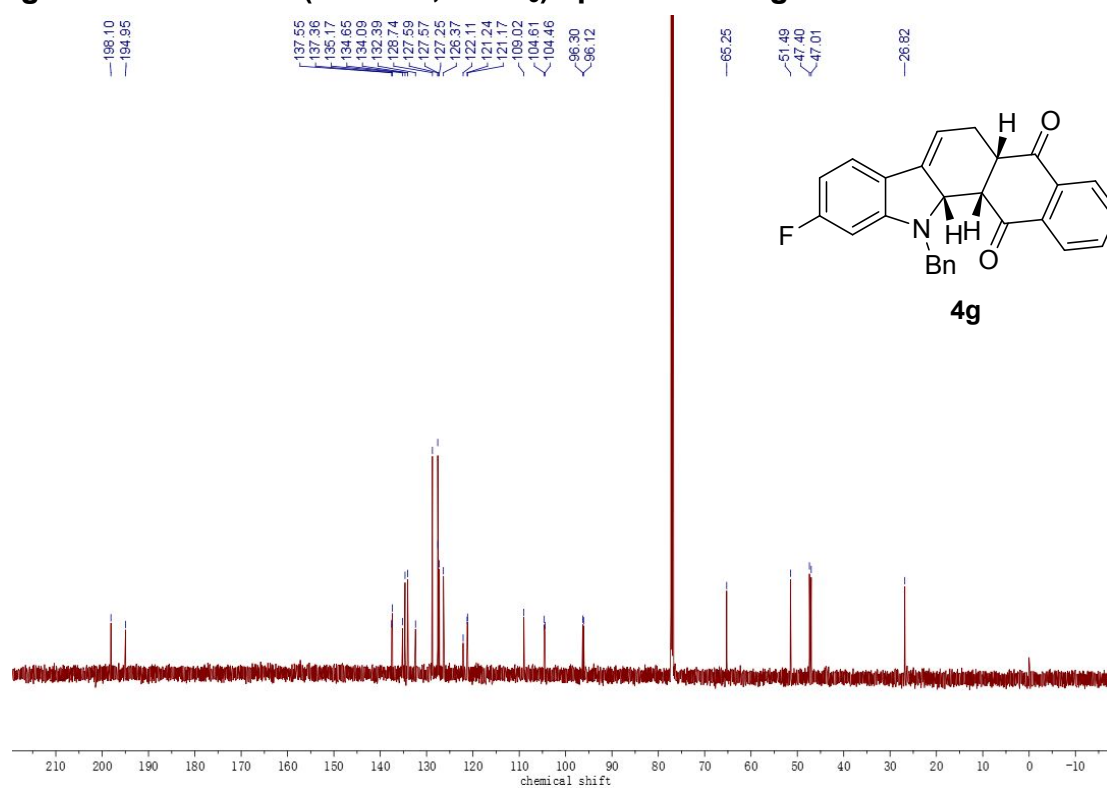

**Figure S76. HPLC spectrum of 4g**

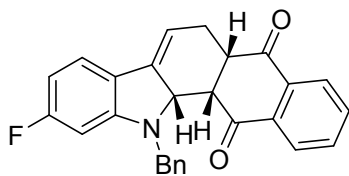

**4g** (The top one is racemic, and the bottom one is chiral)

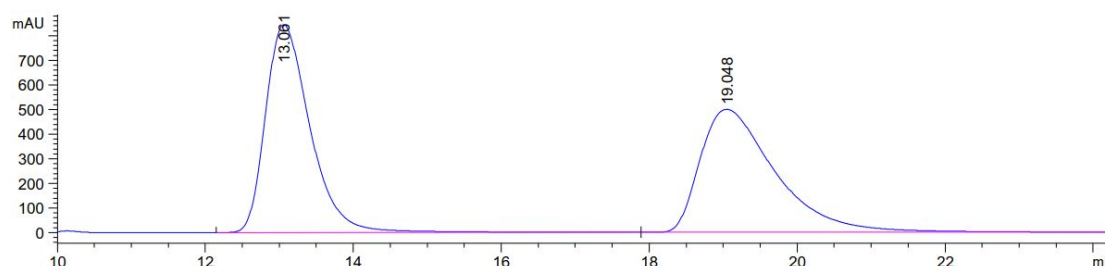

Signal 1: DAD1 A, Sig=254,4 Ref=off

| Peak # | RetTime [min] | Type | Width [min] | Area [mAU*s] | Height [mAU] | Area %  |
|--------|---------------|------|-------------|--------------|--------------|---------|
| 1      | 13.061        | BB   | 0.6443      | 3.53337e4    | 844.13593    | 50.0221 |
| 2      | 19.048        | BBA  | 1.0727      | 3.53025e4    | 499.41620    | 49.9779 |

Totals : 7.06363e4 1343.55212

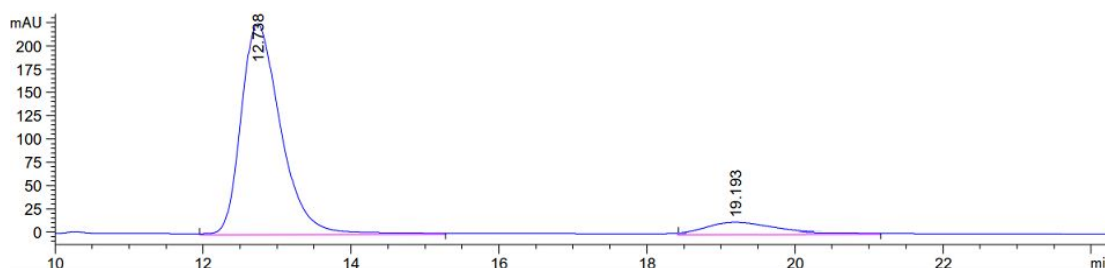

Signal 1: DAD1 A, Sig=254,4 Ref=360,100

| Peak # | RetTime [min] | Type | Width [min] | Area [mAU*s] | Height [mAU] | Area %  |
|--------|---------------|------|-------------|--------------|--------------|---------|
| 1      | 12.738        | MM   | 0.6232      | 8451.62891   | 226.03871    | 92.6269 |
| 2      | 19.193        | MM   | 0.9740      | 672.75415    | 11.51143     | 7.3731  |

Totals : 9124.38306 237.55014

**(5a*S*,12a*S*,12b*S*)-12-benzyl-9-methyl-6,12,12a,12b-tetrahydro-5*H*-naphtho**



**[2,3-a]carbazole-5,13(5aH)-dione (4h)**

**Figure S77.  $^1\text{H}$  NMR (600MHz,  $\text{CDCl}_3$ ) spectrum of 4h**

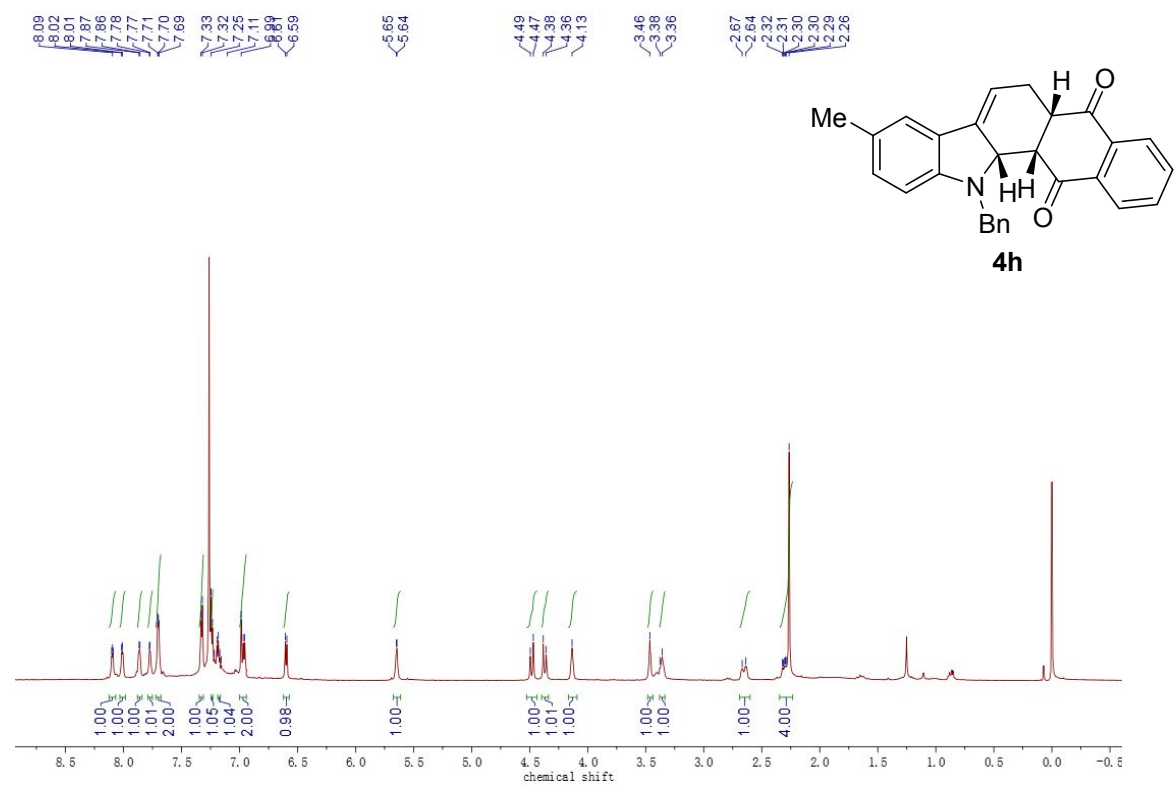

**Figure S78.  $^{13}\text{C}$  NMR (151MHz,  $\text{CDCl}_3$ ) spectrum of 4h**

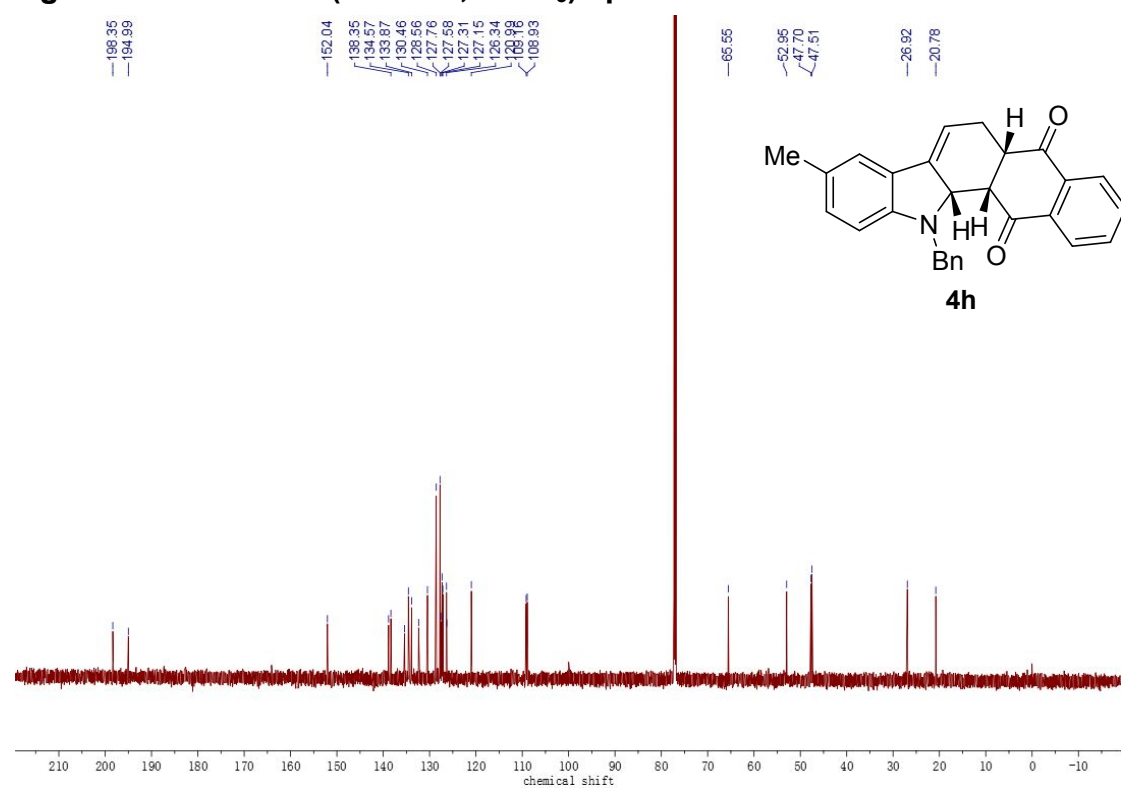

**Figure S79. HPLC spectrum of 4h**

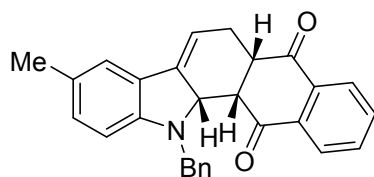

**4h** (The top one is racemic, and the bottom one is chiral)

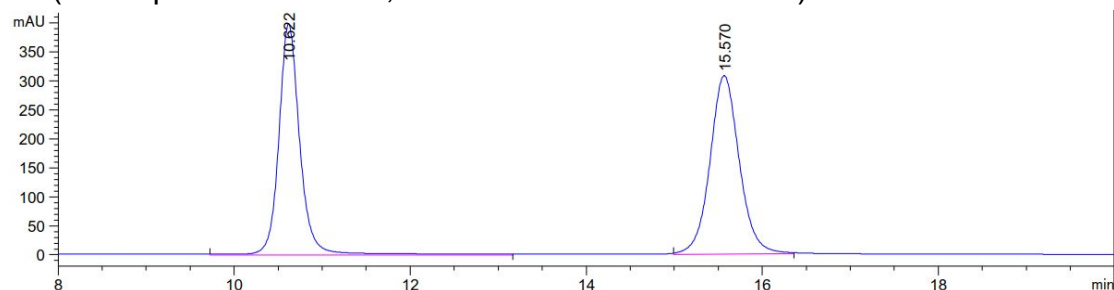

Signal 1: DAD1 A, Sig=254,4 Ref=360,100

| Peak # | RetTime [min] | Type | Width [min] | Area [mAU*s] | Height [mAU] | Area %  |
|--------|---------------|------|-------------|--------------|--------------|---------|
| 1      | 10.622        | MM   | 0.2845      | 6812.86133   | 399.06091    | 48.8400 |
| 2      | 15.570        | MM   | 0.3860      | 7136.49805   | 308.16812    | 51.1600 |

Totals : 1.39494e4 707.22903

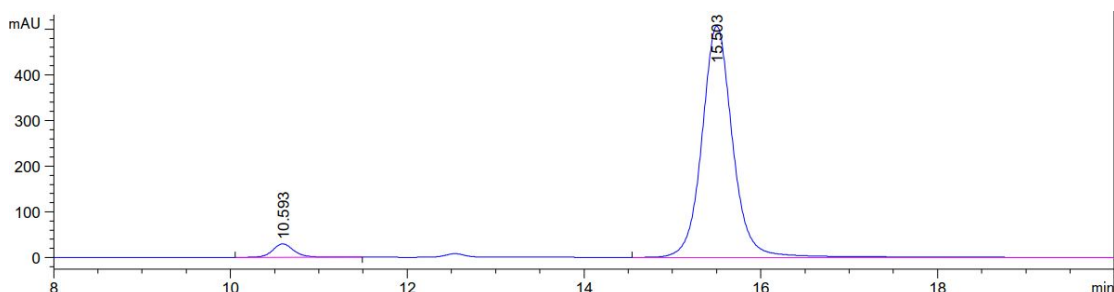

Signal 1: DAD1 A, Sig=254,4 Ref=360,100

| Peak # | RetTime [min] | Type | Width [min] | Area [mAU*s] | Height [mAU] | Area %  |
|--------|---------------|------|-------------|--------------|--------------|---------|
| 1      | 10.593        | BB   | 0.2563      | 493.92798    | 29.36253     | 3.8812  |
| 2      | 15.503        | VBA  | 0.3658      | 1.22321e4    | 506.34439    | 96.1188 |

Totals : 1.27261e4 535.70692

**(5a*S*,12a*S*,12b*S*)-12-benzyl-9-methoxy-6,12,12a,12b-tetrahydro-5*H*-naphtho**

ho[2,3-a]carbazole-5,13(5aH)-dione (4i)

Figure S80. <sup>1</sup>H NMR (600MHz, CDCl<sub>3</sub>) spectrum of 4i

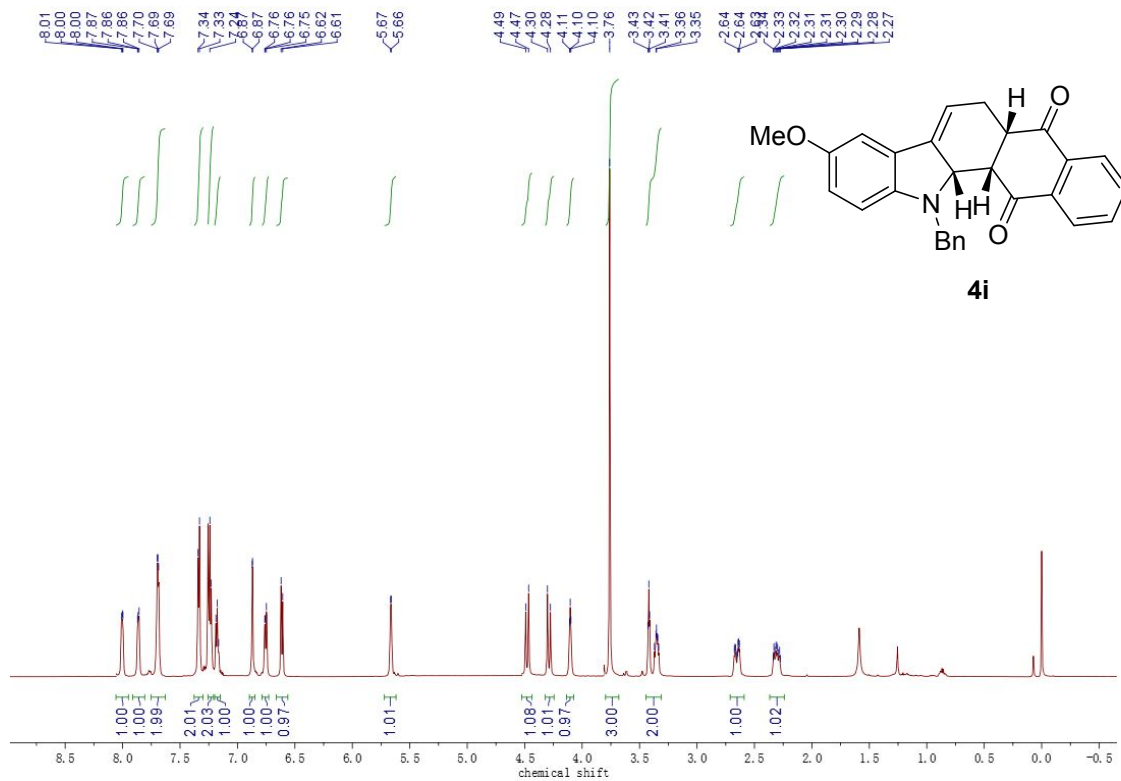

Figure S81. <sup>13</sup>C NMR (151MHz, CDCl<sub>3</sub>) spectrum of 4i

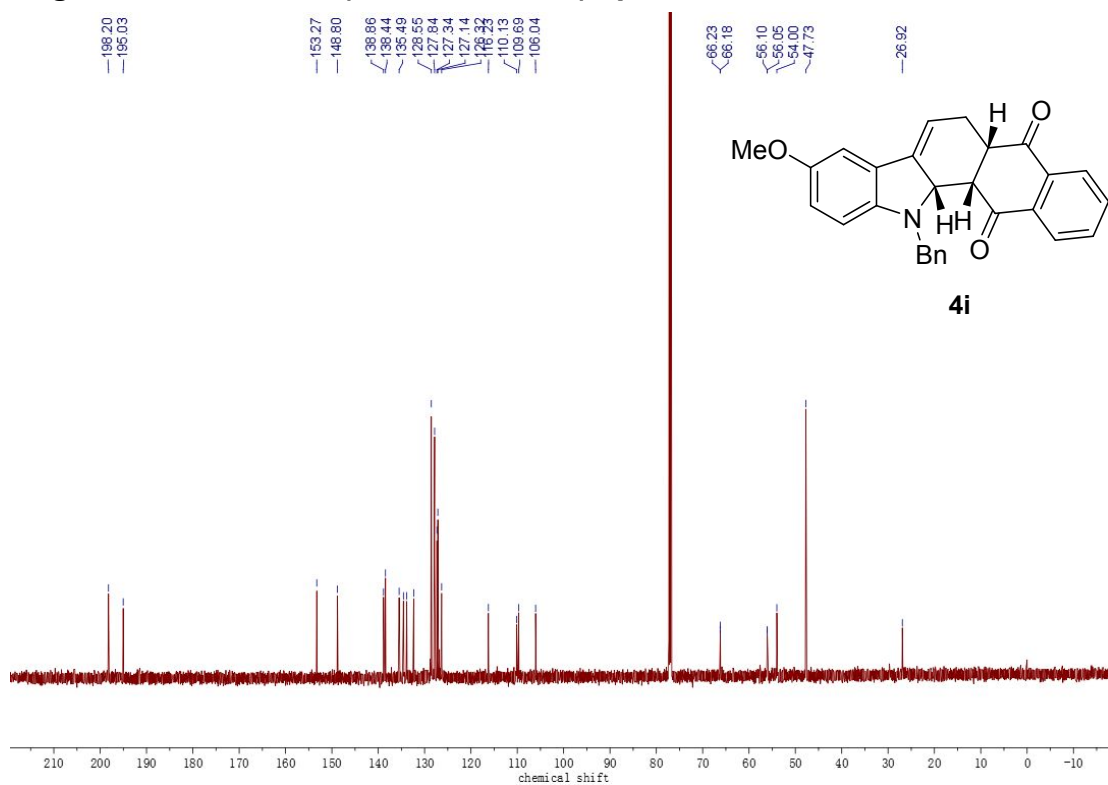

Figure S82. HPLC spectrum of 4i

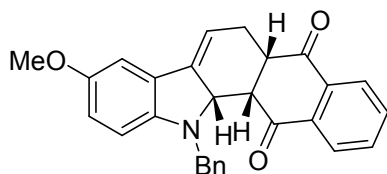

**4i** (The top one is racemic, and the bottom one is chiral)

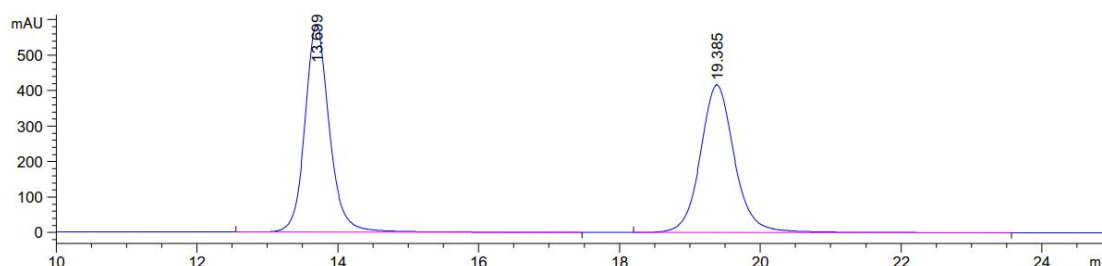

Signal 1: DAD1 A, Sig=254,4 Ref=360,100

| Peak # | RetTime [min] | Type | Width [min] | Area [mAU*s] | Height [mAU] | Area %  |
|--------|---------------|------|-------------|--------------|--------------|---------|
| 1      | 13.699        | BB   | 0.3661      | 1.41247e4    | 584.19623    | 50.1368 |
| 2      | 19.385        | BB   | 0.5138      | 1.40476e4    | 416.22028    | 49.8632 |

Totals : 2.81722e4 1000.41650

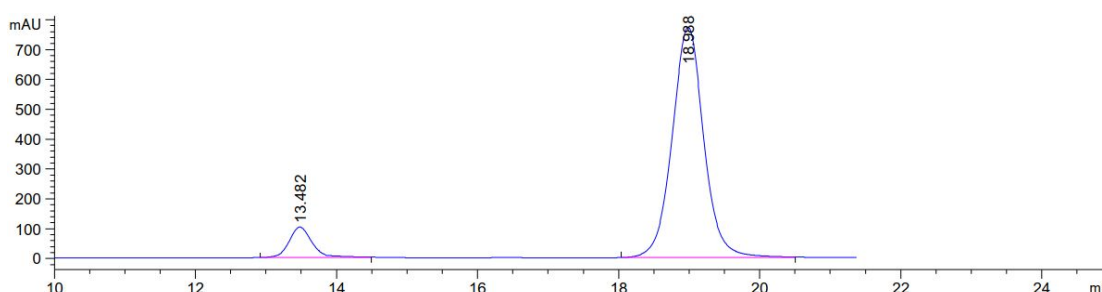

Signal 1: DAD1 A, Sig=254,4 Ref=off

| Peak # | RetTime [min] | Type | Width [min] | Area [mAU*s] | Height [mAU] | Area %  |
|--------|---------------|------|-------------|--------------|--------------|---------|
| 1      | 13.482        | MM   | 0.3396      | 2000.60400   | 98.17230     | 7.6662  |
| 2      | 18.988        | MM   | 0.5202      | 2.40957e4    | 772.01215    | 92.3338 |

Totals : 2.60963e4 870.18445

**(5a*S*,12a*S*,12b*S*)-12-benzyl-10-methoxy-6,12,12a,12b-tetrahydro-5*H*-naph**

tho[2,3-*a*]carbazole-5,13(5*aH*)-dione (**4j**)

Figure S83. <sup>1</sup>H NMR (600MHz, CDCl<sub>3</sub>) spectrum of **4j**

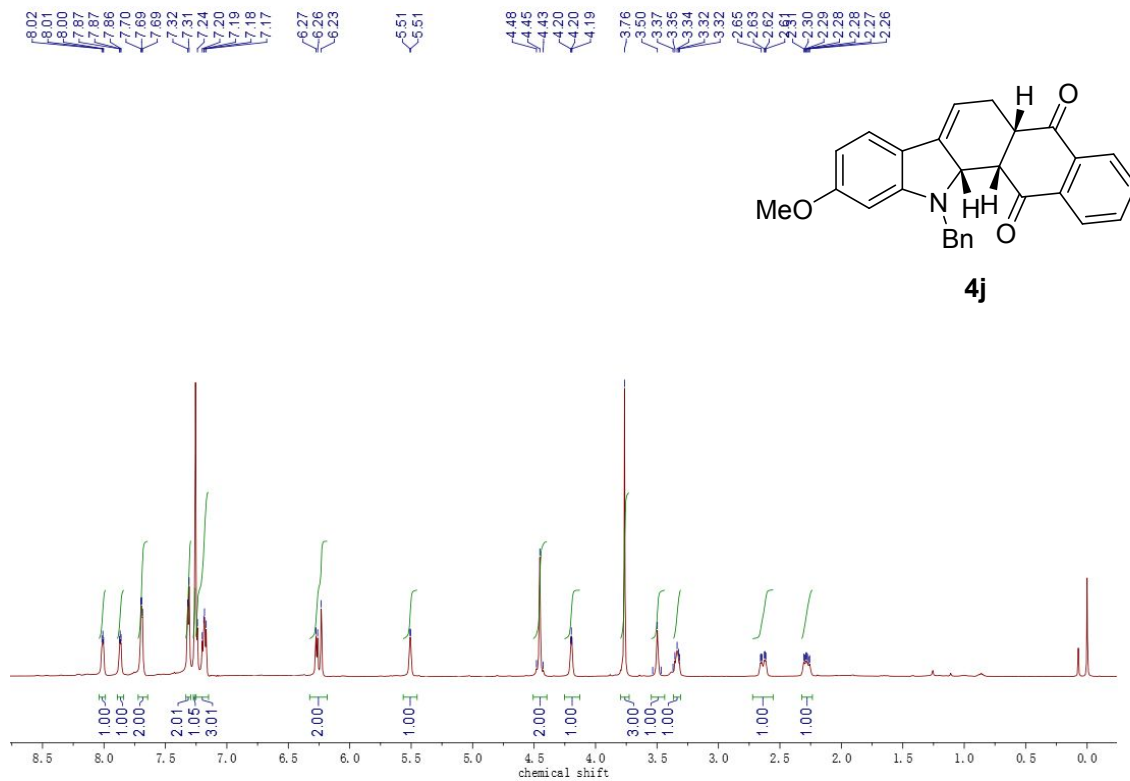

Figure S84. <sup>13</sup>C NMR (151MHz, CDCl<sub>3</sub>) spectrum of **4j**

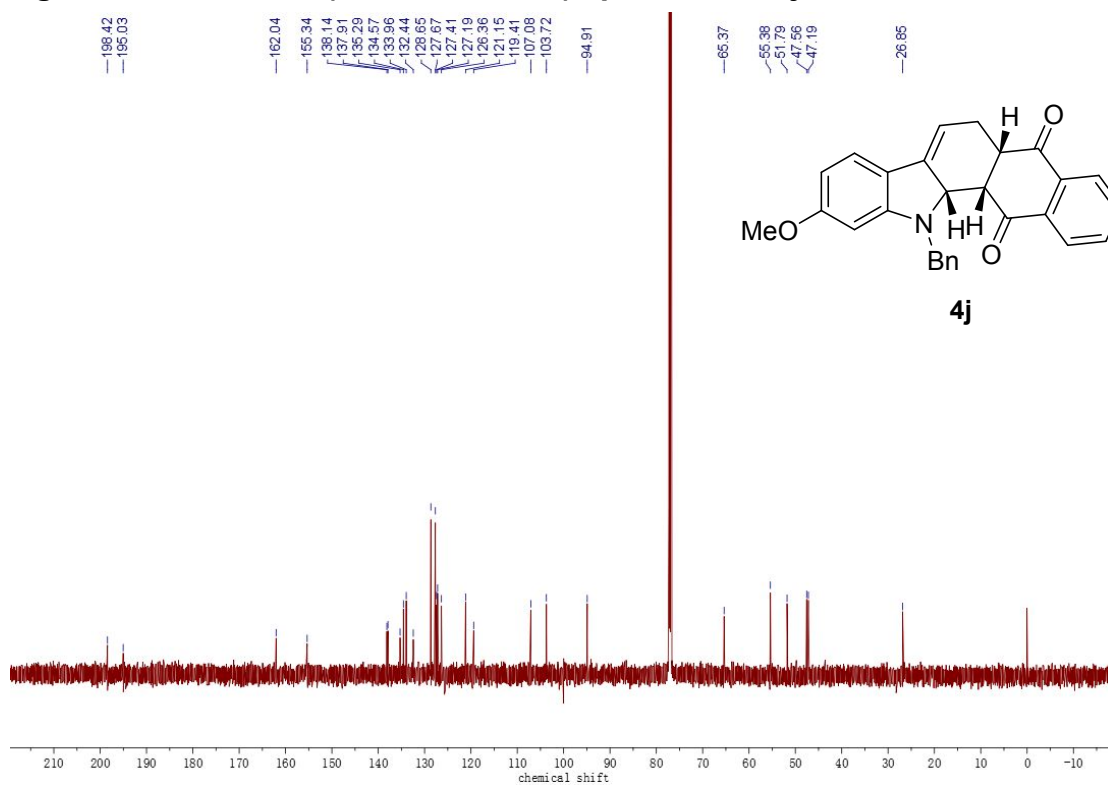

Figure S85. HPLC spectrum of **4j**

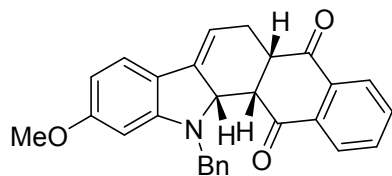

**4j** (The top one is racemic, and the bottom one is chiral)

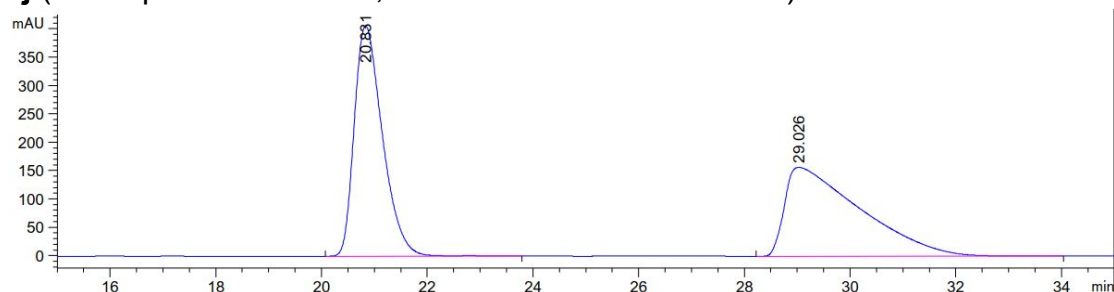

Signal 1: DAD1 A, Sig=254,4 Ref=off

| Peak # | RetTime [min] | Type | Width [min] | Area [mAU*s] | Height [mAU] | Area %  |
|--------|---------------|------|-------------|--------------|--------------|---------|
| 1      | 20.831        | BV R | 0.5674      | 1.50683e4    | 406.31296    | 49.2364 |
| 2      | 29.026        | BB   | 1.4313      | 1.55356e4    | 156.88506    | 50.7636 |

Totals : 3.06039e4 563.19801

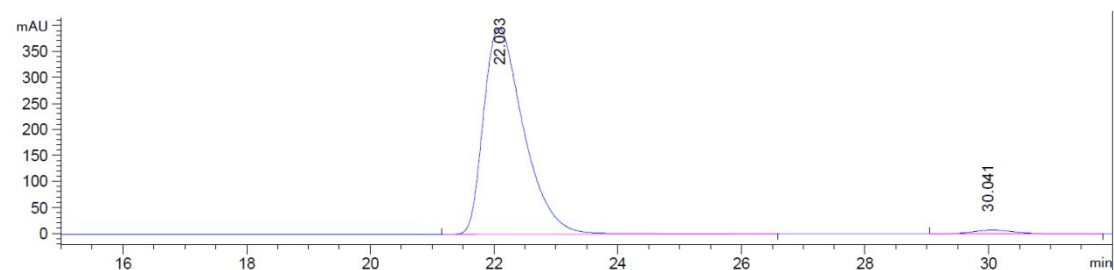

Signal 1: DAD1 A, Sig=254,4 Ref=360,100

| Peak # | RetTime [min] | Type | Width [min] | Area [mAU*s] | Height [mAU] | Area %  |
|--------|---------------|------|-------------|--------------|--------------|---------|
| 1      | 22.083        | BB   | 0.6882      | 1.78336e4    | 396.94116    | 97.9382 |
| 2      | 30.041        | BB   | 0.7717      | 375.43158    | 7.50355      | 2.0618  |

Totals : 1.82091e4 404.44471

**(5a*S*,12a*S*,12b*S*)-12-benzyl-11-methyl-6,12,12a,12b-tetrahydro-5*H*-naphth**



**o[2,3-*a*]carbazole-5,13(5*aH*)-dione (4k)**

**Figure S86. <sup>1</sup>H NMR (600MHz, CDCl<sub>3</sub>) spectrum of 4k**

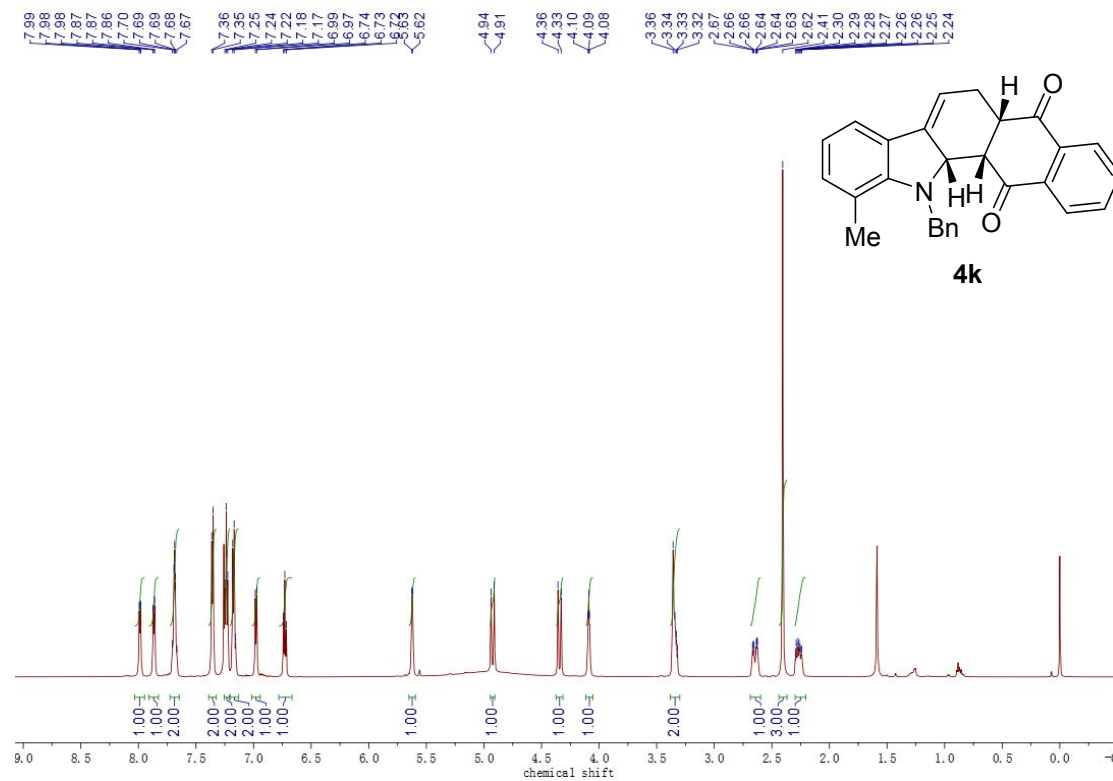

**Figure S87. <sup>13</sup>C NMR (151MHz, CDCl<sub>3</sub>) spectrum of 4k**

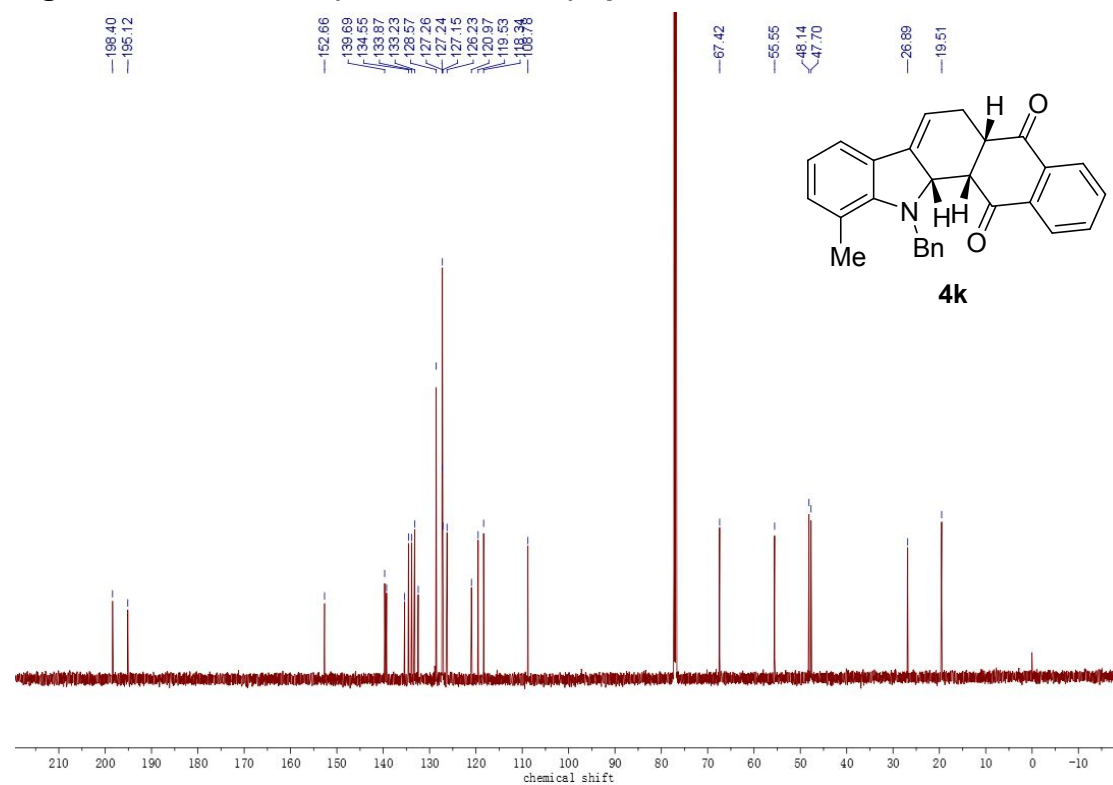

**Figure S88. HPLC spectrum of 4k**

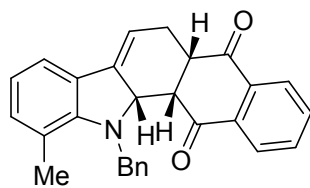

**4k** (The top one is racemic, and the bottom one is chiral)

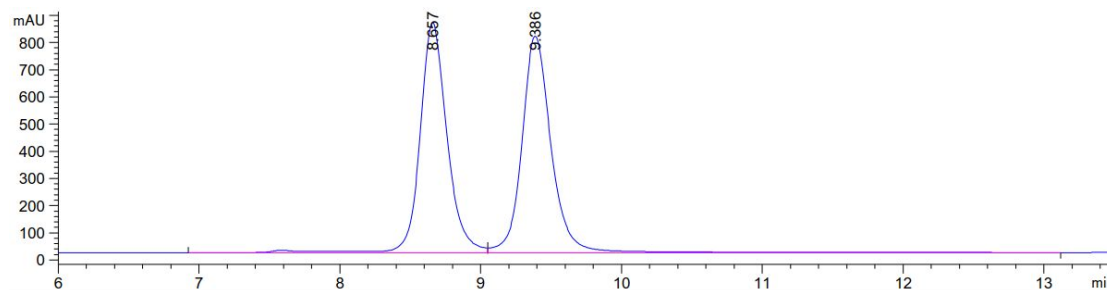

Signal 1: DAD1 A, Sig=254,4 Ref=360,100

| Peak # | RetTime [min] | Type | Width [min] | Area [mAU*s] | Height [mAU] | Area %  |
|--------|---------------|------|-------------|--------------|--------------|---------|
| 1      | 8.657         | VV R | 0.1997      | 1.13524e4    | 845.34369    | 49.5303 |
| 2      | 9.386         | VB   | 0.2194      | 1.15677e4    | 796.47290    | 50.4697 |

Totals : 2.29201e4 1641.81659

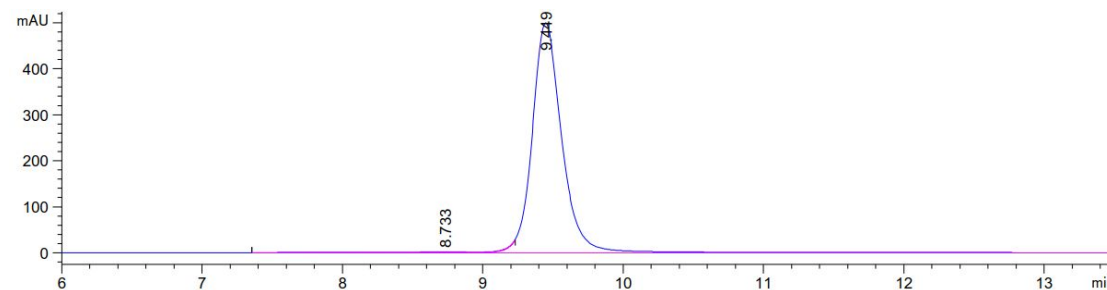

Signal 1: DAD1 A, Sig=254,4 Ref=360,100

| Peak # | RetTime [min] | Type | Width [min] | Area [mAU*s] | Height [mAU] | Area %  |
|--------|---------------|------|-------------|--------------|--------------|---------|
| 1      | 8.733         | BV E | 0.7853      | 112.09278    | 1.77371      | 1.5031  |
| 2      | 9.449         | VB R | 0.2217      | 7345.20850   | 499.02661    | 98.4969 |

Totals : 7457.30128 500.80032

**(5a*S*,12a*S*,12b*S*)-12-benzyl-7-methyl-6,12,12a,12b-tetrahydro-5*H*-naphtho**



**[2,3-*a*]carbazole-5,13(5*aH*)-dione (4I)**  
**Figure S89. <sup>1</sup>H NMR (600MHz, CDCl<sub>3</sub>) spectrum of 4I**

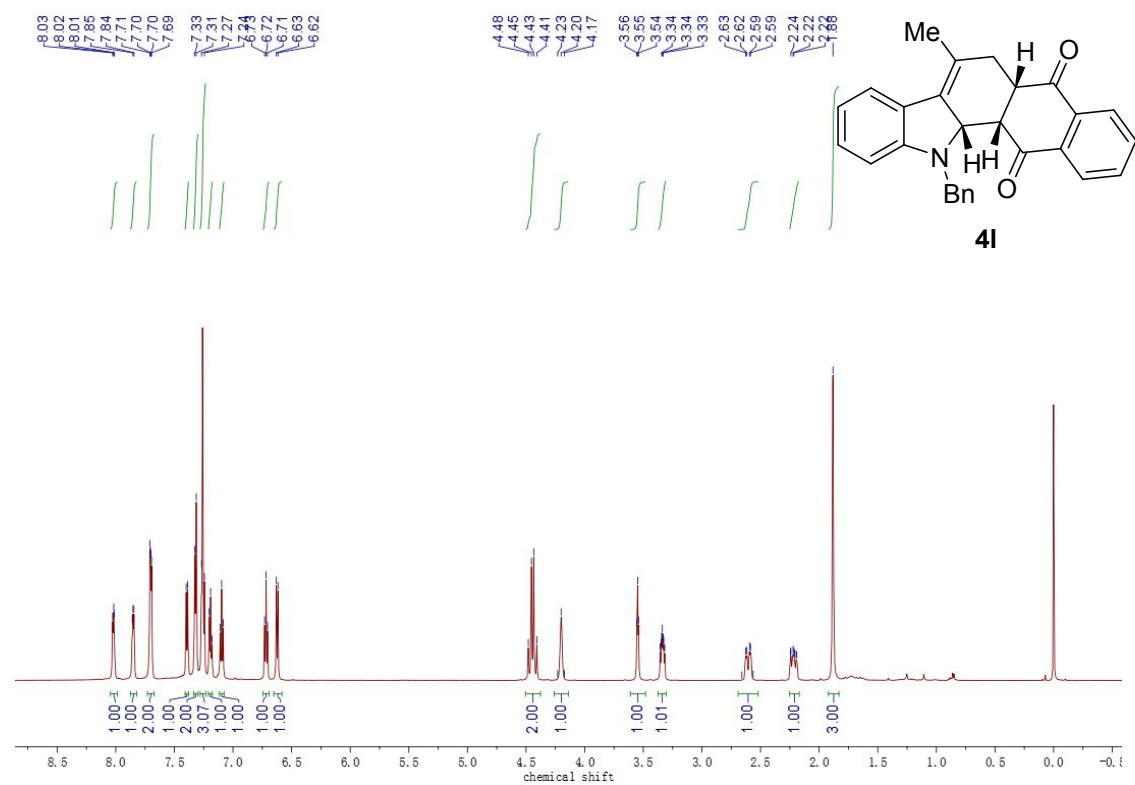

**Figure S90. <sup>13</sup>C NMR (151MHz, CDCl<sub>3</sub>) spectrum of 4I**

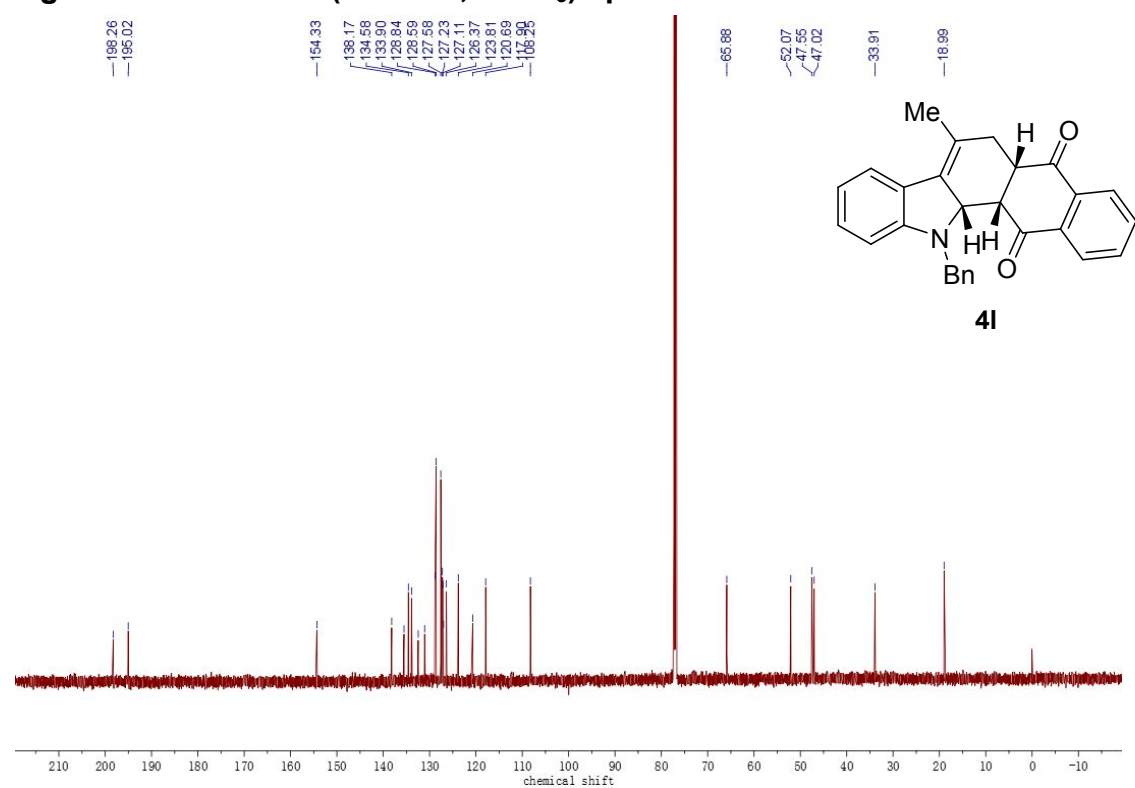

**Figure S91. HPLC spectrum of 4I**

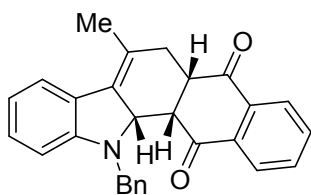

**4I** (The top one is racemic, and the bottom one is chiral)

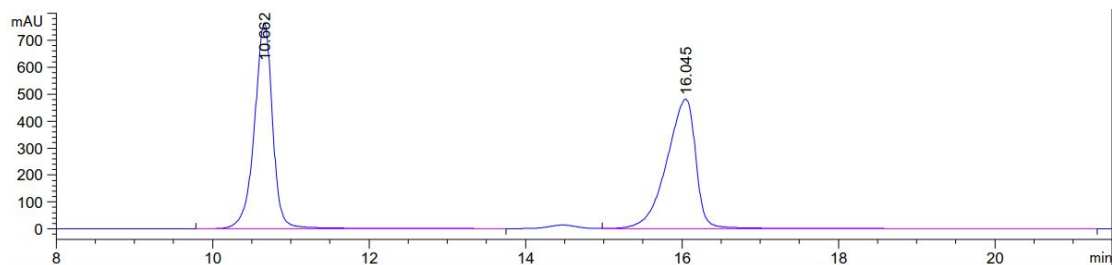

Signal 1: DAD1 A, Sig=254,4 Ref=360,100

| Peak # | RetTime [min] | Type | Width [min] | Area [mAU*s] | Height [mAU] | Area %  |
|--------|---------------|------|-------------|--------------|--------------|---------|
| 1      | 10.662        | BV R | 0.2457      | 1.24332e4    | 764.22131    | 49.6393 |
| 2      | 16.045        | VV R | 0.4014      | 1.26139e4    | 481.14987    | 50.3607 |

Totals : 2.50471e4 1245.37119

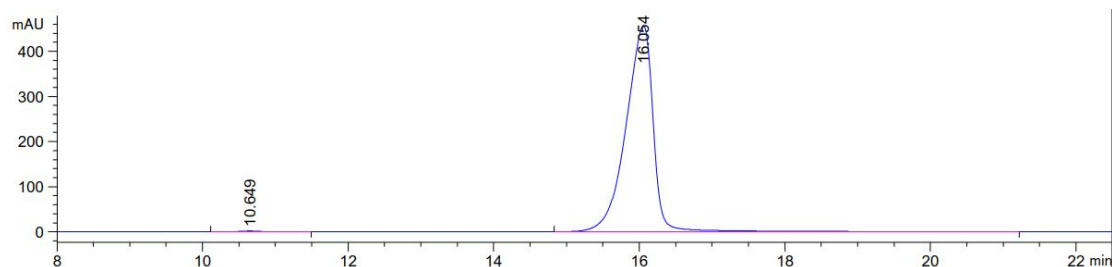

Signal 1: DAD1 A, Sig=254,4 Ref=360,100

| Peak # | RetTime [min] | Type | Width [min] | Area [mAU*s] | Height [mAU] | Area %  |
|--------|---------------|------|-------------|--------------|--------------|---------|
| 1      | 10.649        | BB   | 0.2534      | 28.65150     | 1.71062      | 0.2381  |
| 2      | 16.054        | BV R | 0.4026      | 1.20055e4    | 456.49075    | 99.7619 |

Totals : 1.20342e4 458.20138

**(5a*S*,12a*S*,12b*S*)-12-benzyl-6-methyl-6,12,12a,12b-tetrahydro-5*H*-naphtho**

**[2,3-a]carbazole-5,13(5aH)-dione (3am)**

**Figure S92.  $^1\text{H}$  NMR (600MHz,  $\text{CDCl}_3$ ) spectrum of 3am**

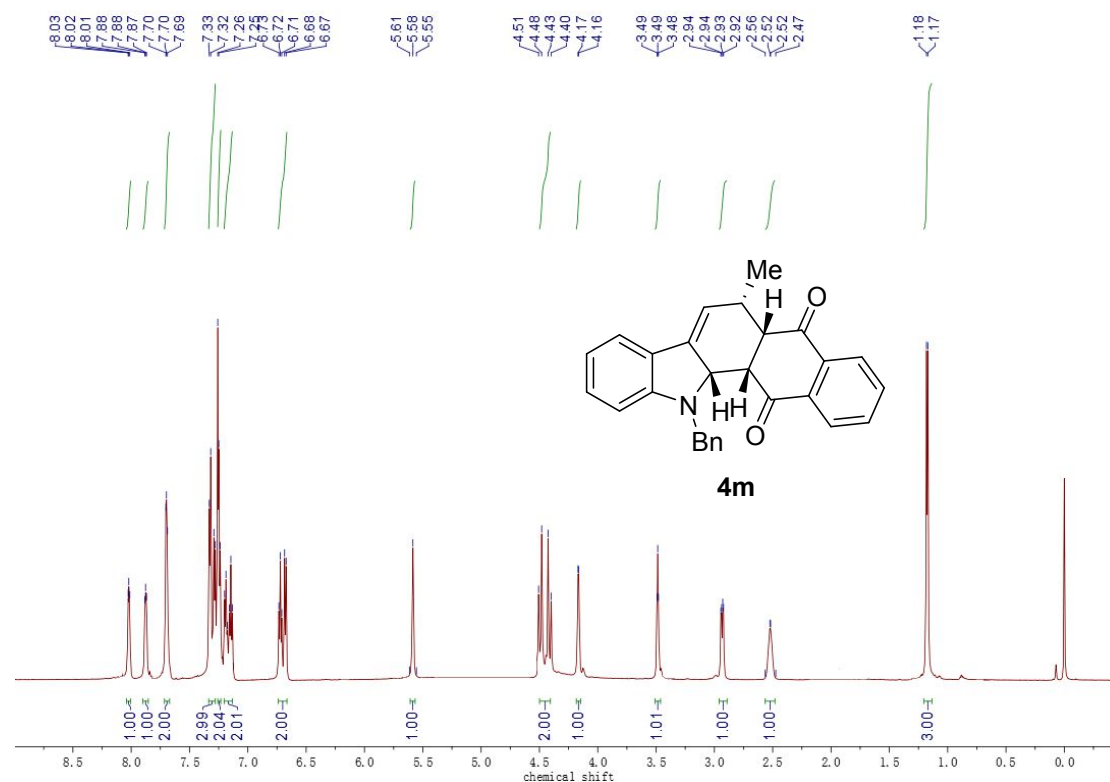

**Figure S93.  $^{13}\text{C}$  NMR (151MHz,  $\text{CDCl}_3$ ) spectrum of 4m**

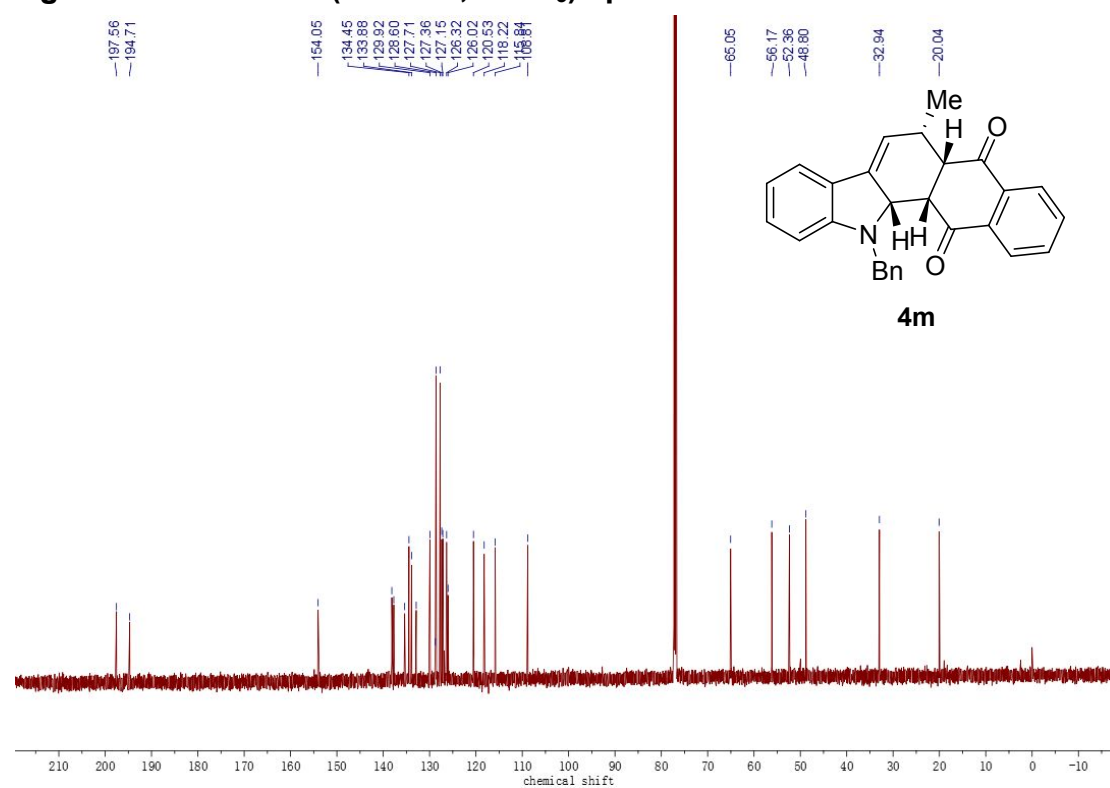

**Figure S94. HPLC spectrum of 4m**

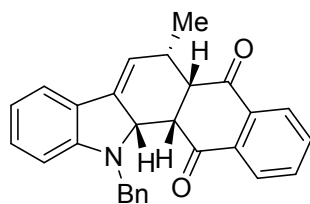

**4m** (The top one is racemic, and the bottom one is chiral)

mV

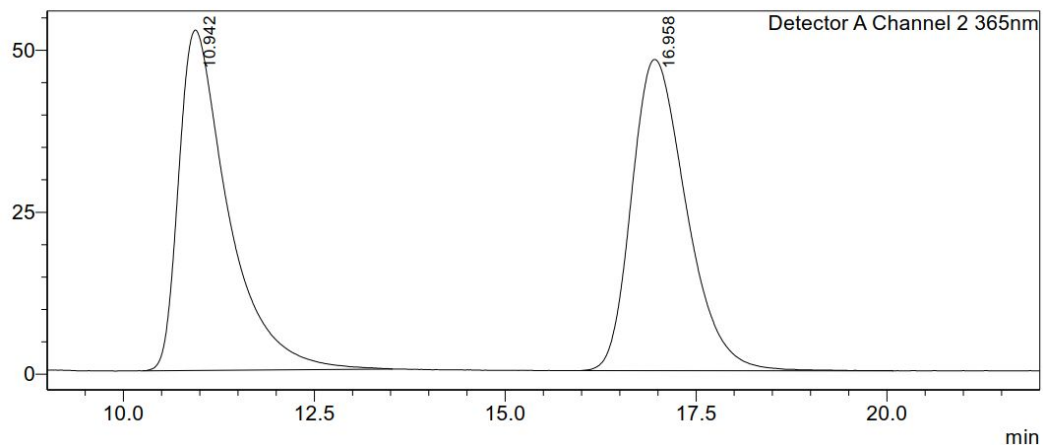

Detector A Channel 2 365nm

| Peak  | Ret. Time | Area    | Height | Area%   | Conc.  |
|-------|-----------|---------|--------|---------|--------|
| 1     | 10.942    | 2364876 | 52549  | 49.655  | 49.655 |
| 2     | 16.958    | 2397699 | 48054  | 50.345  | 50.345 |
| Total |           | 4762576 | 100604 | 100.000 |        |

mV

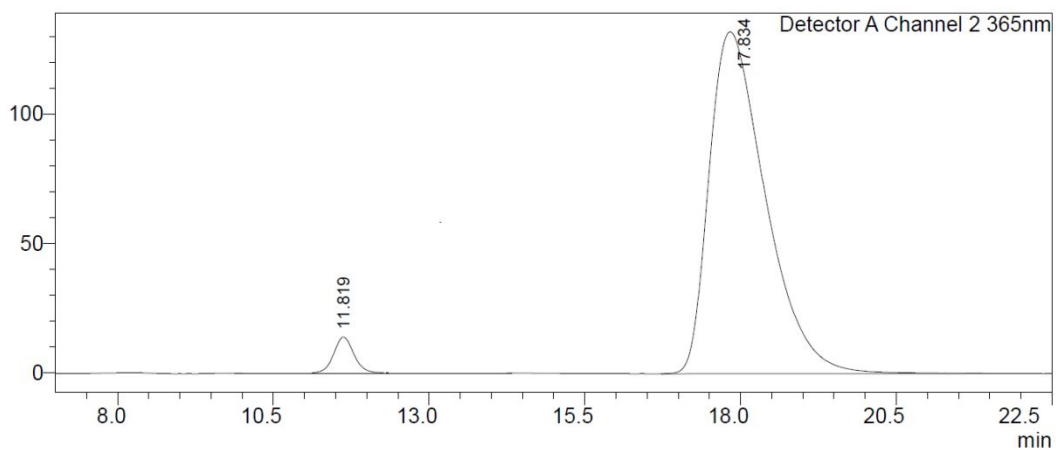

Detector A Channel 2 365nm

| Peak  | Ret. Time | Area    | Height | Area%   | Conc.  |
|-------|-----------|---------|--------|---------|--------|
| 1     | 11.816    | 741878  | 26012  | 8.186   | 8.186  |
| 2     | 17.834    | 8320937 | 131985 | 91.814  | 91.814 |
| Total |           | 9062815 | 157997 | 100.000 |        |

**Figure S95. NOESY NMR (600MHz, CDCl<sub>3</sub>) spectrum of 4m**

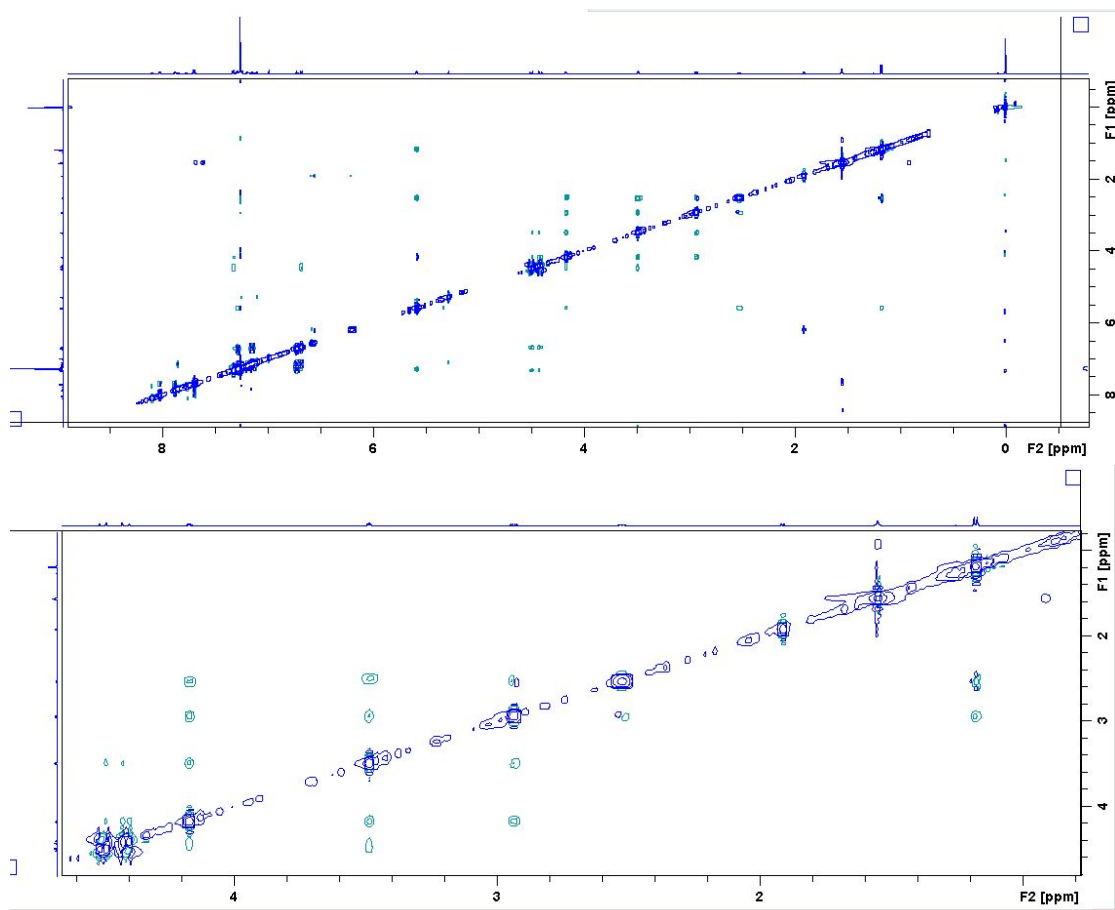

**(5a*S*,12a*S*,12b*S*)-6,12,12a,12b-tetrahydro-5*H*-naphtho[2,3-*a*]carbazole-5,1**

**3(5a*H*)-dione (4n)**

**Figure S96. <sup>1</sup>H NMR (600MHz, CDCl<sub>3</sub>) spectrum of 4n**

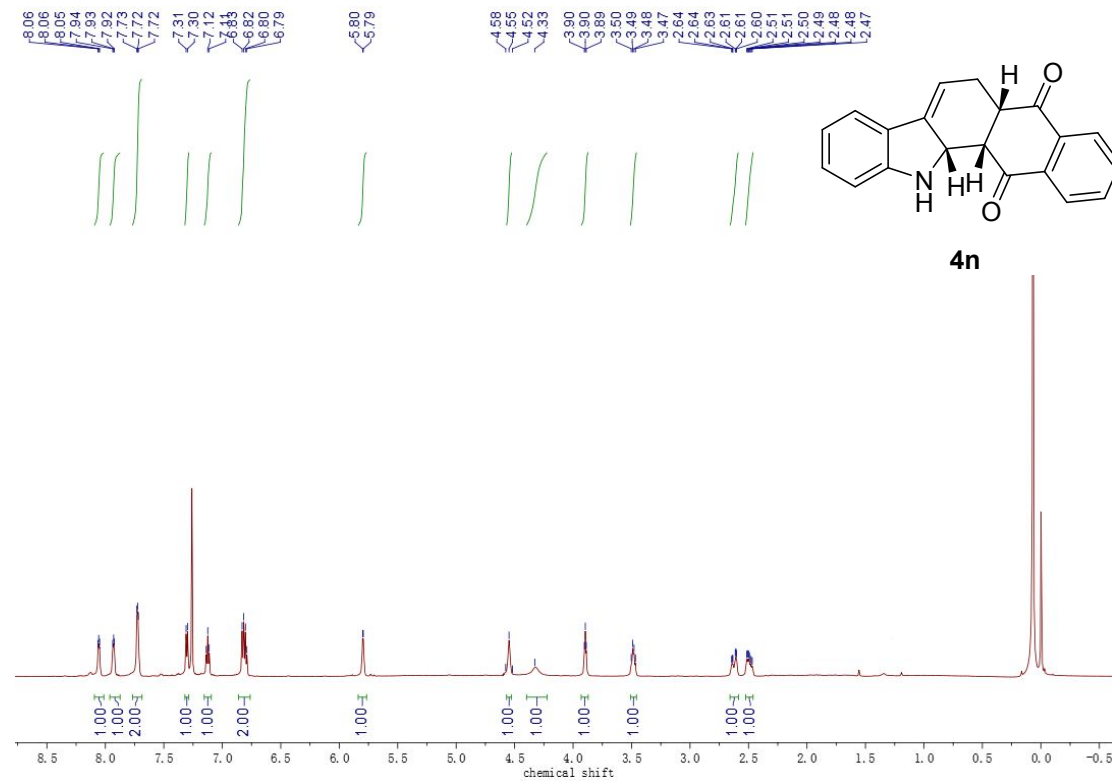

**Figure S97. <sup>13</sup>C NMR (151MHz, CDCl<sub>3</sub>) spectrum of 4n**

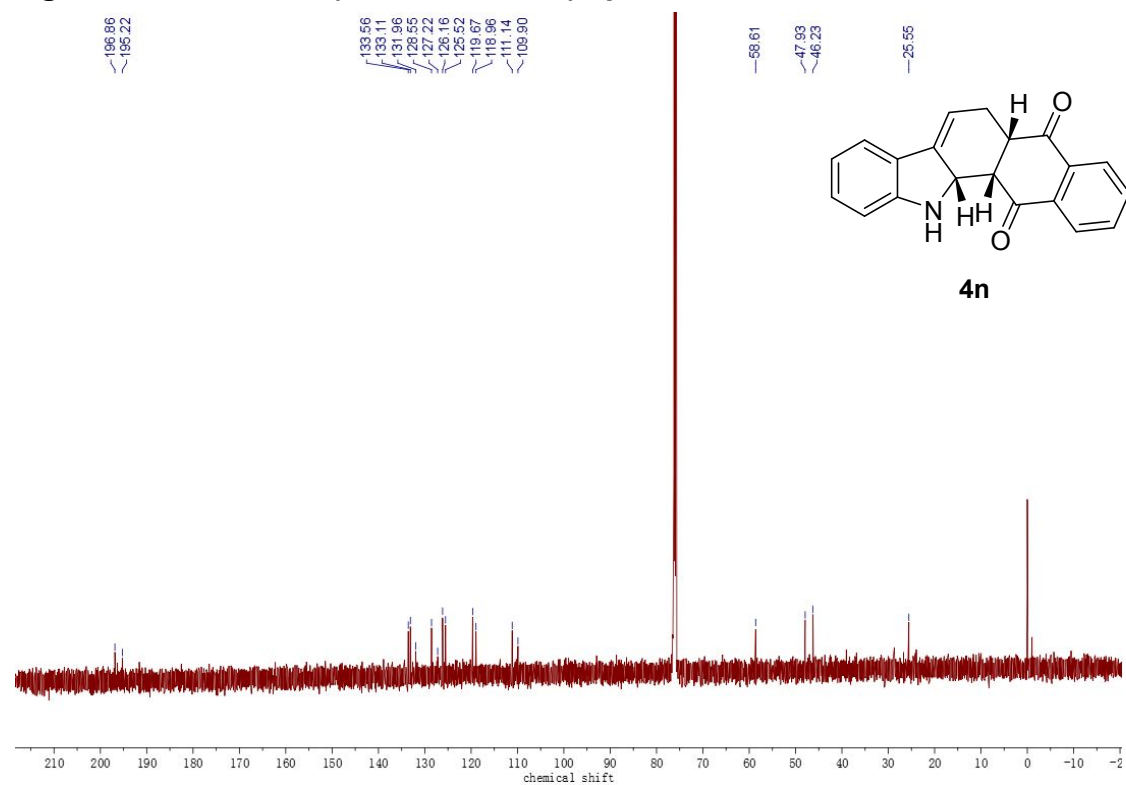

**Figure S98. HPLC spectrum of 4n**



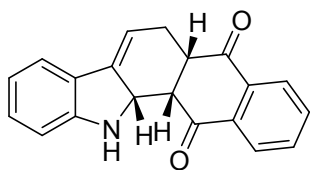

**4n** (The top one is racemic, and the bottom one is chiral)

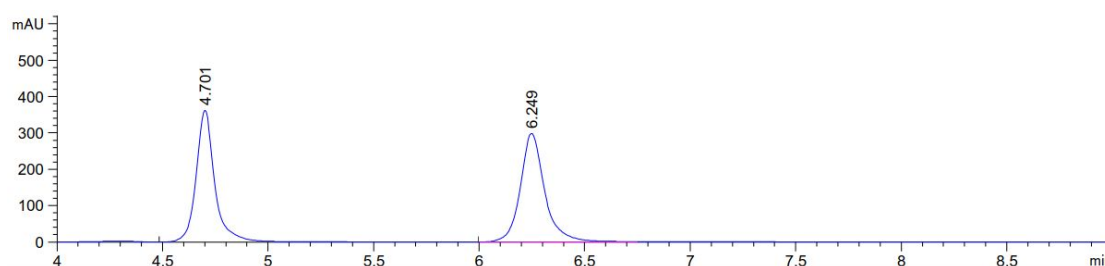

Signal 1: DAD1 A, Sig=254,4 Ref=360,100

| Peak # | RetTime [min] | Type | Width [min] | Area [mAU*s] | Height [mAU] | Area %  |
|--------|---------------|------|-------------|--------------|--------------|---------|
| 1      | 4.701         | MM   | 0.1032      | 2256.42188   | 364.25891    | 48.5430 |
| 2      | 6.249         | MM   | 0.1332      | 2391.87671   | 299.35306    | 51.4570 |

Totals : 4648.29858 663.61197

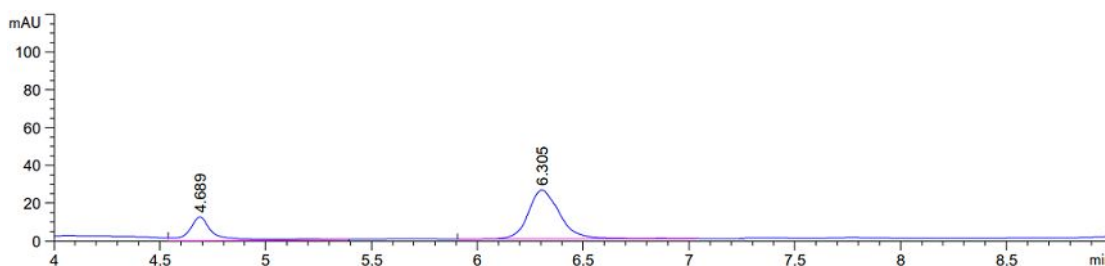

Signal 1: DAD1 A, Sig=254,4 Ref=360,100

| Peak # | RetTime [min] | Type | Width [min] | Area [mAU*s] | Height [mAU] | Area %  |
|--------|---------------|------|-------------|--------------|--------------|---------|
| 1      | 4.689         | VV R | 0.1100      | 104.23135    | 12.66841     | 26.0547 |
| 2      | 6.305         | BV   | 0.1630      | 295.81680    | 25.95681     | 73.9453 |

Totals : 400.04816 38.62521

**(5a*S*,12a*S*,12b*S*)-12-(4-methoxyphenyl)-6,12,12a,12b-tetrahydro-5*H*-naphth**

ho[2,3-a]carbazole-5,13(5aH)-dione (4o)

Figure S99. <sup>1</sup>H NMR (600MHz, CDCl<sub>3</sub>) spectrum of 4o

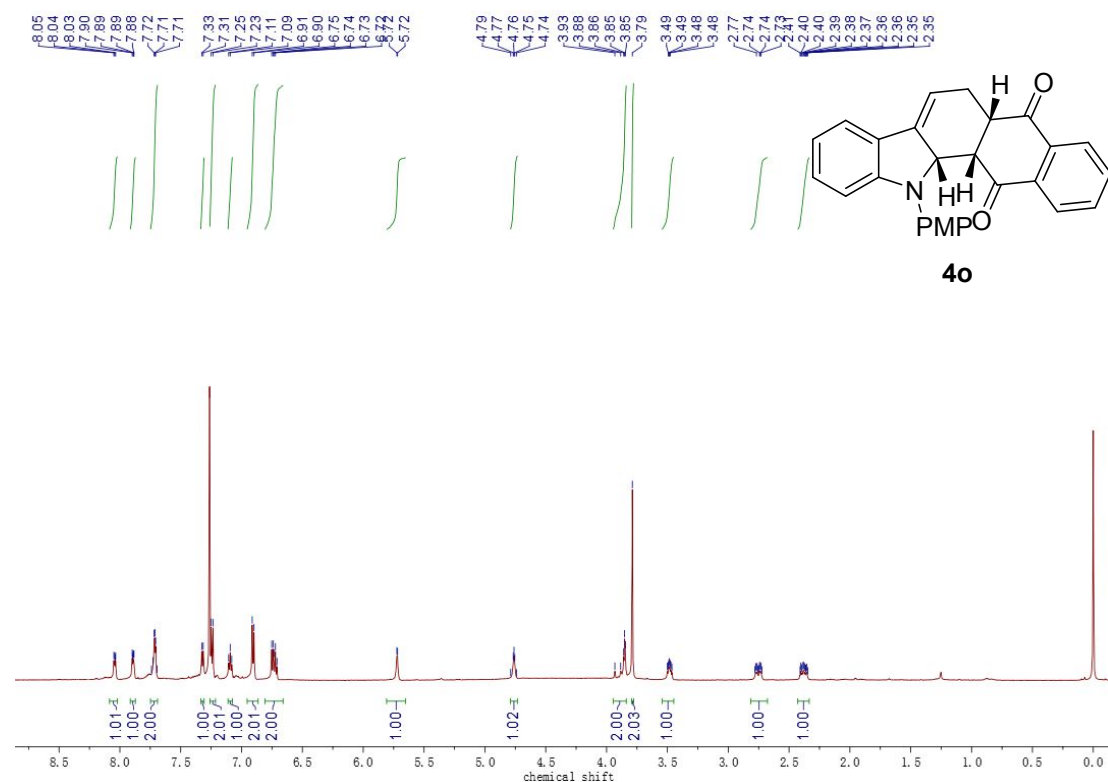

Figure S100. <sup>13</sup>C NMR (151MHz, CDCl<sub>3</sub>) spectrum of 4o

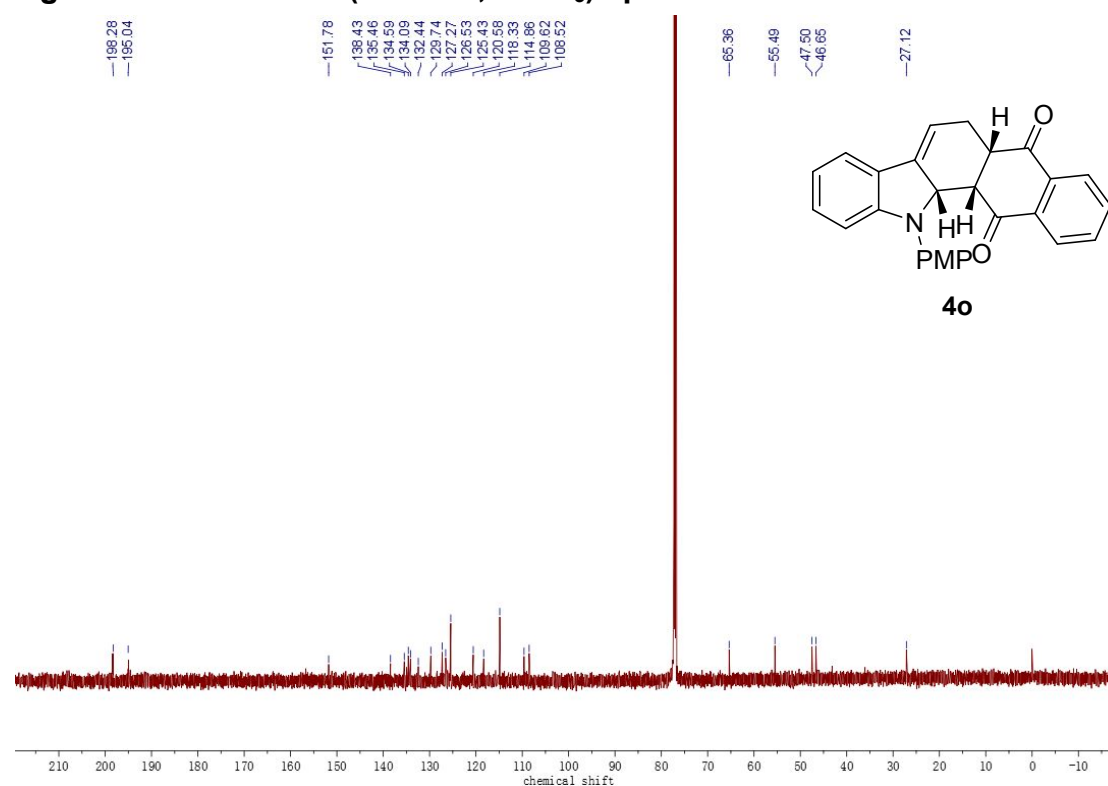

Figure S101. HPLC spectrum of 4o



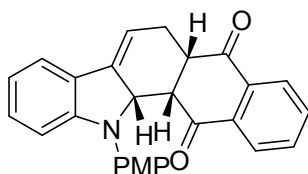

**4o** (The top one is racemic, and the bottom one is chiral)

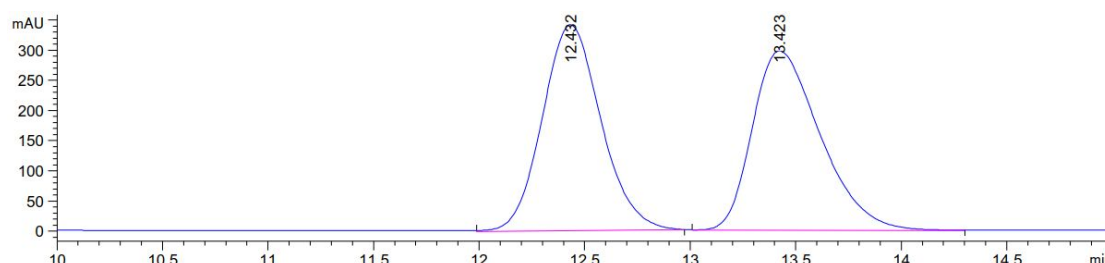

Signal 1: DAD1 A, Sig=254,4 Ref=360,100

| Peak # | RetTime [min] | Type | Width [min] | Area [mAU*s] | Height [mAU] | Area %  |
|--------|---------------|------|-------------|--------------|--------------|---------|
| 1      | 12.432        | MM   | 0.3221      | 6603.14502   | 341.71100    | 49.6960 |
| 2      | 13.423        | MM   | 0.3743      | 6683.92480   | 297.60675    | 50.3040 |

Totals : 1.32871e4 639.31775

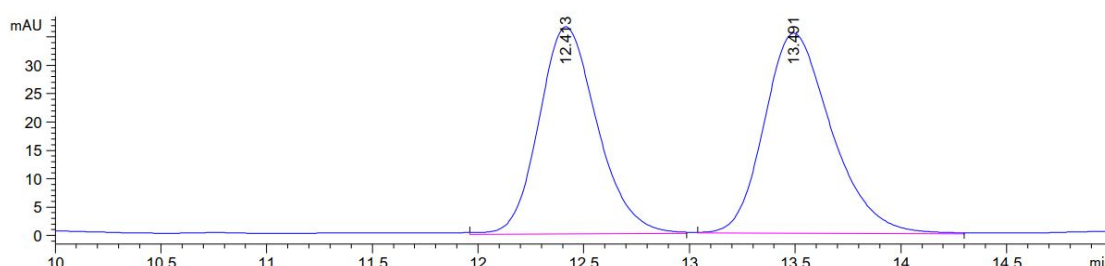

Signal 1: DAD1 A, Sig=254,4 Ref=360,100

| Peak # | RetTime [min] | Type | Width [min] | Area [mAU*s] | Height [mAU] | Area %  |
|--------|---------------|------|-------------|--------------|--------------|---------|
| 1      | 12.413        | MM   | 0.3190      | 700.04437    | 36.57253     | 47.3318 |
| 2      | 13.491        | MM   | 0.3679      | 778.97064    | 35.28646     | 52.6682 |

Totals : 1479.01501 71.85899

**(5a*S*,12a*S*,12b*S*)-12-(4-methoxybenzyl)-6,12,12a,12b-tetrahydro-5*H*-napht**

ho[2,3-a]carbazole-5,13(5aH)-dione (4p)

Figure S102. <sup>1</sup>H NMR (600MHz, CDCl<sub>3</sub>) spectrum of 4p

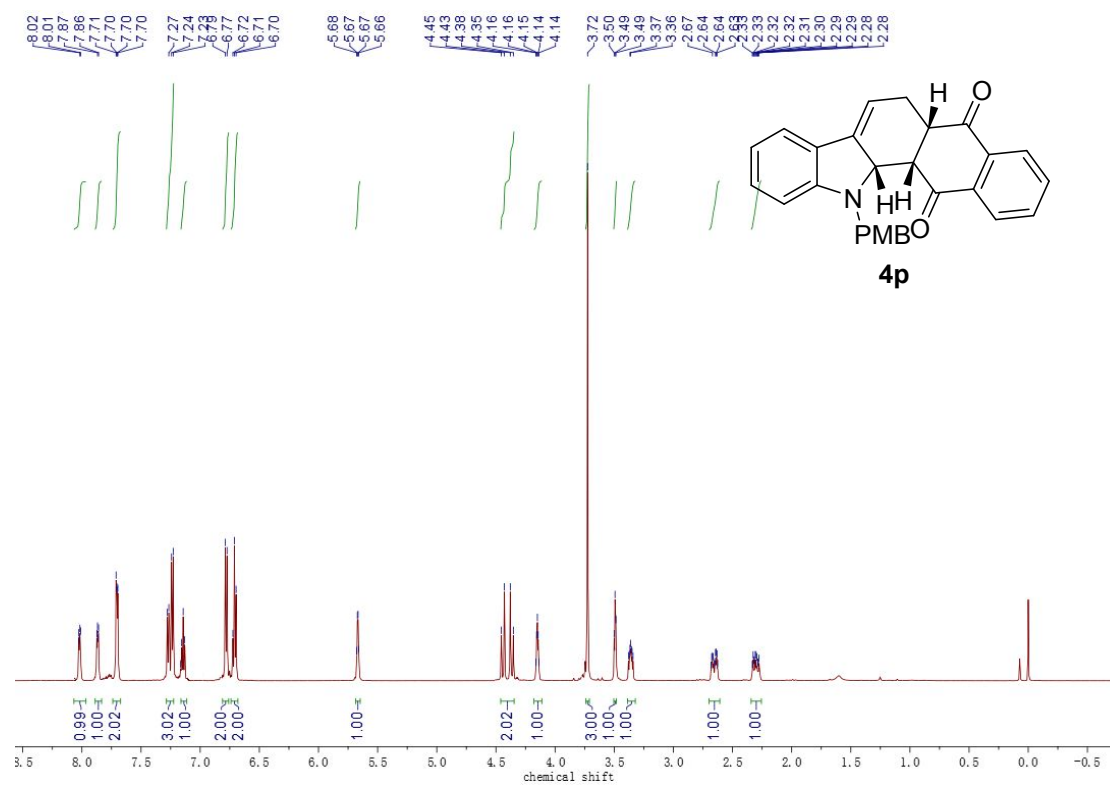

Figure S103. <sup>13</sup>C NMR (151MHz, CDCl<sub>3</sub>) spectrum of 4p

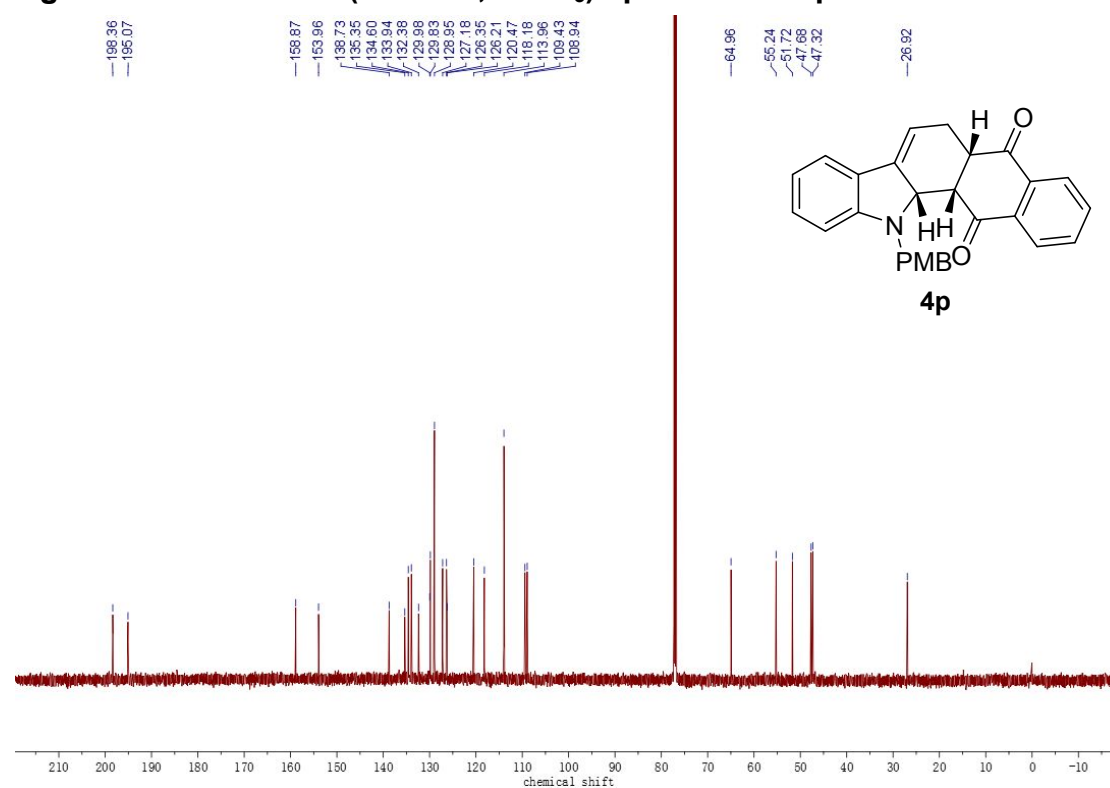

Figure S104. HPLC spectrum of 4p

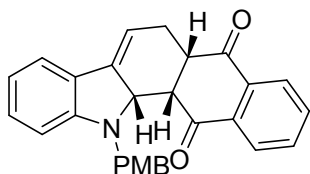

**4p** (The top one is racemic, and the bottom one is chiral)

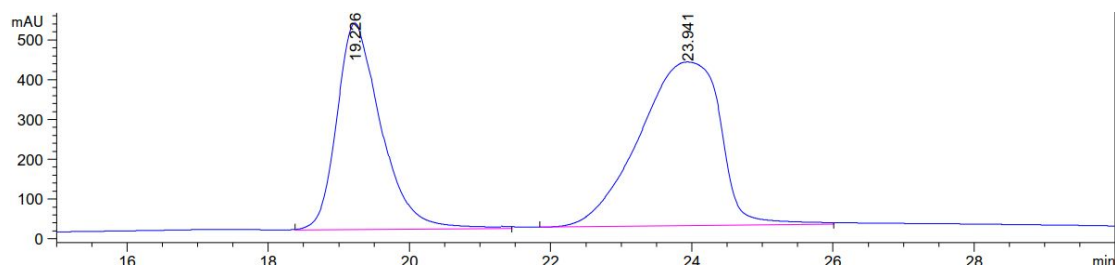

Signal 1: DAD1 A, Sig=254,4 Ref=360,100

| Peak # | RetTime [min] | Type | Width [min] | Area [mAU*s] | Height [mAU] | Area %  |
|--------|---------------|------|-------------|--------------|--------------|---------|
| 1      | 19.226        | MM   | 1.0601      | 3.29921e4    | 518.70599    | 50.1117 |
| 2      | 23.941        | MM   | 1.3308      | 3.28451e4    | 411.34277    | 49.8883 |

Totals : 6.58373e4 930.04877

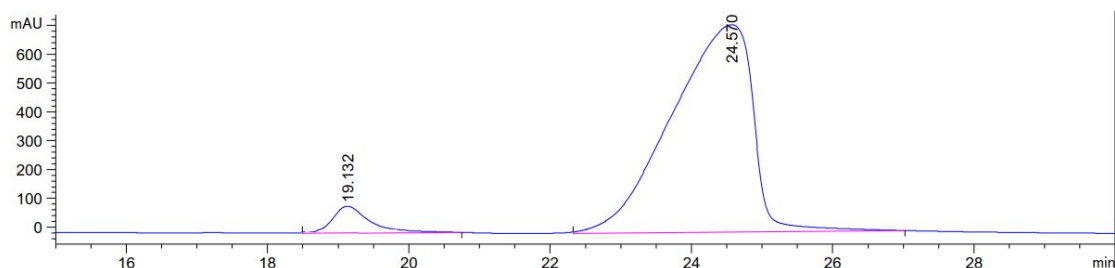

Signal 1: DAD1 A, Sig=254,4 Ref=360,100

| Peak # | RetTime [min] | Type | Width [min] | Area [mAU*s] | Height [mAU] | Area %  |
|--------|---------------|------|-------------|--------------|--------------|---------|
| 1      | 19.132        | MM   | 0.5128      | 2668.26953   | 86.72807     | 4.4186  |
| 2      | 24.570        | MM   | 1.3377      | 5.77183e4    | 719.12042    | 95.5814 |

Totals : 6.03865e4 805.84850

**(5a*S*,12a*S*,12b*S*)-12-(4-(tert-butyl)benzyl)-6,12,12a,12b-tetrahydro-5*H*-nap**

htho[2,3-*a*]carbazole-5,13(5*aH*)-dione (**4q**)

Figure S105. <sup>1</sup>H NMR (600MHz, CDCl<sub>3</sub>) spectrum of **4q**

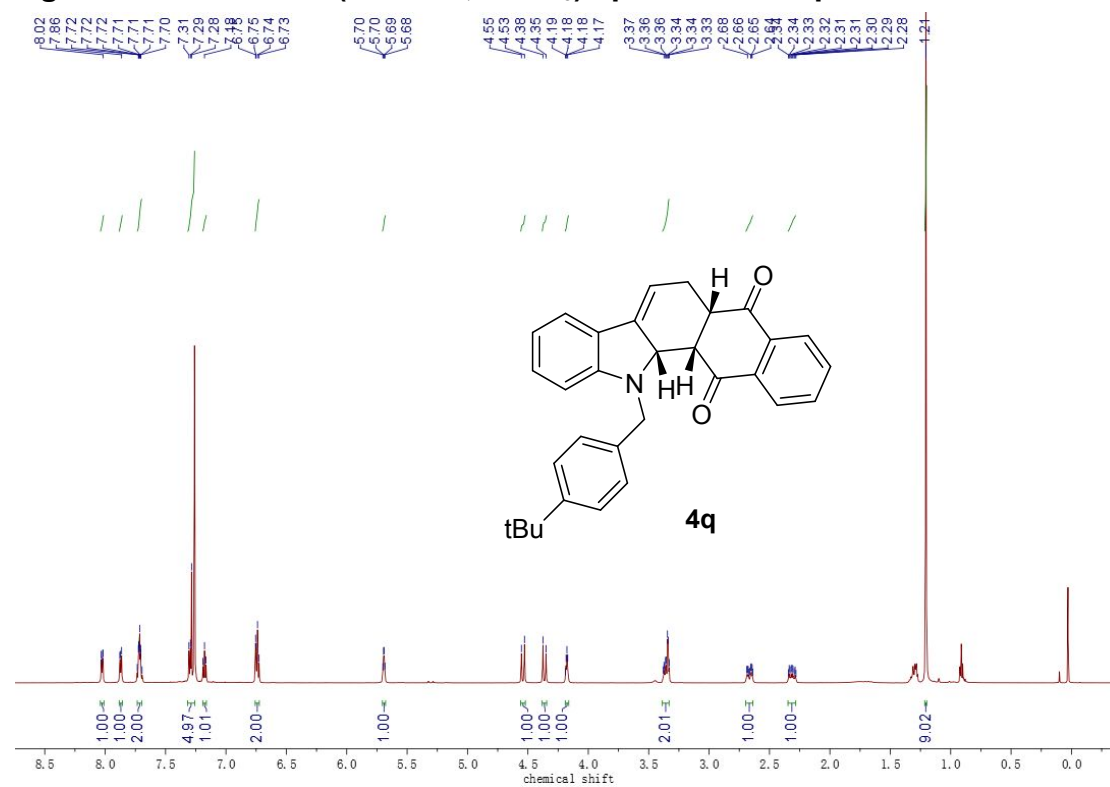

Figure S106. <sup>13</sup>C NMR (151MHz, CDCl<sub>3</sub>) spectrum of **4q**

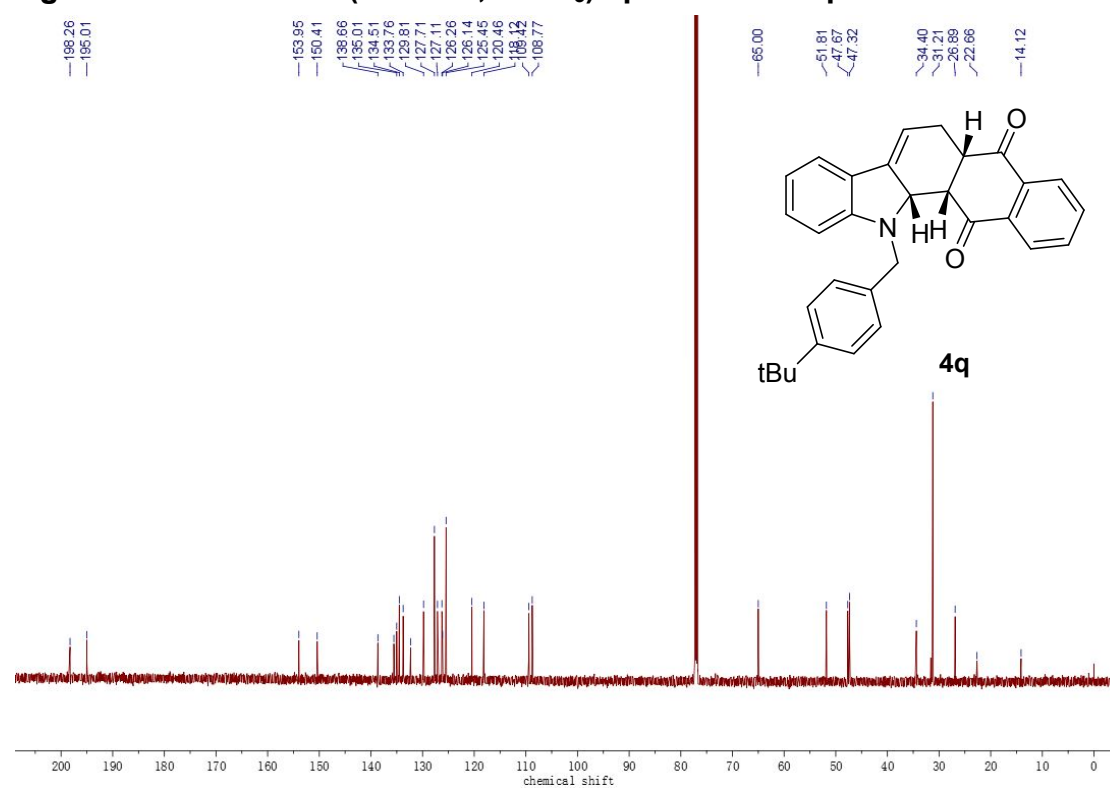

Figure S107. HPLC spectrum of **4q**

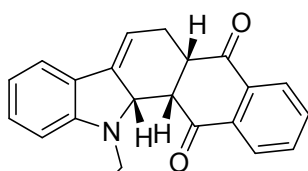

tBu

**4q** (The top one is racemic, and the bottom one is chiral)

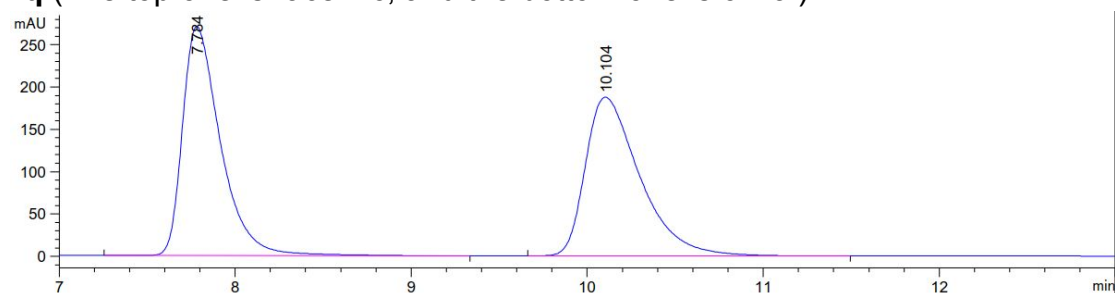

Signal 2: DAD1 B, Sig=254,4 Ref=360,100

| Peak # | RetTime [min] | Type | Width [min] | Area [mAU*s] | Height [mAU] | Area %  |
|--------|---------------|------|-------------|--------------|--------------|---------|
| 1      | 7.784         | BB   | 0.2275      | 4074.92578   | 270.83435    | 50.2940 |
| 2      | 10.104        | BB   | 0.3269      | 4027.28174   | 187.29085    | 49.7060 |

Totals : 8102.20752 458.12520

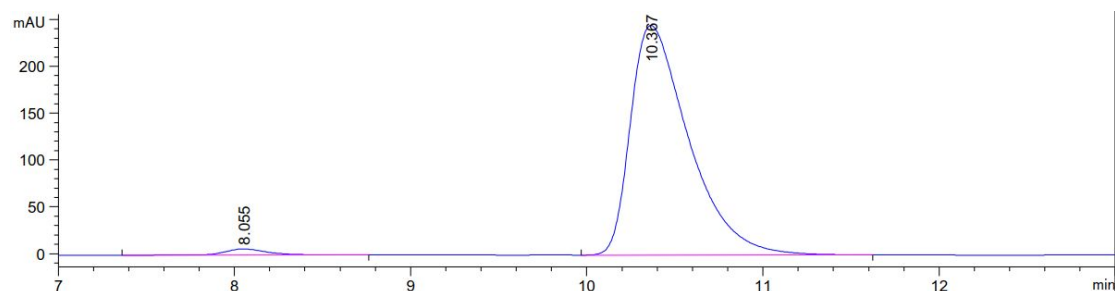

Signal 2: DAD1 B, Sig=254,4 Ref=360,100

| Peak # | RetTime [min] | Type | Width [min] | Area [mAU*s] | Height [mAU] | Area %  |
|--------|---------------|------|-------------|--------------|--------------|---------|
| 1      | 8.055         | BB   | 0.2533      | 110.80417    | 6.55222      | 1.9271  |
| 2      | 10.367        | BB   | 0.3464      | 5639.04834   | 245.14120    | 98.0729 |

Totals : 5749.85251 251.69343



**(5a*S*,12a*S*,12b*S*)-12-(4-chlorobenzyl)-6,12,12a,12b-tetrahydro-5*H*-naphtho[2,3-*a*]carbazole-5,13(5a*H*)-dione (4r)**

**Figure S108. <sup>1</sup>H NMR (600MHz, CDCl<sub>3</sub>) spectrum of 4r**

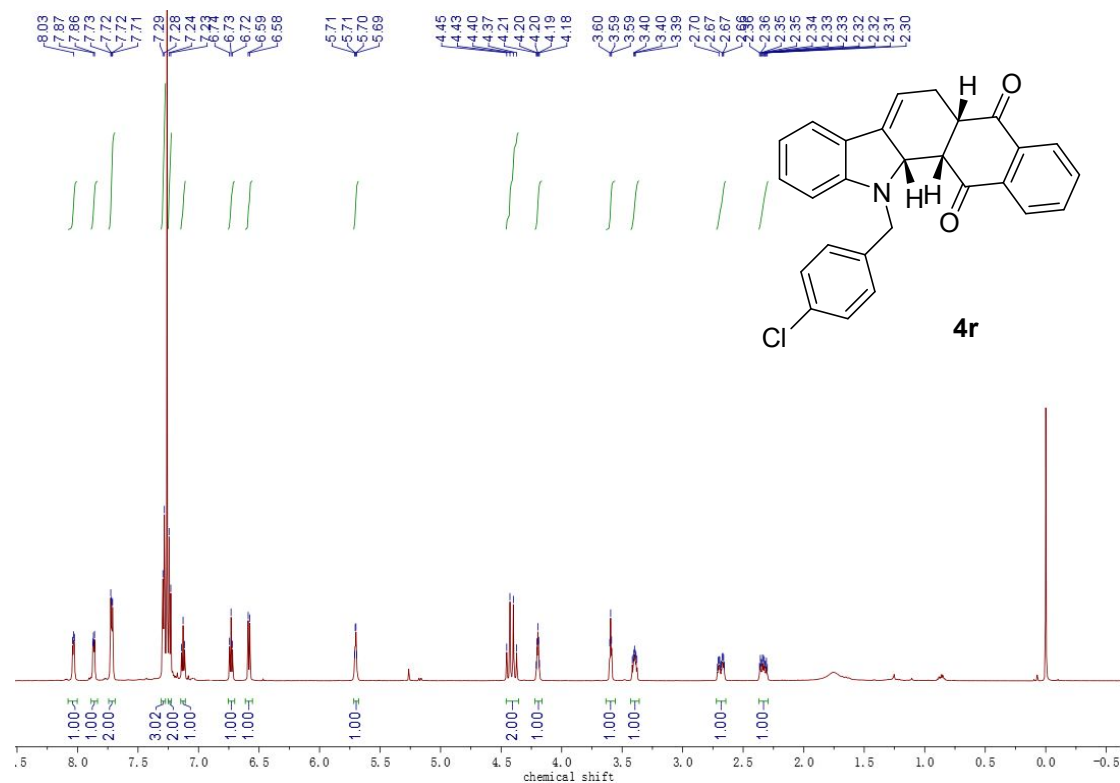

**Figure S109. <sup>13</sup>C NMR (151MHz, CDCl<sub>3</sub>) spectrum of 4r**

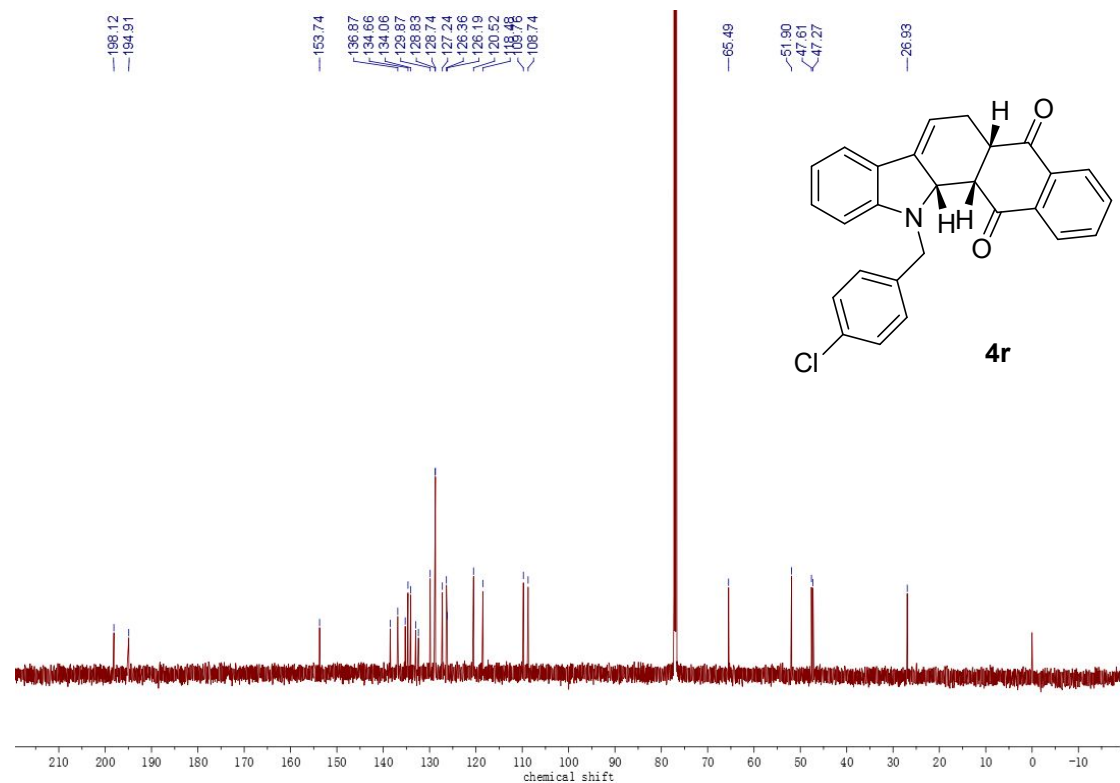

Figure S110. HPLC spectrum of 4r

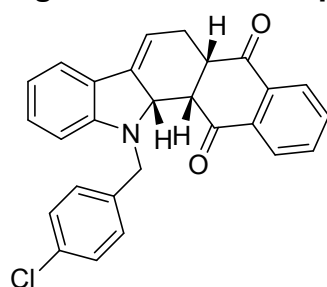

**4r** (The top one is racemic, and the bottom one is chiral)

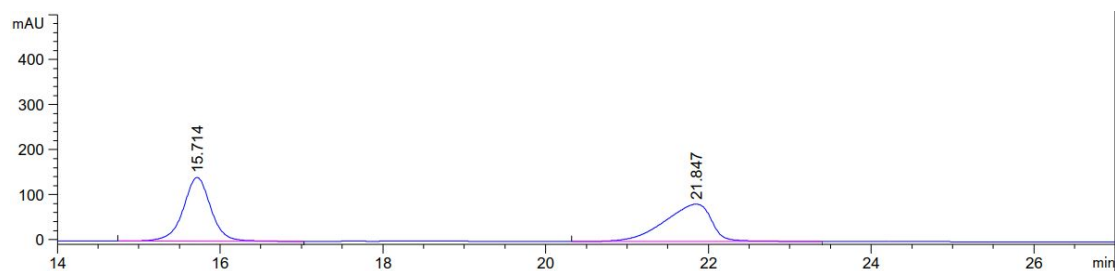

Signal 1: DAD1 A, Sig=254,4 Ref=360,100

| Peak # | RetTime [min] | Type | Width [min] | Area [mAU*s] | Height [mAU] | Area %  |
|--------|---------------|------|-------------|--------------|--------------|---------|
| 1      | 15.714        | BB   | 0.3589      | 3362.33350   | 141.67412    | 49.9900 |
| 2      | 21.847        | BB   | 0.6386      | 3363.67432   | 83.02781     | 50.0100 |

Totals : 6726.00781 224.70193

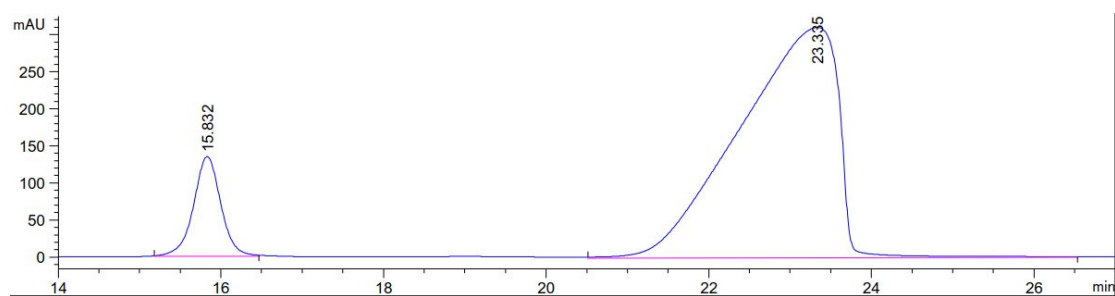

Signal 2: DAD1 B, Sig=254,4 Ref=360,100

| Peak # | RetTime [min] | Type | Width [min] | Area [mAU*s] | Height [mAU] | Area %  |
|--------|---------------|------|-------------|--------------|--------------|---------|
| 1      | 15.832        | MM   | 0.3890      | 3133.49341   | 134.24651    | 10.6499 |
| 2      | 23.335        | MM   | 1.4104      | 2.62892e4    | 310.66104    | 89.3501 |

Totals : 2.94227e4 444.90755

**(5S,5aS,12bS)-12-benzyl-5-hydroxy-5,5a,6,7,12,12b-hexahydro-13H-naphtho[2,3-a]carbazol-13-one (4d-1)**

**Figure S111.  $^1\text{H}$  NMR (600MHz,  $\text{CDCl}_3$ ) spectrum of 4d-1**

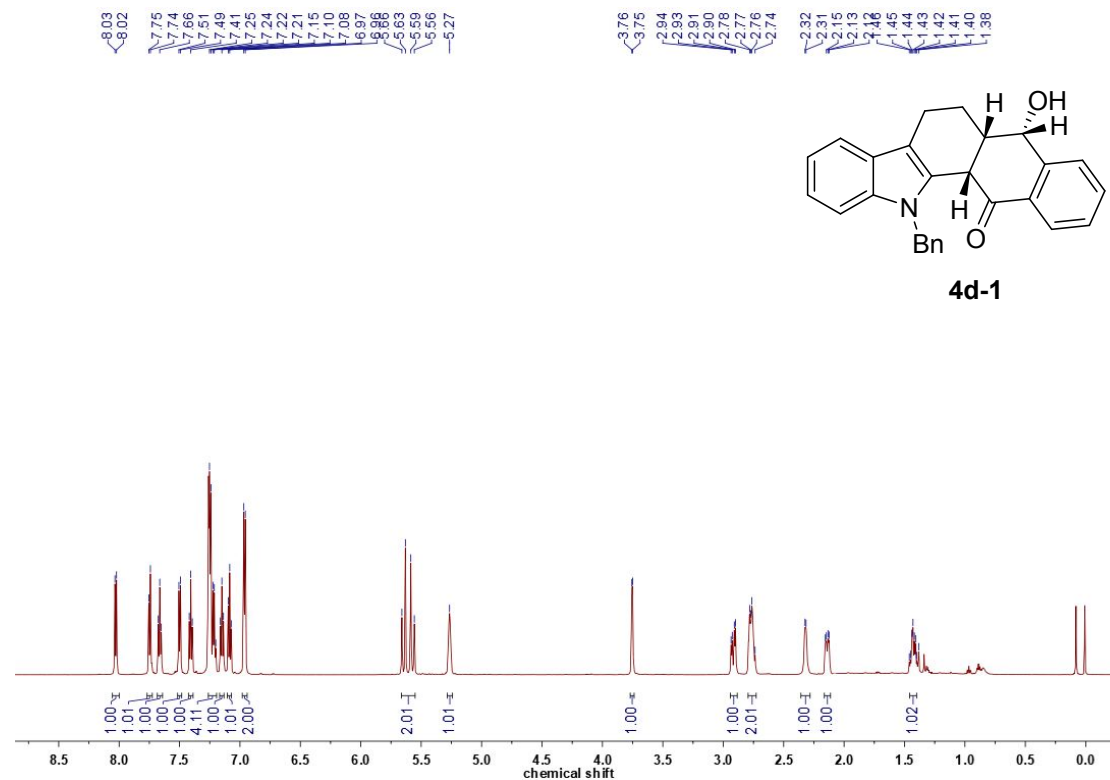

**Figure S112.  $^{13}\text{C}$  NMR (151MHz,  $\text{CDCl}_3$ ) spectrum of 4d-1**

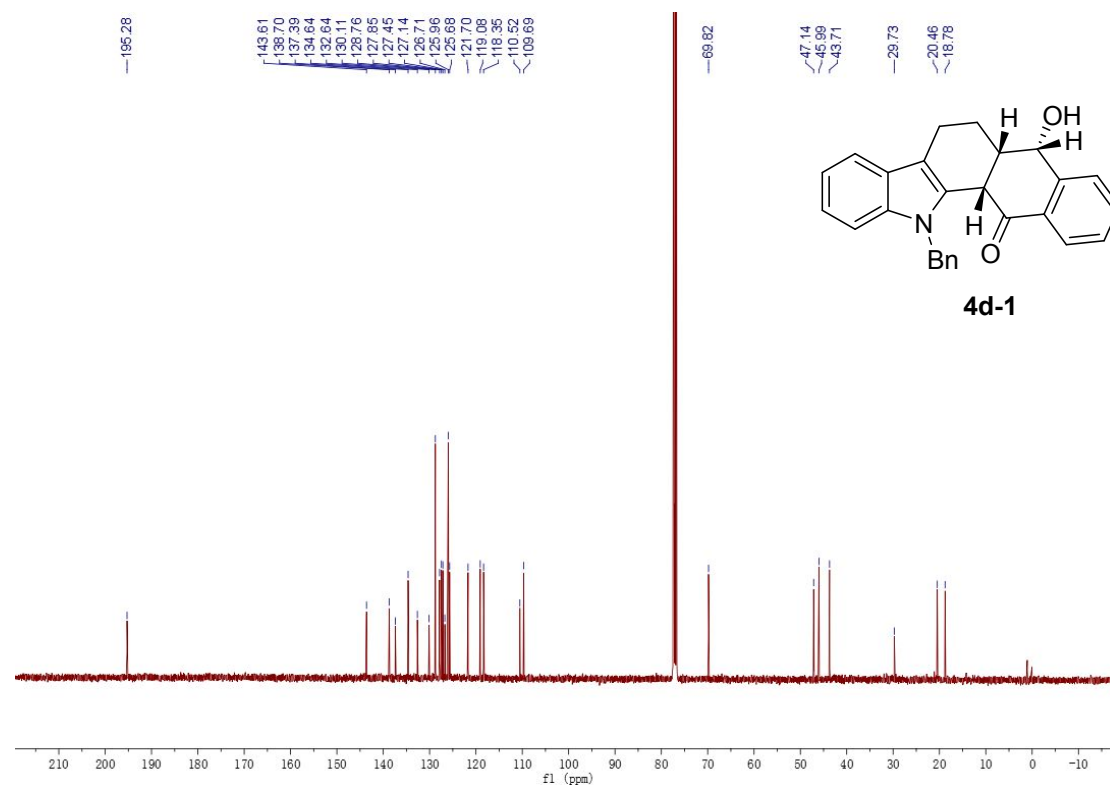



**Figure S113. HPLC spectrum of 4d-1**

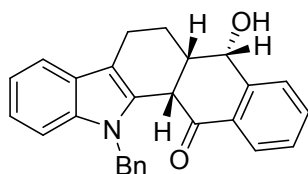

**4d-1** (The top one is racemic, and the bottom one is chiral)

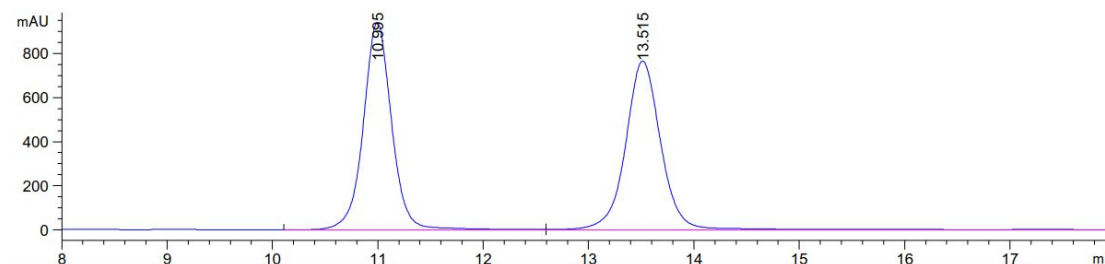

Signal 1: DAD1 A, Sig=254,4 Ref=off

| Peak # | RetTime [min] | Type | Width [min] | Area [mAU*s] | Height [mAU] | Area %  |
|--------|---------------|------|-------------|--------------|--------------|---------|
| 1      | 10.995        | BV   | 0.2874      | 1.76746e4    | 939.91205    | 49.4886 |
| 2      | 13.515        | VV R | 0.3543      | 1.80398e4    | 766.24023    | 50.5114 |

Totals : 3.57144e4 1706.15228

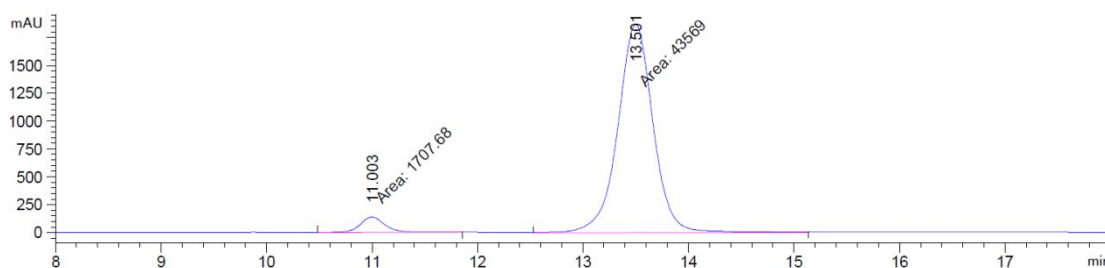

Signal 1: DAD1 A, Sig=254,4 Ref=off

| Peak # | RetTime [min] | Type | Width [min] | Area [mAU*s] | Height [mAU] | Area %  |
|--------|---------------|------|-------------|--------------|--------------|---------|
| 1      | 11.003        | MM   | 0.1947      | 1707.68250   | 146.18575    | 3.7717  |
| 2      | 13.501        | MM   | 0.3888      | 4.35690e4    | 1867.72107   | 96.2283 |

Totals : 4.52767e4 2013.90681

Figure S114. NOESY NMR (600MHz, CDCl<sub>3</sub>) spectrum of 4d-1

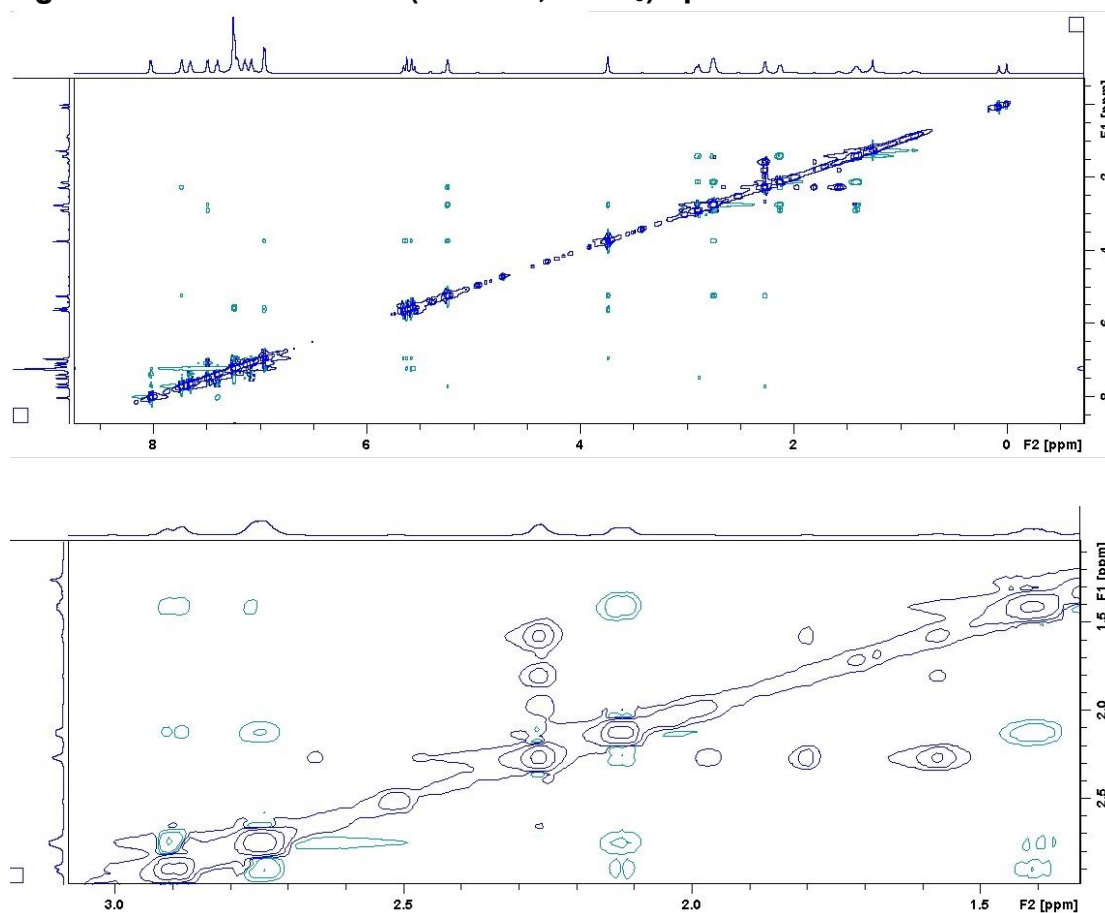

Figure S115. HPLC spectrum of 3a at a minimum 1 mmol scale

mV

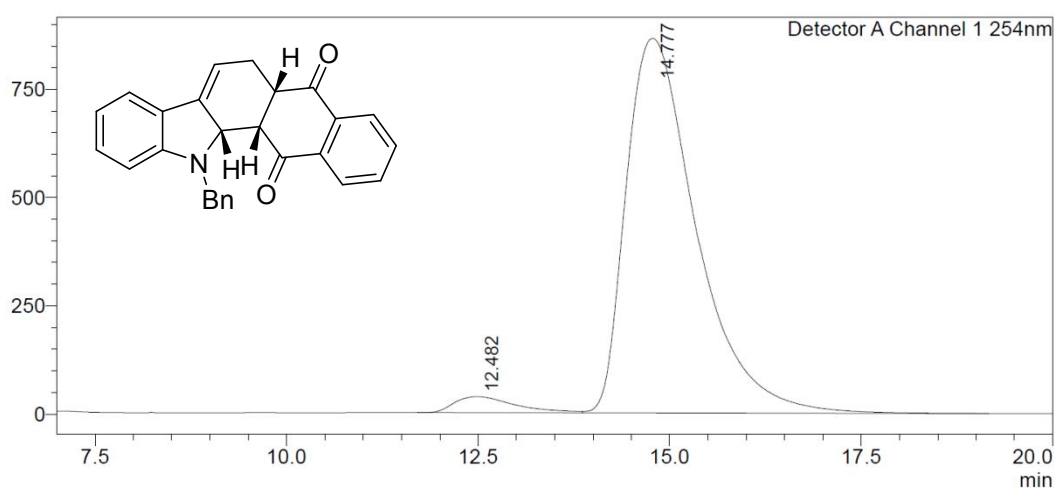

| Peak# | Ret. Time | Area     | Height | Conc.  | Area%   |
|-------|-----------|----------|--------|--------|---------|
| 1     | 12.482    | 2040286  | 37118  | 3.567  | 3.567   |
| 2     | 14.777    | 55155904 | 864956 | 96.433 | 96.433  |
| Total |           | 57196190 | 902073 |        | 100.000 |
